# 1 **MreB filaments create rod shape by aligning along** 2 **principal membrane curvature.**

3  
4 Saman Hussain<sup>\*,1,2</sup>, Carl N. Wivagg<sup>\*,1,2</sup>, Piotr Szwedziak<sup>3#</sup>, Felix Wong<sup>4</sup>, Kaitlin  
5 Schaefer<sup>5,6</sup>, Thierry Izoré<sup>3</sup>, Lars D. Renner<sup>7,8</sup>, Yingjie Sun<sup>1,2</sup>, Alexandre W. Bisson-  
6 Filho<sup>1,2</sup>, Suzanne Walker<sup>6</sup>, Ariel Amir<sup>4</sup>, Jan Löwe<sup>3</sup>, and Ethan C. Garner<sup>1,2</sup>

7  
8 1 Department of Molecular and Cellular Biology, Harvard University, Cambridge, United States.  
9 2 Center for Systems Biology, Harvard University, Cambridge, United States.  
10 3 MRC Laboratory of Molecular Biology, Cambridge, United Kingdom  
11 4 Harvard John A. Paulson School of Engineering and Applied Sciences, Cambridge, MA, United States.  
12 5 Department of Microbiology and Immunology, Harvard Medical School, Boston, MA, United States  
13 6 Department of Chemistry and Chemical Biology, Harvard University, Cambridge, MA, United States  
14 7 Leibniz Institute of Polymer Research, Dresden, Germany  
15 8 Max-Bergmann Center of Biomaterials, Dresden, Germany

16 #Current affiliation: Institute of Molecular Biology and Biophysics, ETH Zürich, Switzerland

17 \* These authors contributed equally to this work.

18  
19 Corresponding Author: Ethan C. Garner  
20 NW 445.20, Northwest Building, 52 Oxford Street, Cambridge, MA 02138  
21 E-mail: [egarner@g.harvard.edu](mailto:egarner@g.harvard.edu)

22  
23 All supplemental movies are available at <http://garnerlab.fas.harvard.edu/mreb2017/>

24 **Abstract**

25 MreB is essential for rod shape in many bacteria. Membrane-associated MreB filaments  
26 move around the rod circumference, helping to insert cell wall in the radial direction to  
27 reinforce rod shape. To understand how oriented MreB motion arises, we altered the  
28 shape of *Bacillus subtilis*. MreB motion is isotropic in round cells, and orientation is  
29 restored when rod shape is externally imposed. Stationary filaments orient within  
30 protoplasts, and purified MreB tubulates liposomes *in vitro*, orienting within tubes.  
31 Together, this demonstrates MreB orients along the greatest principal membrane  
32 curvature, a conclusion supported with biophysical modeling. We observed that  
33 spherical cells regenerate into rods in a local, self-reinforcing manner: rapidly  
34 propagating rods emerge from small bulges, exhibiting oriented MreB motion and  
35 increased glycan crosslinking. We propose that the coupling of MreB filament alignment  
36 to shape-reinforcing peptidoglycan synthesis creates a locally-acting, self-organizing  
37 mechanism allowing the rapid establishment and stable maintenance of emergent rod  
38 shape.

39

## 40 **Introduction**

41 Although many bacteria are rod shaped, the cellular mechanisms that construct and  
42 replicate this geometry have remained largely unknown. Bacterial shape is determined  
43 by the cell wall sacculus, a giant, encapsulating macromolecule that serves to resist  
44 internal turgor pressure. One of the primary components of the cell wall is peptidoglycan  
45 (PG), which is created by the polymerization of single glycan strands linked by peptide  
46 crossbridges. Studies of isolated cell walls from rod-shaped bacteria suggest that  
47 glycan strands are generally oriented circumferentially around the rod, perpendicular to  
48 the long axis of the cell (Gan et al., 2008; Hayhurst et al., 2008; Verwer et al., 1980).  
49 This circumferential, hoop-like organization of cell wall material allows the cell wall to  
50 better resist the internal turgor pressure, as this pressure causes a stress twice as large  
51 in the circumferential direction (on the rod sidewalls) as in the axial direction (on the  
52 poles) (Amir and Nelson, 2012; Chang and Huang, 2014). This organization confers a  
53 mechanical anisotropy to the wall: the mechanically weaker crosslinks in the axial  
54 direction allows the cell wall to stretch more along its length than across its width for a  
55 given stress, and this anisotropy may assist rod-shaped cells in preferentially elongating  
56 along their length (Baskin, 2005; Chang and Huang, 2014). Concordantly, atomic force  
57 microscopy (AFM) has shown that *Escherichia coli* sacculi are 2-3 times more elastic  
58 along their length than across their width (Yao et al., 1999). This rod-reinforcing  
59 circumferential organization is also observed in the cell walls of plants; hypocotyl and  
60 root axis cells rapidly elongate as rods by depositing cellulose fibrils in circumferential  
61 bands around their width, resulting not only in a similar dispersive rod-like growth, but

62 also a similar anisotropic response to stress (Baskin, 2005). The organized deposition  
63 of cellulose arises from cortical microtubules self-organizing into a radial array oriented  
64 around the rod width, and this orients the directional motions of the cellulose synthases  
65 to insert material in circumferential bands (Bringmann et al., 2012; Paredez et al.,  
66 2006).

67  
68 In contrast to our understanding of the self-organization underlying rod-shaped growth  
69 in plants, how bacteria construct a circumferential organization of glycan strands is not  
70 known. This organization may arise via the actions of a small number of genes known to  
71 be essential for the formation and maintenance of rod shape. Collectively termed the  
72 Rod complex, these include the conserved *mreBCD* operon (Wachi and Matsushashi,  
73 1989) and the glycosyltransferase/transpeptidase enzyme pair RodA/Pbp2 (Cho et al.,  
74 2016). The spatial coordination of RodA/Pbp2-mediated PG synthesis is conferred by  
75 *mreB*, an actin homolog (Jones et al., 2001; van den Ent et al., 2001). MreB  
76 polymerizes onto membranes as antiparallel double filaments, which have been  
77 observed to bend liposome membranes inward (Fig. 1A) (Salje et al., 2011; van den Ent  
78 et al., 2014). Loss or depolymerization of MreB causes rod-shaped cells to grow as  
79 spheres (Jones et al., 2001). *In vivo*, MreB filaments move circumferentially around the  
80 width of the rod (Domínguez-Escobar et al., 2011; Garner et al., 2011; van Teeffelen et  
81 al., 2011). Super-resolution imaging has demonstrated that MreB filaments always  
82 translocate along their length, moving in the direction of their orientation (Olshausen et  
83 al., 2013). MreB filaments move in concert with MreC, MreD, and RodA/Pbp2

84 (Domínguez-Escobar et al., 2011; Garner et al., 2011), and loss of any one component  
85 stops the motion of the others. The directional motion of MreB filaments and associated  
86 Rod complexes depends on, and thus likely reflects, the insertion of new cell wall, as  
87 this motion halts upon the addition of cell wall synthesis-inhibiting antibiotics  
88 (Domínguez-Escobar et al., 2011; Garner et al., 2011; van Teeffelen et al., 2011), or  
89 specific inactivation or depletion of Pbp2 (Garner et al., 2011; van Teeffelen et al., 2011)  
90 or RodA (Cho et al., 2016).

91  
92 It is not known how MreB and its associated PG-synthetic enzymes construct rod-  
93 shaped cells. As the motions of the Rod complexes reflect the insertion of new cell wall,  
94 their circumferential motions could deposit glycans in the hoop-like organization  
95 required to both build and reinforce rod shape. Therefore, we worked to understand the  
96 origin of this circumferential organization, seeking to determine what orients  $\mu$  the  
97 motions of MreB and associated enzymes around the rod width in *Bacillus subtilis*. *B.*  
98 *subtilis* contains 3 MreB paralogs (MreB, Mbl, and MreBH) that co-polymerize into  
99 mixed filaments and always colocalize *in vivo* (Defeu Soufo and Graumann, 2006)  
100 (Soufo and Graumann, 2010) (Dempwolff et al., 2011). Thus, we assume throughout  
101 that MreB and Mbl are interchangeable for fluorescent imaging.

102

## 103 **Results**

### 104 **Oriented MreB Motion Cannot Arise from an Ordered Cell Wall Template**

105 The mechanism by which MreB filaments and associated PG synthases orient their  
106 motion around the rod circumference is not known. Each filament-synthase complex is  
107 disconnected from the others, moving independently of proximal neighbors (Garner et  
108 al., 2011). The organized, circumferential motion of these independent filament-  
109 synthase complexes could arise in 2 ways: 1) A templated organization, where cell wall  
110 synthetic complexes move along an existing pattern of ordered glycan strands in the cell  
111 wall as they insert new material into it (Holtje, 1998), or 2) A template-independent  
112 organization, where each synthetic complex has an intrinsic mechanism that orients its  
113 motion and resultant PG synthesis around the rod circumference.

114

115 To explore the extent of order within the motions of the Rod complex, we analyzed the  
116 trajectories of GFP-Mbl filaments during the period of one axial revolution using total  
117 internal reflection fluorescence microscopy (TIRFM). We observed that filament  
118 trajectories close in time (within the period of one revolution) frequently cross (Fig. 1C,  
119 Movie S1), making it unlikely that MreB filaments move along a perfectly ordered  
120 template. Rather, the motions of filaments are overall oriented, but not perfectly aligned,  
121 a characteristic reflected by the broad distribution of angles that MreB (Fig. 1B) and the  
122 other components of the Rod complex move relative to the long axis of the cell  
123 (Domínguez-Escobar et al., 2011; Garner et al., 2011). As MreB movement reflects the  
124 insertion of new glycan strands, these motions indicate that the sacculus is built from  
125 somewhat disorganized, yet predominantly circumferential strands, a conclusion in  
126 agreement with previous studies that assayed cell wall organization with cryo-electron

127 microscopy (Gan et al., 2008), atomic force microscopy (Hayhurst et al., 2008), and X-  
128 ray diffraction (Balyuzi et al., 1972). Furthermore, preexisting cell wall is not necessary  
129 for the regeneration of rod shape from wall-less *B. subtilis* L-forms (Kawai et al., 2014),  
130 indicating that both oriented MreB motion and rod shape can arise without an ordered  
131 template.

132

### 133 **MreB Motions Become Isotropic in the Absence of Rod Shape**

134 As it appeared that organized MreB motion does not arise from patterns in the cell wall,  
135 we hypothesized there was an intrinsic mechanism orienting the motion of each MreB  
136 filament-cell wall synthetic complex. To test this hypothesis, we examined MreB motions  
137 as we changed the shape of cells from rods to spheres. As the internal turgor pressure  
138 and stiffness of *B. subtilis* resists external mechanical perturbations to its shape  
139 (Renner et al., 2013), we first altered the shape of cells by controlling the level of wall  
140 teichoic acids (WTAs). WTAs are negatively charged cell wall polymers believed to  
141 increase the rigidity of the sacculus via their coordination of extracellular  $Mg^{2+}$  (Matias  
142 and Beveridge, 2005) or modulation of hydrolase activity (Atilano et al., 2010).  
143 Knockouts in *tagO*, the first gene in the WTA synthesis pathway, create large, slow-  
144 growing, round cells that still synthesize PG, building extremely thick and irregular cell  
145 walls (D'Elia et al., 2006). We placed *tagO* under xylose-inducible control and grew cells  
146 at different induction levels. At high TagO inductions, cells displayed normal widths, as  
147 expected. As we reduced TagO levels, rods became gradually wider (Fig. 1D,1F) until,  
148 beneath a given induction, cells were no longer able to maintain rod shape, growing as

149 spheres (or clumps of spheres) with no identifiable long axis. At intermediate induction  
150 levels, we observed a transition region between the two states, with cells growing as  
151 steady state populations of interconnected rods and spheres (Fig 1D). In agreement  
152 with models that cell wall rigidity is conferred via WTA-mediated coordination of  $Mg^{2+}$   
153 (Thomas and Rice, 2014), both cell width and the amount of TagO induction  
154 determining the rod/sphere transition could be modulated by  $Mg^{2+}$  levels (Fig. 1E, S1).  
155  
156 **Figure 1. Curved MreB filament motions do not follow an ordered template (A-C).**

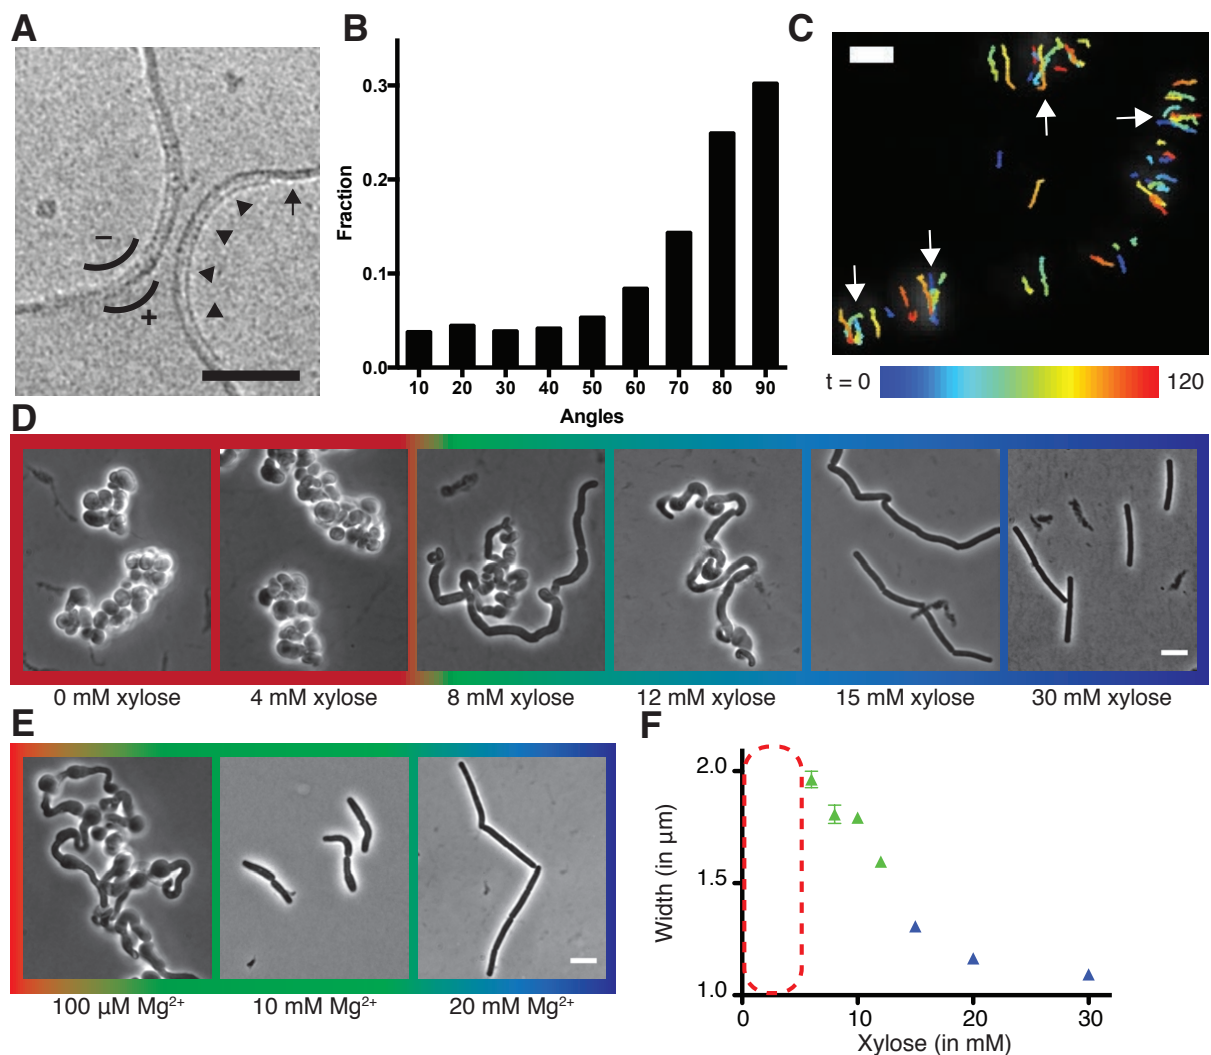

157



158 **(A)** The negative curvature of MreB filaments (arrowheads) aligns with the negative principal curvature of  
159 the liposome surface (arrow). Scale bar is 50 nm. **(B)** Angular distribution of GFP-Mbl trajectories relative  
160 to the long axis of the cell indicates that while the distribution has a mode of 90°, it is broad (SD = 34°).  
161 **(C)** Particle tracking of Mbl-GFP during 100 seconds (1 rotation) indicates trajectories close in time  
162 frequently cross paths (white arrows). Scale bar is 1 μm. **Modulating teichoic acid levels titrates cell**  
163 **width and shape (D-F).** **(D)** Strains with *tagO* under inducible control display a teichoic acid-dependent  
164 decrease in width. **(E)** BEG300 at an intermediate level of *tagO* induction (15mM xylose) shows a Mg<sup>2+</sup>  
165 dependent decrease in width. All scale bars are 5 μm. See also Figure S1. **(F)** Plot of cell width as a  
166 function of *tagO* induction in LB supplemented with 20 mM Mg<sup>2+</sup>, calculated from rod-shaped cells (error  
167 bars are Standard Error of the Mean (SEM)). Areas not plotted at lower xylose levels (red dashed  
168 rectangle) are regions where cells are round (no width axis). Color scheme for D-F: red indicates round  
169 cells (no width axis), blue indicates rods (measurable width axis), and green indicates intermediate  
170 regimes where both rods and round cells are observed.

171 By tracking the motion of GFP-MreB filaments in these differing cell shapes, we found  
172 that motion is always oriented in rods, moving predominantly circumferentially at all  
173 induction levels above the rod/sphere transition. However, in round cells (those induced  
174 beneath the rod/sphere transition point or in *tagO* knockouts) MreB filaments continued  
175 to move directionally, but their motions were isotropic, moving in all directions (Fig. 2A,  
176 Movie S2A). To quantify the relative alignment of MreB under each condition, we  
177 calculated the angle between trajectory pairs less than 1 μm apart (Fig. 2B, S2A). This  
178 analysis revealed that MreB motions are more aligned when cells are rods: above the  
179 rod/sphere transition, trajectories have a median angle difference of 26°; while at low  
180 TagO inductions, where cells are round, the angle difference increases to 42°, close to  
181 that of randomly oriented trajectories (45°).

182

183 To verify that the loss of oriented MreB motion was due to the changes in cell shape,  
184 and not from some other effect of reduced WTA levels, we created round cells by  
185 alternate means. Depletion of both elongation PG transpeptidases (Pbp2a and PbpH)  
186 causes rod-shaped cells to become wider over time as they convert to spheres (Garner  
187 et al., 2011). We used this gradual transition of rods into spheres to examine both the  
188 width and overall shape dependence of MreB motion. At initial points of depletion (1 - 2  
189 hours) the rods widened but maintained circumferential MreB motion. At 2.5 hours of  
190 PbpA depletion, cells were a mix of spheres and rods of differing widths. These cells  
191 displayed the same pattern of MreB orientation observed above: round cells contained  
192 unoriented MreB, while nearby rod shaped cells showed circumferential motion (Fig.  
193 2C, Movie S2B). Quantitation of trajectories from all cells (both rods and spheres) at  
194 each time point of depletion indicated an increase in the median angle between  
195 trajectories as the population grew wider and rounder over time (Fig. 2D, S2D).

196

197 In *E. coli*, the angle of mutant MreB filaments relative to the long axis has been reported  
198 to increase with cell width (Ouzounov et al., 2016). To test if the angle of MreB  
199 movement changes with respect to cell width in *B. subtilis*, we calculated the angle of  
200 each trajectory to the long axis for all cells in our data with an identifiable width axis. At  
201 the same time, we also measured the curvature of each cell to determine how the  
202 overall shape of the cell affected the orientation of motion (Fig. S2E). This revealed that  
203 MreB motion in rods remained equivalently oriented over a wide range of rod widths, up

204 to  $\sim 2 \mu\text{m}$  (Fig. 2E, S2B, S2C). Beyond a  $2 \mu\text{m}$  width, cells began to lose their rod shape  
 205 as they became more spherical, and the predominantly circumferential orientation of  
 206 MreB motion was lost (Fig. 2E, S2E). This suggested that oriented MreB motion does  
 207 not sense or rely on a specific cell radius; rather the orientation relies on differences  
 208 between the two principal curvatures of the membrane. It appears that the motion of  
 209 MreB filaments is oriented along the direction of greatest principal curvature: In rods,  
 210 there is zero curvature along the rod length, and high curvature around the rod  
 211 circumference, along which filaments orient. In contrast, in round cells where MreB  
 212 motion is isotropic, the two principal curvatures are equal (Fig. 2F).

213

214 **Figure 2. Oriented MreB motion correlates with rod shape.**

215 **(A)** BEG300 at maximum *tagO*  
 216 induction (30 mM) is rod-shaped,  
 217 and MreB tracks are largely  
 218 oriented perpendicular to the  
 219 midline of the cell (*left*).  $\Delta tagO$   
 220 cells show round morphologies  
 221 with unaligned MreB motion  
 222 (*right*). **(B)** Median inter-track  
 223 angle difference for track pairs  $\leq$   
 224  $1 \mu\text{m}$  apart, plotted for BEG300  
 225 at several *tagO* induction levels,  
 226  $\Delta tagO$  cells, and a simulation of  
 227 randomly oriented angles (*sim*).

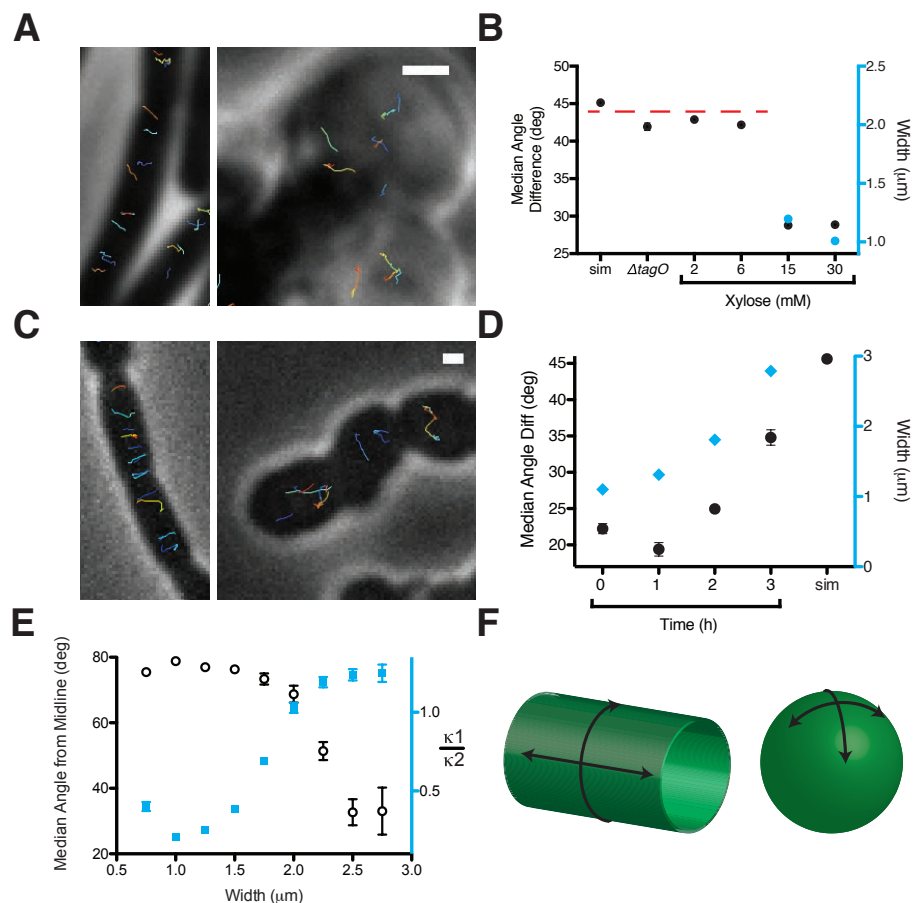

228 For spherical cells width is not measurable, indicated with a dashed red line. **(C)**  $\Delta pbpH$  cells with *pbpA*  
229 under IPTG control display aligned MreB motion when *pbpA* is fully induced and cells are rods (*left*), but  
230 display unaligned MreB motion as Pbp2a levels reduce and cells become round (*right*). **(D)** Median inter-  
231 track angle difference for track pairs 1  $\mu\text{m}$  apart during Pbp2a depletion with cell widths at each time  
232 point. **(E)** Median angle from the midline (white circles) calculated for all rod-shaped cells from  
233 experiments in 2A-D plotted as a function of cell width. MreB filament alignment falls off rapidly beyond 2  
234  $\mu\text{m}$ , a point corresponding to where cells become round, as shown by the ratio of principal curvatures  
235 (blue squares) approaching 1. See Fig S2E for further explanation. **(F)** Schematic showing the difference  
236 between the 2D surface curvature profile of rods and spheres. On the inside surface of spheres, all points  
237 have negative, yet equal values for both principal curvatures. In rods, however, one principal curvature is  
238 negative (the radius), while the other is 0 (the flat axis along the rod). All scale bars are 1  $\mu\text{m}$ . All error  
239 bars are SEM. See also Figure S2.

240

## 241 **MreB Aligns Within Round Cells and Protoplasts Forced into Rod Shape**

242 To further verify that MreB filaments orient in response to overall cell shape, we  
243 externally imposed rod shape on cells with unoriented MreB motion. We loaded TagO-  
244 induced cells into long 1.5  $\times$  1.5  $\mu\text{m}$  microfluidic chambers, then reduced TagO  
245 expression to levels insufficient to produce rods in liquid culture (Fig. 3A, S3A). After  
246 TagO depletion, cells expanded to fill the chamber indicating that WTA-depletion  
247 caused shape changes just as in bulk culture (Fig. 3A, S3A). Within these chambers,  
248 cells grew as rods, but at a wider width (1.5  $\mu\text{m}$ ) than wild-type cells, set by the  
249 chamber. When cells grew out of the chamber they swelled just as in bulk culture,  
250 showing confinement was required for rod shape at this induction level (Fig. 3B, S3A).  
251 In the TagO-depleted cells confined into rod shapes, MreB moved circumferentially (Fig.

252 3C, Movie S3) with an angular distribution similar to that of wild-type cells ( $90^\circ$ , SD = 36  
253  $^\circ$ ) (Fig. 3F(i)), confirming that MreB orients in response to the cells having rod shape.  
254 This experiment demonstrates that the isotropic MreB motion observed in round cells  
255 arises from the lack of rod shape, and not from some other effect of our genetic  
256 perturbations. This experiment also showed another unexpected result: the doubling  
257 time of free (unconstrained) cells induced at similar TagO levels is slow ( $53 \pm 10$  min),  
258 but confining them into rod shape restored their doubling time ( $44 \pm 4$  min) toward wild-  
259 type rates ( $39 \pm 9$  min) (Figure S3C).

260  
261 Next, we attempted to decouple MreB filament orientation from both A) the directional  
262 motion of filaments, and B) any structure within the cell wall. To accomplish this, we  
263 examined filament orientation in protoplasts (cells without cell wall) that we confined into  
264 different shapes, using highly expressed GFP-MreB to assay long filaments, and GFP-  
265 Mbl to assay short filaments. We protoplasted cells in osmotically stabilized media  
266 (Wyrick and Rogers, 1973), then grew them under agar pads containing micro-  
267 patterned cross shapes. Cells in the center of these crosses ( $\sim 5$   $\mu\text{m}$  diameter) were  
268 forced to grow as spheres, whereas cells in the arms were constrained to grow into rods  
269 of various widths ranging from 2-5  $\mu\text{m}$ . (Fig. 3D). Cells growing in these molds did not  
270 produce cell wall, as determined by WGA staining (Fig. S3B). As reported previously  
271 (Domínguez-Escobar et al., 2011), MreB filaments within protoplasts did not move  
272 directionally (Movie S4), likely because the cell wall provides the fixed surface across  
273 which the PG synthesis enzymes move. Within the protoplasts confined into the

274 smallest rod shapes (2  $\mu\text{m}$ ), filaments oriented at a distribution of angles predominantly  
275 perpendicular to the cell length (Fig. 3E-F). The angular distributions of short GFP-Mbl  
276 filaments and longer GFP-MreB filaments were similar to each other ( $94^\circ \pm 25$  and  $93^\circ \pm$   
277  $34$  respectively), and also similar to the distribution of filament trajectories observed in  
278 intact, wild-type cells ( $88^\circ$ ,  $\text{SD} = 34^\circ$ ). As we increased the width of the imposed rod  
279 shape from 2 to 5  $\mu\text{m}$ , filaments remained predominantly oriented in all cases, but the  
280 distribution of alignment became increasingly broad ( $86^\circ$ ,  $\text{SD} = 41^\circ$  at 5  $\mu\text{m}$ ). In contrast  
281 to confinement in rods, both short and long filaments in spherically confined protoplasts  
282 remained unoriented (Fig. 3E). Together, these data demonstrate that MreB filaments  
283 orient to point around the rod width even in the absence of cell wall or directional  
284 motion, as long as the cell has a rod shape. These experiments also demonstrate that  
285 MreB filaments will align even in wider rods, where the difference in principal curvatures  
286 is smaller than in wild-type cells, but that, as the difference in principal curvatures  
287 decreases, filament alignment becomes more disordered.  
288

289 **Figure 3. MreB filaments orient when rod shape is induced by external**  
 290 **confinement.**

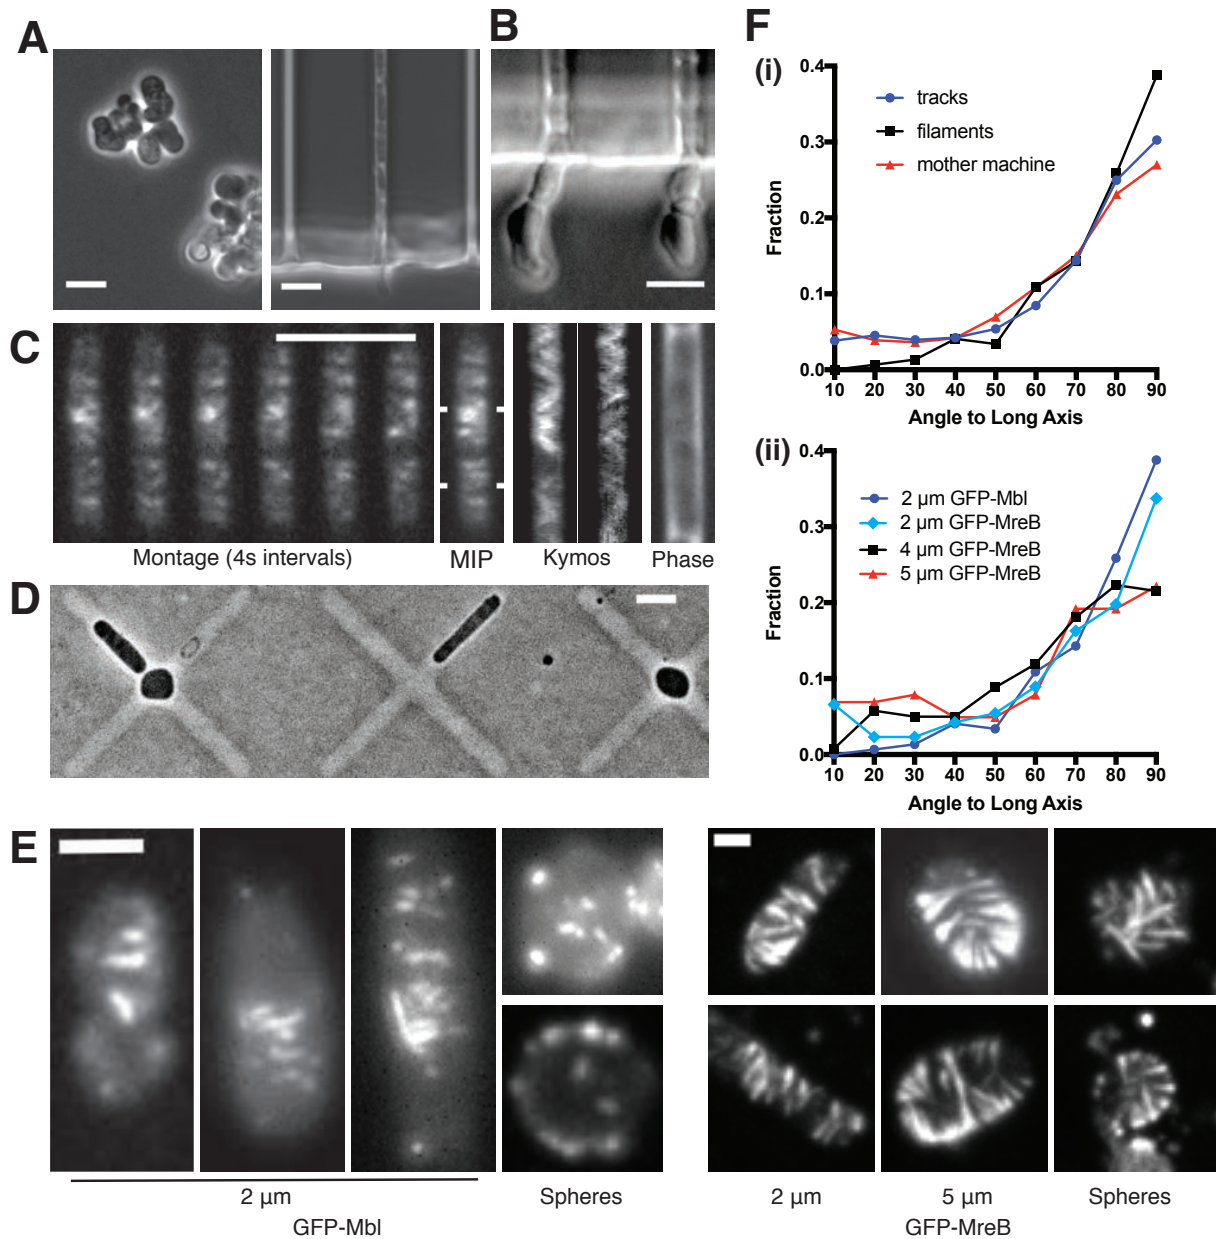

291  
 292 **(A)** Phase contrast images of BEG300 grown in LB supplemented with 2 mM xylose and 20 mM Mg<sup>2+</sup> in  
 293 bulk culture (*left*) or confined into microfluidic channels of 1.5 × 1.5 μm (*right*). **(B)** Confined cells induced  
 294 at 3 mM xylose in 20 mM Mg<sup>2+</sup> progressively swell upon escaping confinement into free culture. See also  
 295 Figure S3A. **(C)** (*Left*) Montage of MreB filaments moving across a confined cell. (*Right*) Maximal intensity  
 296 projection of montage, kymographs of marked points and a phase contrast image of the cell. Scale bars

297 for  $a-c = 5 \mu\text{m}$ . **(D)** Phase contrast images of protoplasts contained in agar crosses. Cells in the center  
298 grow to be round while cells in arms grow as elongated rods. **(E)** (*left*) Short GFP-Mbl filaments orient  
299 circumferentially in rod-shaped protoplasts ( $2 \mu\text{m}$ ) but lack orientation in round protoplasts (*spheres*).  
300 (*right*) Long GFP-MreB filaments orient in rod-shaped protoplasts ( $2 \mu\text{m}$ ); GFP-MreB filaments are still  
301 oriented in wider rod-shaped protoplasts ( $5 \mu\text{m}$ ), but not to the same extent. In round protoplasts, GFP-  
302 MreB filaments are unoriented (*spheres*). See also Fig. S3B. Scale bar is  $2 \mu\text{m}$ . **(F)** **(i)** The angular  
303 distribution of filaments within protoplasts is centered at  $90^\circ$  (SD  $25^\circ$ ,  $n=147$ ), similar to that of MreB  
304 motion in TagO-depleted, confined cells ( $90^\circ$ , SD  $36^\circ$ ,  $n=359$ ) and MreB motion in wild-type cells ( $88^\circ$ , SD  
305  $34^\circ$ ,  $n=1041$ ). **(ii)** In channels of varying widths ( $2$ ,  $4$  and  $5 \mu\text{m}$ ), the orientation of GFP-MreB filaments  
306 remains circumferential but the angular distribution becomes wider at increasing channel width ( $93^\circ$ , SD  
307  $34^\circ$ ,  $n=258$  at  $2 \mu\text{m}$ ), ( $81^\circ$ , SD  $35^\circ$ ,  $n=260$  at  $4 \mu\text{m}$ ) and ( $86^\circ$ , SD  $41^\circ$ ,  $n=203$  at  $5 \mu\text{m}$ ).

308

### 309 **MreB Filaments Orient Around Liposome Tubes *in vitro***

310 To test if MreB filaments are themselves sufficient to align along the predominant  
311 direction of membrane curvature, we assembled purified *T. maritima* MreB within  
312 liposomes and visualized it using electron cryo-electron microscopy and tomography.  
313 While controlling the final concentration of protein encapsulated within liposomes  $\leq 1 \mu\text{m}$   
314 is difficult, we were able to assemble MreB inside liposomes at high concentrations. At  
315 these concentrations, MreB filaments tubulated liposomes, creating rod-like shapes  
316 (Fig. 4A, S4, Movie S5). In tubulated regions, MreB filaments could be traced around  
317 the circumference of the liposome tube, while filaments in spherical regions were found  
318 in all possible orientations (Fig. 4A). At the highest concentrations, tubulated liposomes  
319 contained closely packed filament bundles, allowing us to observe a regular patterning  
320 of the canonical double filaments of MreB (Fig. 4B). Purified wild-type MreB did not bind



321 to the outside surface of small liposomes contained within larger ones (Fig. 4A),  
322 indicating that MreB filaments preferentially polymerize on inward (negative) curvatures,  
323 akin to the inner leaflet of the bacterial membrane. In the absence of MreB, liposomes  
324 are spherical, with no deformations (Fig. S4C). Together, this data suggests that MreB  
325 filaments themselves are sufficient to align along the predominant direction of  
326 membrane curvature, as observed here with laterally associated filaments. We note that  
327 the experimental limitations of the liposomal system, combined with the tendency of  
328 MreB filaments to self-associate make it difficult for us to acquire and study the  
329 alignment of single filaments *in vitro*. Also, it remains to be determined if membrane-  
330 associated MreB filaments exist as bundles or isolated filaments *in vivo*.

331

332 **Biophysical Modeling Suggests Highly Bent MreB Filaments Orient Along the**  
333 **Greatest Principal Curvature to Maximize Membrane Interactions, a Prediction**  
334 **Insensitive to Large Variations in Parameters**

335 The above observations demonstrate that MreB filaments sense and align along the  
336 direction of greatest principal curvature, i.e., the more curved inner surface of the rod  
337 circumference. The ultrastructure of MreB filaments provides a possible mechanism:  
338 MreB filaments are bent (Salje et al., 2011), with the membrane-interacting surface on  
339 the outer face of the bend (Fig. 4C). This bent conformation could cause filaments to  
340 preferentially orient along the curved rod circumference, rather than the flat rod length,  
341 to maximize the burial of hydrophobic moieties into the membrane, a mechanism  
342 suggested by previous theory (Wang and Wingreen, 2013).

343  
344 As the curvature of MreB filaments bound to liposomes is much greater (~200 nm  
345 diameter) than that of *B. subtilis* cells (~900 nm diameter), we performed analytical  
346 calculations to model how highly curved MreB filaments would align within a cell with a  
347 less curved surface (Fig. 4D-G, Supplemental Text 1). As many of the biochemical and  
348 physical parameters of MreB are still unknown, we first assumed a fixed set of  
349 parameters, and later verified that our results were robust over a large parameter range.  
350 We initially assumed a membrane interaction energy of 10 kT per monomer (calculated  
351 from residues involved in membrane associations (Salje et al., 2011)), and a similar  
352 Young's modulus to actin (2 GPa). We modeled filaments as elastic beams made of two  
353 protofilaments. In addition, we used the Helfrich free energy to model the energetics of  
354 membrane deformation, and accounted for the work done against turgor pressure due  
355 to changes in volume (Supplemental Text 1). These calculations indicate that the total  
356 energy is minimized when filaments orient along the direction of maximal curvature (Fig.  
357 4F) and that, importantly, the energy penalty for incorrectly-oriented filaments is much  
358 greater than the energy of thermal fluctuations. Interestingly, this modeling indicates a  
359 decrease in energetic preference for the preferred filament orientation as the radius of  
360 the cell is increased (Fig. 4F), a prediction in qualitative agreement with our  
361 observations of alignment in protoplasts. Furthermore, our calculations indicate that  
362 orientation is robust over a large, biologically relevant range of parameters, including  
363 the membrane binding energy, filament length, and filament Young's modulus (Fig. 4G).  
364

365 These calculations predict that filaments should orient circumferentially both if the  
366 membrane deforms to the filament (at low turgor pressures or if filaments are stiff) (Salje  
367 et al., 2011), or if filaments deform to the membrane (at high turgor pressures or if  
368 filaments are flexible) (Fig. 4E). Our experimental data demonstrates MreB filament  
369 alignment across a range of pressures: high within cells, low to none within liposomes,  
370 and a pressure between the two within osmotically-stabilized protoplasts. In the  
371 absence of turgor pressure, MreB filaments deform liposomes since it is energetically  
372 more favorable to bend the membranes than to bend the filaments, as observed in our  
373 *in vitro* data (Fig. 4A, S4). However, in live cells, our modeling predicts that MreB  
374 filaments cannot deform the inner membrane due to the large turgor pressure, and  
375 instead deform to match the greatest principal membrane curvature. Hence filaments  
376 create curvature in liposomes and sense it in cells.  
377

378 **Figure 4. *T. maritima* MreB filaments assembled in liposomes align perpendicular**  
 379 **to the rod axis.**

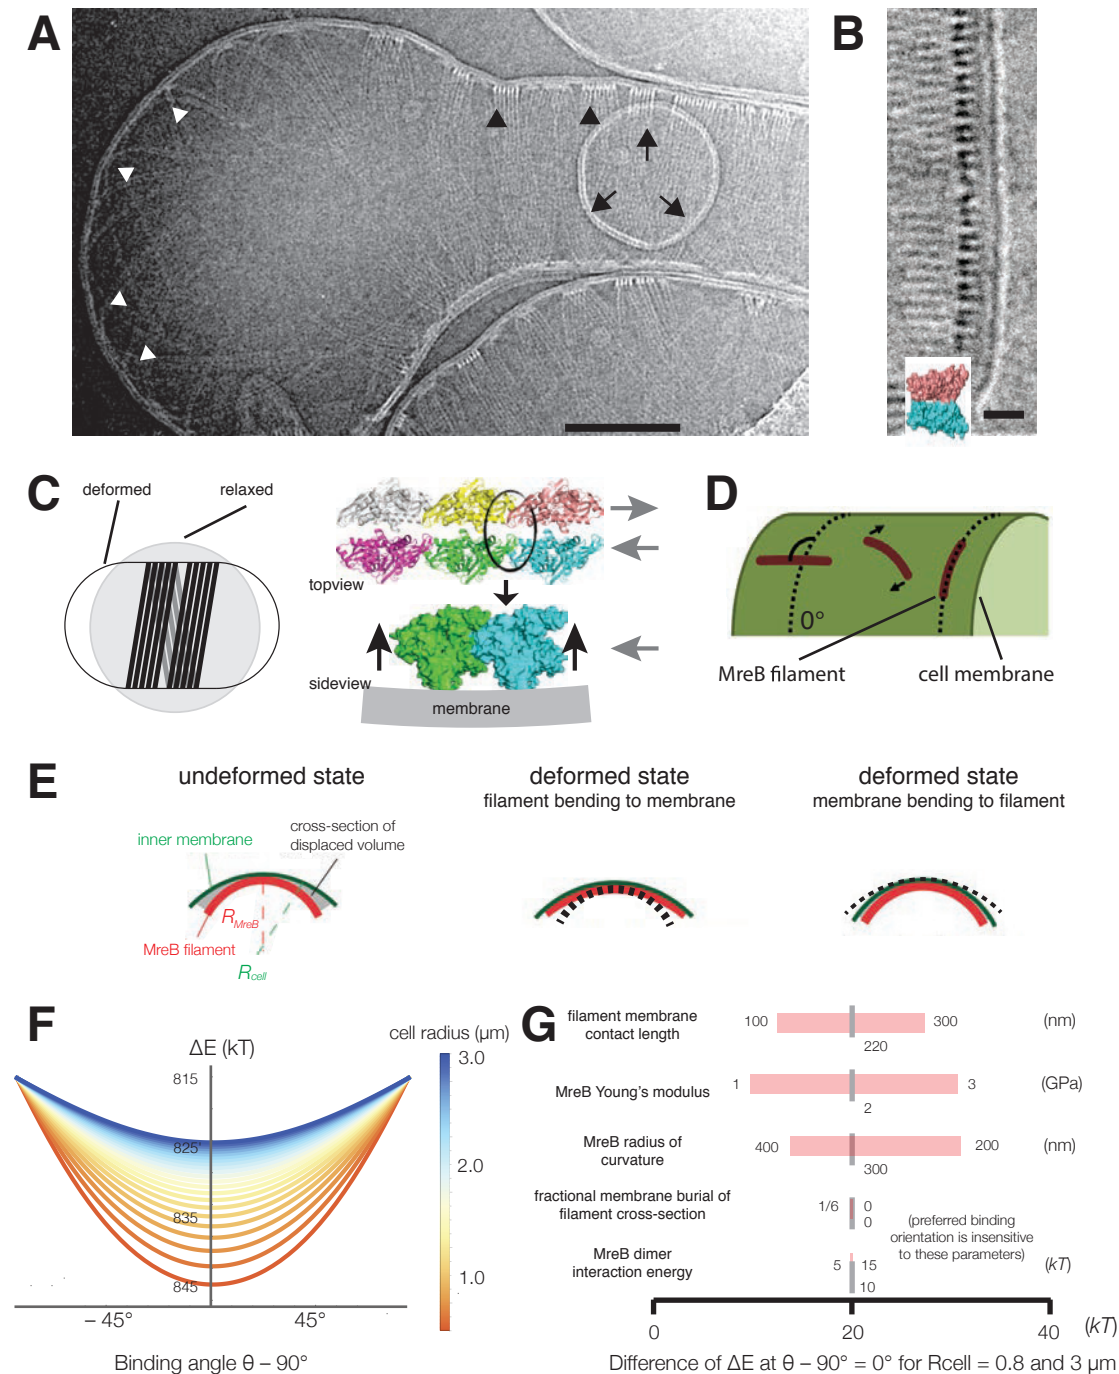

380  
 381 **(A)** Black arrowheads show aligned bundles of filaments in a tubulated liposome, white arrowheads show  
 382 unaligned bundles in a spherical region of the same liposome. Arrows show a positively curved surface

383 inside the liposome, to which no MreB filaments bind. Scale bar is 100 nm. See also Figure S4. **(B)** MreB  
384 in liposomes adopts a double-stranded antiparallel protofilament arrangement consistent with (van den  
385 Ent et al., 2014). Scale bar is 50 nm. **(C)** (*left*) Schematic drawing depicting the cause of the shape  
386 change from spherical to rod-shaped liposomes: MreB wants to attain greater curvature and since there  
387 are many filaments, they are laterally stabilized. As the liposome is much more easily deformable than  
388 cells, the resulting energy minimum is a deformed liposome with an MreB helix on the inside. (*right*)  
389 Model showing why the unusual architecture of MreB filaments might have been selected during  
390 evolution: its juxtaposed subunits in the two antiparallel protofilaments produce putative hinges that could  
391 be the region of bending for these filaments. Canonical F-actin filament architectures, with staggered  
392 subunits, would need bending within the subunits, which is less easily achieved. **Modeling of MreB –**  
393 **membrane interactions and filament orientation.** **(D, E)** Hydrophobic residues are located on the outer  
394 edge of the antiparallel MreB double filament, which is here modeled as an elastic cylindrical rod. To  
395 achieve maximum hydrophobic burial, membrane deformation, MreB bending, or a combination of the two  
396 may occur. **(F)** A plot of the change in total energy ( $\Delta E$ ) caused by the MreB-membrane interaction  
397 against the binding angle  $\theta$  for various cell radii shown in the color scheme on the right. Note that  $\Delta E$  is  
398 minimal at  $\theta=90^\circ$ , which agrees with the observed orientation of MreB binding and motion. At larger rod  
399 radii, the energetic well becomes flatter and MreB binding becomes more susceptible to thermal  
400 fluctuations and other sources of stochasticity, which would result in a broader angular distribution of  
401 filaments. **(G)** A sensitivity analysis of the model over a range of model parameters.

402

### 403 **Rod-Shape is Lost in a Global Manner, but Reforms Locally**

404 Together, the above data demonstrate that MreB filaments are sufficient to preferentially  
405 orient along the direction of greatest principal membrane curvature. In rod-shaped cells,  
406 this direction is along the rod circumference. As filaments move along their length, their  
407 orientation constrains the spatial activity of the PG synthetic enzymes such that new cell  
408 wall is inserted in a mostly circumferential direction (Hayhurst et al., 2008) to reinforce

409 rod shape (Chang and Huang, 2014; Yao et al., 1999). While the ability of MreB  
410 filaments to orient in pre-existing rods can help explain how rod shape is maintained, we  
411 also wanted to understand how MreB filaments facilitate the *de novo* formation of rod  
412 shape. To explore this, we observed how cells interconvert between spheres and rods.  
413  
414 We first examined how rod shape fails, by growing our TagO-inducible strain at  
415 induction levels that produced rods and then reducing the Mg<sup>2+</sup> concentration to induce  
416 them to convert to spheres. This transition revealed that rods convert into round cells by  
417 continuous swelling: once a rod begins to widen, it continues to do so until reaching a  
418 fully spherical state with no reversion during the process (Fig. 5A). Similar rod to sphere  
419 transitions could be attained by holding Mg<sup>2+</sup> constant while reducing TagO expression.  
420 Likewise, cells grown at intermediate TagO induction levels (8-12mM) grew as steady  
421 state populations of interconnected rods and spheres, indicating that cells underwent  
422 repeated cycles of rod shape formation followed by reversion to spheres (Fig. 1D, E).  
423 These results indicate that rod shape can be maintained only as long as the cell wall is  
424 sufficiently rigid to resist the internal turgor pressure.  
425  
426 We next examined how rod shape forms from round cells. As the recovery of  
427 protoplasted *B. subtilis* is so infrequent that it has never been directly visualized  
428 (Mercier et al., 2013), we assayed how round cells with preexisting cell walls convert  
429 back into rods, using three systems: 1) re-inducing WTA expression within TagO-  
430 depleted, spherical cells, 2) holding TagO expression beneath the rod/sphere transition

431 and increasing  $Mg^{2+}$  levels, and 3) re-inducing Pbp2a expression in spherical, Pbp2a-  
432 depleted cells. In all three cases, rods reformed in a discrete, local manner; spheres did  
433 not form into rods by progressively shrinking along one axis, but rather, rods abruptly  
434 emerged from one point on the cell, growing more rapidly than the parent sphere (Fig.  
435 5B, Movie S6, Movie S8). This morphology is similar to the initial outgrowth of  
436 germinating *B. subtilis* spores (Pandey et al., 2013). We occasionally observed another  
437 mode of recovery, occurring when round cells were constrained, or divided into, ovoid or  
438 near-rod shapes. Once these near-rod shaped cells formed, they immediately began  
439 rapid, rod-like elongation along their long axis (Fig. S5D).

440

#### 441 **Rods Form from Local Outward Bulges and Grow Faster than Non-Rod Shaped** 442 **Cells**

443 We focused on two salient features of the rod shape recoveries: 1) rod shape forms  
444 locally, most often at one point on the cell surface, and 2) once a rod-like region is  
445 formed, it appears self-reinforcing, both propagating rod shape and growing faster than  
446 adjacent or attached non-rod shaped cells.

447

448 We first wanted to understand how rod shape initiates *de novo* from spherical cell  
449 surfaces. By examining the initial time points of recoveries, we found that rods begin as  
450 small outward bulges: local regions of outward (positive Gaussian) curvature flanked by  
451 regions of inward (negative Gaussian) curvature (Fig. 5C). These initial outward bulges  
452 showed a width distribution similar to that of the later emerging rods (Fig. 5D). Once

453 these bulges formed, they immediately began rapid elongation into nascent rods, which  
454 would then thin down to wild type width over time. Bulge formation and rod recovery  
455 were independent of cell division, as cells depleted of FtsZ still recovered rod shape  
456 (Fig. S5B). Rather, these bulges appeared to arise randomly, evidenced by the fact that  
457 different cells produced rods at different times during WTA or Pbp2a depletion. We  
458 conclude that the appearance of a local outward bulge can act as the nucleating event  
459 of rod shape formation.

460  
461 As emerging rods appeared to grow faster than adjacent round cells, we tested if the  
462 doubling times of rod-shaped cells were faster than those of non-rods by measuring the  
463 doubling times in our inducible TagO strain at different induction levels using both OD<sub>600</sub>  
464 measurements and single cell microscopy under steady state conditions (Fig. 6B, S3C).  
465 This revealed a sharp transition in doubling time that matched the conditions of the  
466 rod/sphere transition: growth is slow when cells are spheres, yet greatly increases when  
467 cells are rods (Fig. S3C, S5A). Furthermore, the doubling times of recovering rods was  
468 similar to that of rods at steady state (Fig. S3C).

469  
470 We believe the lower doubling time of rods is likely due to cell shape and not another  
471 effect, such as the lack of WTAs, as 1) the doubling time of TagO-depleted cells  
472 confined in the microfluidic chambers matched that of wild type cells; and 2) both the  
473 doubling times and the boundary of the rod/sphere transition could be equivalently  
474 shifted by changing the Mg<sup>2+</sup> concentration (Fig. 1E, S1, S5A). Combined, these results



475 indicate that rod shape creates local, self-reinforcing regions that are poised for more  
476 rapid growth; once any small region of the cell approximates a rod shape, growth of the  
477 rod-like region is amplified, growing faster than other regions, and thereby outcompeting  
478 non-rod growth at the population level.

479

480 **Figure 5. Sphere to rod transitions occur locally and lead to faster growth.**

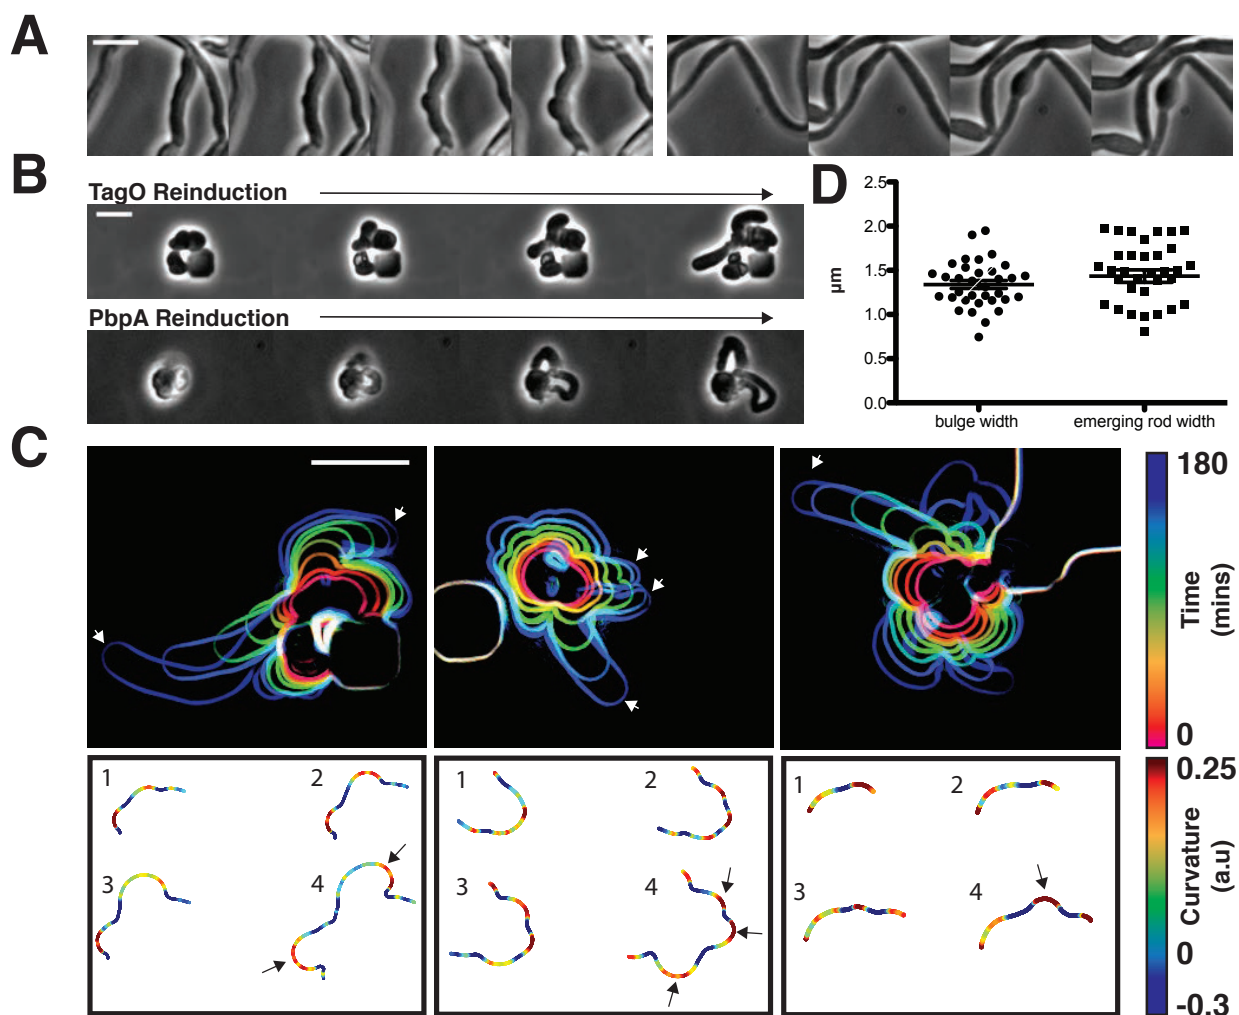

481  
482 **(A)** Loss of rod shape proceeds continuously and without reversals, as shown by BEG300 cells grown in  
483 12 mM xylose, shifted from 1mM  $\text{Mg}^{2+}$  to 100  $\mu\text{M}$   $\text{Mg}^{2+}$  on a pad. Frames are 5 min apart. **(B)** Increases in  
484 expression of *tagO* or *pbpA* from depleted spherical cells causes cells to emit rapidly elongating rods from

485 discrete points. (*Top*) BEG300 cells in 20 mM Mg<sup>2+</sup> were grown in 0 mM xylose for 4h, then transferred to  
486 a microfluidic chamber and grown in 0 mM xylose and 20 mM Mg<sup>2+</sup> for 1h. Following this, *tagO*  
487 expression was induced with 30 mM xylose at the first frame. (*Bottom*) BRB785 cells in 20 mM Mg<sup>2+</sup> were  
488 depleted of Pbp2a by growth in 0 mM IPTG for 4h. At the start of the frames, they were transferred to an  
489 agar pad containing 1mM IPTG to induce *pbpA* expression. Frames are 30 min apart. **(C)** Plots of cell  
490 contours as cells recover from TagO depletion: (*top*) cell outlines are colored in time red to blue (0-  
491 180min). White arrows indicate emerging rods; (*bottom*) heat maps of curvature show that rods emerge  
492 from small outward bulges (red) flanked by inward curvatures (blue). Black arrows indicate points where  
493 emerging rods form. **(D)** The width of initial bulges and the rods that emerge from them are highly similar,  
494 indicating the initial deformations may set the starting width of the rods. Error bars are SEM. All scale bars  
495 are 5  $\mu$ m.

496

## 497 **Rod-shape Formation Correlates with Aligned MreB Motion and Increased Glycan** 498 **Crosslinking**

499 We next sought to determine what features distinguished rods from round cells. As the  
500 elongation of rod-shaped cells requires a sufficiently rigid cell wall (Fig. 1D-E, 5A), the  
501 self-reinforcing growth of rods could arise from a few mutually compatible sources  
502 relative to round cells in our strain: 1) The arrangement of PG strands could be such to  
503 reinforce the rod (Amir and Nelson, 2012; Chang and Huang, 2014), 2) WTAs could be  
504 preferentially incorporated into rods, or 3) The extent of crosslinking of newly inserted  
505 material in the cell wall could be increased so as to make it more rigid (Loskill et al.,  
506 2014).

507

508 To assay the orientation of newly inserted cell wall, we imaged the motions of MreB as  
509 we induced TagO-depleted cells to recover into rods. This revealed that oriented MreB  
510 motion correlates with local shape: emerging rods displayed oriented MreB motion even  
511 at the initial points of their formation, while attached round parent cells displayed  
512 unaligned motion (Fig. 6A, Movie S7). This demonstrates that oriented MreB motion  
513 correlates with local geometry and does not arise from a global, cell spanning change.  
514 We next examined the overall cellular distribution of MreB in recovering cells with  
515 confocal microscopy. This revealed that, immediately prior to rod emergence, MreB  
516 transiently accumulated in a bright ring oriented perpendicular to the direction of rod  
517 emergence, most often occurring at the interface of the bulge and the round cells  
518 (Figure 6C, S5E).

519  
520 The local reinforcement of rod shape in recovering cells could arise from preferential  
521 incorporation of the cell wall rigidifying WTAs. As the WTA ligases have been reported  
522 to interact with MreB (Kawai et al., 2011), we tested if rod shape correlated with  
523 increased WTA accumulation in emerging rods. To test this, we labeled recovering cells  
524 with fluorescently labeled lectins that specifically bind to WTAs (Fig. S6A). Following  
525 TagO reinduction, WTAs in recovering cells had a disperse, diffuse distribution around  
526 the cell (Fig. S6B), equally present in the cell walls of both rods and spheres (Fig. 6B).  
527 To test if the WTA ligases move with MreB, we created fluorescent fusions to these  
528 proteins at their native locus and examined their dynamics with TIRFM. We were unable  
529 to observe any of the circumferential motions expected if the WTA ligases moved with

530 MreB; instead they appeared to be rapidly diffusing on the membrane (Fig. S6C, Movie  
531 S9, Supplementary Text 2).

532

533 Next, we used mucopeptide analysis to examine if there was a difference in the amount  
534 of glycan crosslinking between rods and spheres. This revealed that the PG  
535 surrounding spheres was significantly less crosslinked than rods (Fig. 6B, S6D). Thus,  
536 the cell wall in rods is more crosslinked, and therefore presumably more load bearing  
537 (Loskill et al., 2014). This result fits with the finding that WTA-depleted cell walls are  
538 thicker and more irregular (D'Elia et al., 2006). Similarly, studies of plant cell walls have  
539 shown that decreased crosslinking makes the cell wall more permeable to water,  
540 resulting in swollen, less rigid cell walls (Redgwell et al., 1997)(Ishii et al., 2001).

541

542 Previous studies have shown that the rate of PG incorporation is unchanged during the  
543 initial phases of depletion of components within the WTA pathway (Pooley et al., 1993).  
544 To observe whether both spheres and rods inserted new PG during the process of rod  
545 shape recovery in our assay, we used fluorescent D-amino-acids (FDAAs), which  
546 crosslink into newly inserted cell wall. We grew TagO-depleted cells in a microfluidic  
547 device in the presence of HADA, then switched the media to contain Cy3B-ADA as we  
548 re-induced TagO expression. During rod emergence, the old cell wall signal (HADA)  
549 remained in the sphere, while the emerging rod was almost entirely composed of new  
550 (Cy3B-ADA) material, confirming the discrete nature of rod shape recovery. However,

551 the attached spheres also incorporated Cy3B-ADA, indicating PG synthesis occurs in  
552 both rods and spheres during recovery (Fig. S5C).

553

554 **Figure 6. Cell wall crosslinking and growth are coupled to MreB-guided**  
555 **formation of rod shape.**

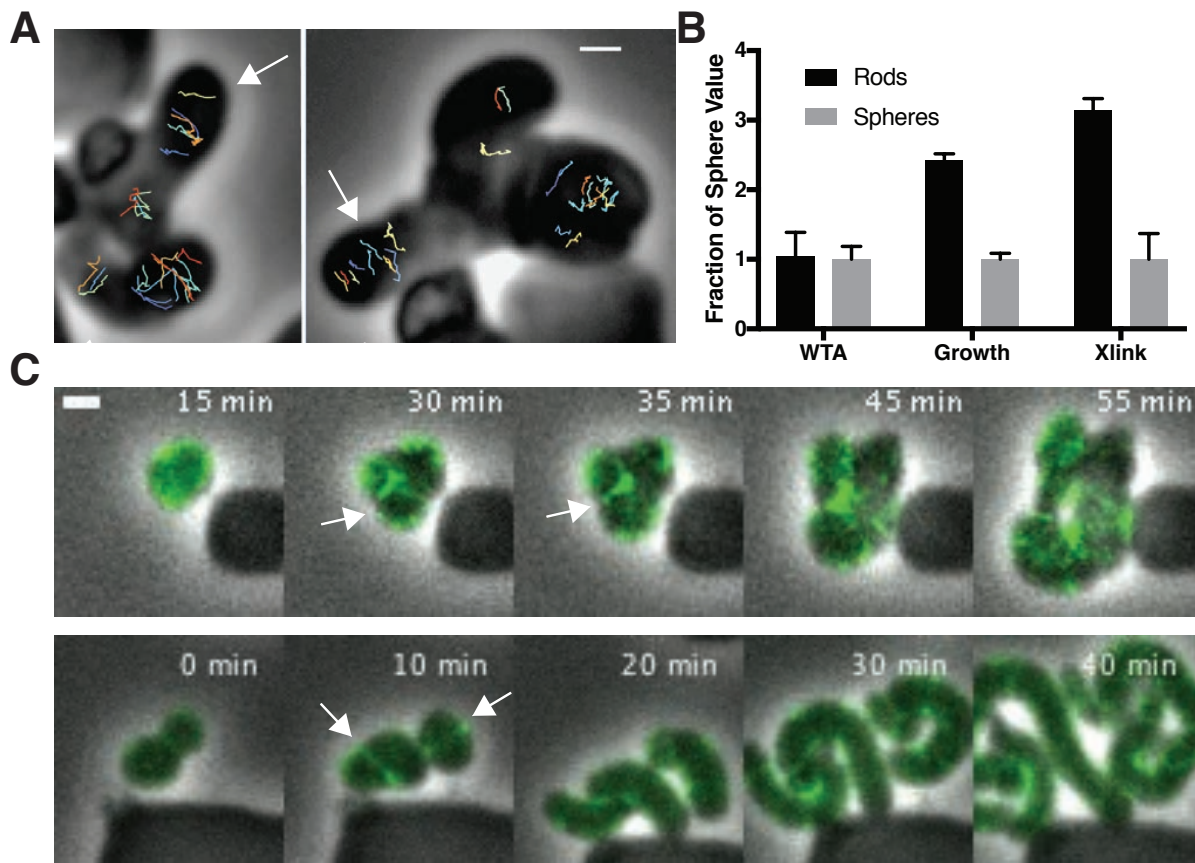

556

557 **(A)** (*left*) GFP-MreB trajectories during a sphere to rod transition. Emerging rods exhibit oriented MreB  
558 motion (white arrows) while attached round cells have unoriented motion. Scale bar is 1  $\mu$ m. **(B)** Fold  
559 change in the teichoic acid incorporation, doubling times (assayed by OD<sub>600</sub> measurements), and %  
560 crosslinked muropeptides of rods (inducible TagO with 30mM xylose in LB with 20 mM Mg<sup>2+</sup>) compared to  
561 spheres (grown in LB with 20 mM Mg<sup>2+</sup>). Error bars are SD. See also Figure S3C and S6. **(C)** During  
562 shape recoveries, immediately before rod emergence, MreB transiently accumulates in a bright ring  
563 where the bulge connects to the parent sphere. See also Figure S5E. Scale bar is 2  $\mu$ m.

564

565 In summary, this data gives new insights into what properties of the cell wall can be  
566 modulated to create and stabilize rod shape: rod shape is not formed by preferential  
567 localization of teichoic acids to rods, and both spheres and rods incorporate PG before  
568 and during rod shape recovery, in line with reports that PG synthesis is unchanged by  
569 the inhibition of WTA synthesis (Pooley et al., 1993). Rather, the only differences  
570 between rod shaped and round cells we observed were 1) oriented motion of MreB in  
571 rods, coupled with 2) an increased crosslinking of the inserted glycans. Thus, it appears  
572 that not only does MreB direct glycan insertion into circumferential hoops, but also these  
573 strands are more crosslinked, both properties are expected to increase the strength of  
574 the rod sidewalls (Loskill et al., 2014)(Yao et al., 1999). It may be that these two  
575 attributes are mechanistically linked, and a more oriented arrangement of glycan  
576 strands might provide a more optimal arrangement of peptides for crosslinking  
577 reactions. We note that as PG and WTA precursors share a common lipid carrier and  
578 WTAs affect hydrolase activity (Kasahara et al., 2016), their depletion may cause other  
579 rod-shape inhibiting PG abnormalities that we cannot observe.

580

## 581 **Discussion**

582 The above experiments give new insights into the mechanism by which MreB builds rod  
583 shape. First, the curved ultrastructure of MreB filaments causes them to orient and  
584 move along the direction of greatest membrane curvature, inserting material in that  
585 direction. Second, both the formation and propagation of rod shape occurs by a local,

586 self-reinforcing process: once a local region of rod shape forms, it propagates more rod  
587 shape. Finally, as far as we can determine, the primary differences between the growth  
588 of rods and non-rods is the circumferential orientation of MreB motion and increased  
589 glycan crosslinking.

590

591 Combined, these findings indicate that MreB filaments function as curvature-sensing  
592 rudders, a property that allows them to organize cell wall synthesis so that it builds rod  
593 shape: MreB filaments orient along the greatest membrane principal curvature, thereby  
594 constraining the activity of the associated PG synthases so that, as they move via their  
595 synthetic activity, they deposit highly crosslinked glycans oriented in the direction of that  
596 curvature, and this arrangement of glycan insertion reinforces rod shape. Even during  
597 the initial stages of rod shape formation, oriented MreB motion and rod shape always  
598 coincide, and the intrinsic curvature of MreB filaments suggests these properties cannot  
599 be uncoupled. This coupling appears to be an essential component of the Rod system:  
600 by linking filaments that orient along the greatest principal curvature to cell wall  
601 synthetic enzymes reinforcing that curvature, the Rod complex creates a local, self-  
602 organizing system that allows bacteria to both maintain rod shape and also establish  
603 rod shape *de novo*.

604

605 In established rods, we propose that MreB maintains and propagates rod shape via  
606 feedback between existing shape, filament orientation, and subsequent shape-  
607 reinforcing PG synthesis. As rod-shaped cells grow (Fig. 7A1), MreB filaments orient

608 along the more curved axis around the bacterial width (Fig. 7A2). Because MreB  
609 filaments always translocate along their length (Olshausen et al., 2013), filament  
610 orientation constrains the activity of the associated PG synthases such that new cell  
611 wall is inserted in bands predominantly oriented around the width of the rod (Fig. 7A3).  
612 This circumferential insertion of glycan strands, combined with a high level of  
613 crosslinking between them, yields a highly connected, anisotropic arrangement of  
614 material that reinforces rod shape (Fig. 7A1), which allows continued MreB filament  
615 orientation. This feedback loop can continue as long as the material within the rod  
616 sidewalls is sufficiently rigid to withstand the stresses arising from the internal turgor  
617 pressure, allowing the rod shape to be robust once it is formed.

618  
619 The coupling between the local sensing and reinforcement of differences in principal  
620 curvature could also allow the *de novo* formation of rod shape. In round cells, there is  
621 no difference in principal curvatures (Fig. 7B1), so MreB motion is isotropic. Rods do not  
622 form by squeezing these round cells across one axis, rather we observe them forming  
623 by the amplification of local rod-like regions. Given the rapid timescale of our recoveries,  
624 the Rod system appears poised to propagate any shape variations that create curved  
625 regions favorable to oriented MreB motion. Once regions of oriented motion are  
626 established, they self-propagate and elongate, creating a new rod shape and thus  
627 continued oriented MreB motion. The most common shape variation we observe  
628 preceding rod emergence is small outward bulges flanked by regions of inward  
629 curvature (Fig. 5C). It remains to be determined how these initial bulges form and what



630 cellular factors are involved in this process. They could arise from local changes in cell  
631 wall stiffness: a local softening of the cell wall has been observed to induce the rod  
632 shaped outgrowth of germinating fission yeast spores (Bonazzi et al., 2014).

633

634 The geometry at the interface of these outward bulges plays a central role in our model  
635 of rod shape formation. In three dimensions, the intersection at the bulge and the  
636 sphere creates a geometry that can establish a zone of aligned filaments: while both the  
637 parent sphere and the outward bulge have principal curvatures in the same direction  
638 (positive Gaussian curvature), the intersection of the sphere and bulge creates an  
639 interface with strong differences in principal curvatures, one inward, and one outward  
640 (negative Gaussian curvature). Upon entering these negatively curved regions it is  
641 energetically unfavorable for the inwardly curved MreB filaments to deviate from their  
642 preferred binding orientation, as our modeling indicates that this region presents a steep  
643 well in the energy profile for alignment (Fig 7B2 and Supplemental Text 1). Thus,  
644 filaments moving into this rim from either side would reorient to move along it, creating a  
645 concentrated band of filaments moving around the bulge neck. This concentrated ring of  
646 oriented MreB filaments may then construct a local region of rod shape that  
647 subsequently self-propagates into an emerging rod (Fig. 7B3). In support of this  
648 hypothesis, immediately preceding rod shape formation, we observe concentrated  
649 bands of MreB transiently appearing at the neck of emerging bulges (Fig. 6C, S5E).  
650 Likewise, similar patterns of MreB accumulation at points of negative Gaussian  
651 curvatures have been observed in recovering *E. coli* L-forms (Billings et al., 2014).

**Figure 7. Model for how MreB filament orientation along the greatest curvature both maintains and establishes rod shape.**

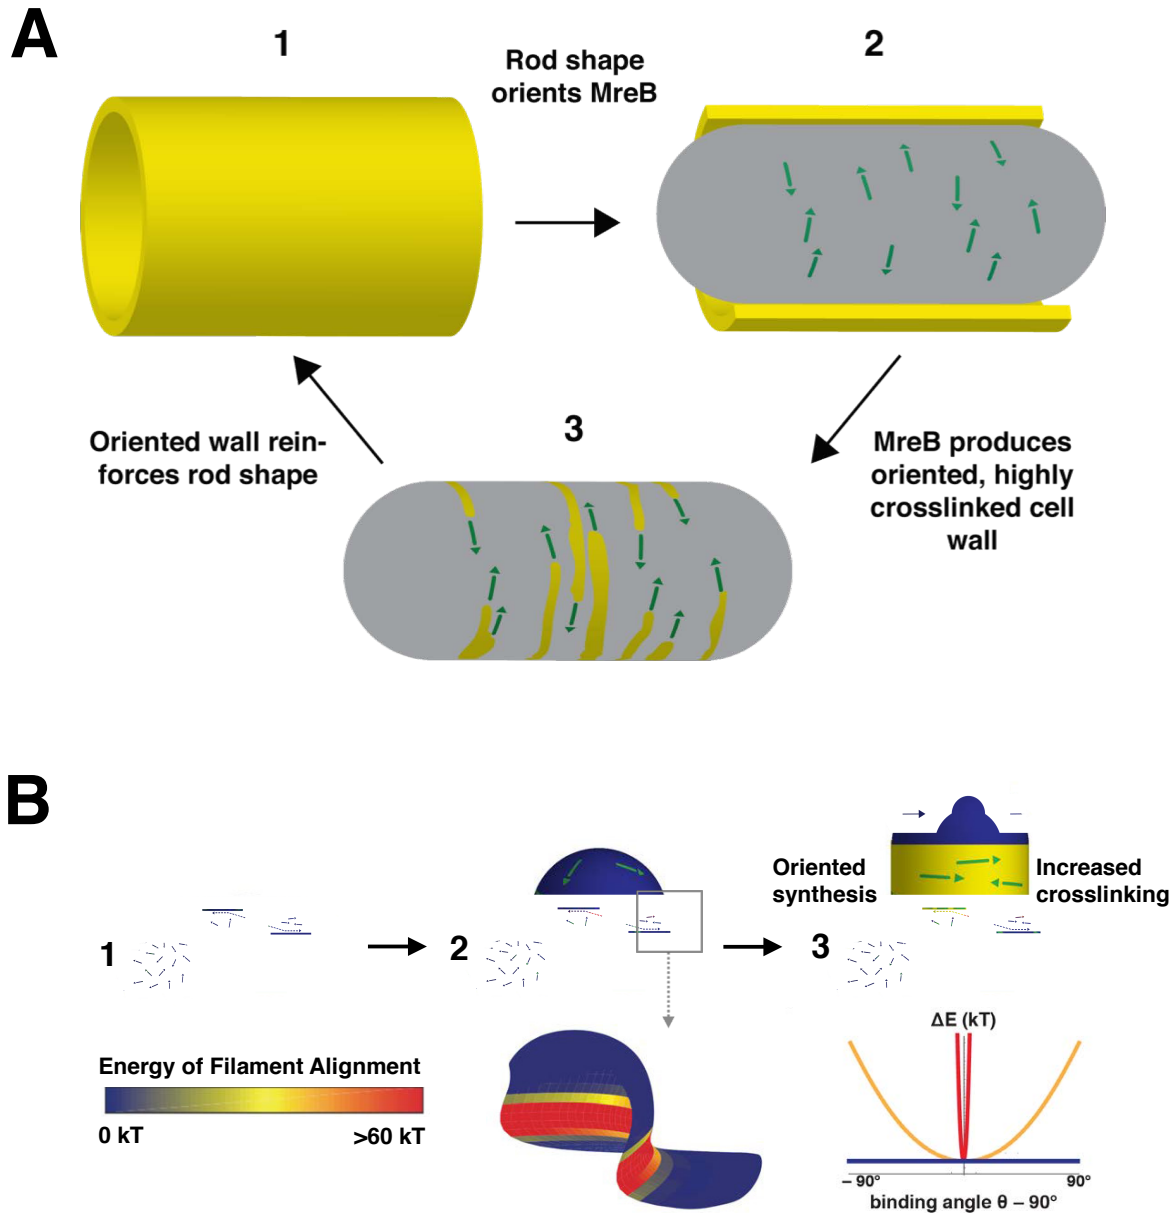

652

653 (A) Rod-shaped cells present a single curved axis along which MreB filaments orient (1). This orientation  
654 determines the direction of MreB motion (2), thus orienting the insertion of new cell wall material around  
655 the rod, and allowing an increased crosslinking between strands (3). This highly cross-linked,  
656 circumferential arrangement of cell wall material reinforces rod shape (1), leading to more aligned MreB

657 filaments, thus creating a local feedback between the orientation of MreB filaments, oriented cell wall  
658 synthesis, structural integrity of the rod, and overall rod shape. **(B)** MreB motion in spherical cells is  
659 isotropic (1), but the introduction of an outward bulge (2, upper) creates a curved geometry (red) at the  
660 neck of the bulge that initiates rod shape formation. Due to the high energy of alignment in this region, (2  
661 lower and chart), any filaments that encounter the neck of the bulge would prefer to align to point around  
662 the neck rather than cross it, creating a ring-shaped region of aligned MreB motion that nucleates rod  
663 formation. Repeated rounds of oriented synthesis around the ring could initiate the elongation of a rod  
664 from the initial bulge site (3), beyond which rod shaped elongation would be self-sustaining. Colors  
665 correspond to the difference of alignment energies along the two principal curvatures at the negatively-  
666 curved neck region (red), flat regions with one dimension of curvature (yellow), and the positively-curved  
667 sphere/bulge (blue).

668

669 The common observation of MreB accumulation at the necks of rod-producing bulges in  
670 both *E. coli* and *B. subtilis* hints at a solution to an outstanding discrepancy: Why do  
671 inwardly curved MreB filaments show an enriched localization at negative Gaussian  
672 curvatures (inward dimples or the more curved faces of bent cells) (Billings et al., 2014;  
673 Renner et al., 2013; Ursell et al., 2014), and how is this enrichment maintained as  
674 filaments move around the cell? The finding that MreB filaments align along the greatest  
675 curvature poses a solution: If the sharpness of filament alignment changes in response  
676 to the difference in principal curvatures in each region they pass through, areas of  
677 negative Gaussian curvature may act as points that focus the subsequent motion of  
678 filaments so that, on average, more filaments pass through these regions.

679

680 The tendency of MreB to align and move along the direction of greatest principal  
681 curvature may also explain the absence of MreB at cell poles. Consistent with our  
682 model for binding, we observed MreB filaments bound to the round poles of liposome  
683 tubes *in vitro* (Fig. 4A). In the cell, however, MreB filaments move directionally, and  
684 filaments entering the symmetrically curved pole in any orientation would quickly  
685 translocate out into the cylindrical cell body where they would reorient along the single  
686 direction of curvature.

687

688 While rod-shaped cells show both an increased rate of growth and oriented MreB  
689 motion, it is unlikely these phenomena are mechanistically linked. Rather, the  
690 decreased rate of growth of non-rods likely arises from a downstream effect of the lack  
691 of rod shape on cell physiology. Indeed, many spatial processes in *B. subtilis*, such as  
692 chromosome segregation and division site selection, read out and partition along the  
693 long axis established by rod shape (Jain et al., 2012). Thus, the slower doubling times  
694 observed in non-rod shaped cells may arise from the improper spatial organization of  
695 these processes, or stress responses to this spatial disarray.

696

697 As the curvature of membrane-bound MreB filaments (200nm) observed *in vitro* is much  
698 greater than the cell diameter (900nm), these findings suggest that the curvature of  
699 MreB filaments does not define a specific cell radius; rather filament curvature acts to  
700 orient PG synthesis to maintain (Harris et al., 2014) or reduce cell diameter. If the  
701 curvature of MreB filaments reflects the smallest possible cell diameter, bacterial width

702 may be specified by opposing actions from the two spatially distinct classes of PG  
703 synthases: a decreasing, “thinning” activity from the action of MreB and its associated  
704 SEDS family PG synthases, and an increasing “fattening” activity from the non-MreB  
705 associated Class A PG synthases.

706

## 707 **Conclusion**

708 To construct regular, micron-spanning shapes made of covalently crosslinked material,  
709 nature must devise strategies for coordinating the activities of disperse, nanometer-  
710 scale protein complexes. This work reveals that the role of MreB in creating rod shape  
711 is to locally sense and subsequently reinforce differences in principal curvatures. The  
712 local, short-range feedback between differences in curvature, MreB orientation, and  
713 shape-reinforcing cell wall synthesis provides a robust, self-organizing mechanism for  
714 the stable maintenance and rapid reestablishment of rod shape, allowing the local  
715 activity of short MreB filaments to guide the emergence of a shape many times their  
716 size.

717

## 718 **Author Contributions**

719 All authors contributed intellectual and editorial work to the development of the  
720 manuscript. S.H., C.N.W., and E.C.G. designed, performed, and interpreted  
721 experiments. P.S., T.I., and J.L. contributed the electron microscopy work shown in Fig.  
722 4. F.W. and A.A. contributed biophysical modeling work shown in Fig. 4, Fig. 7, and  
723 supplemental text. L.D.R performed microfluidic device fabrication. K.S. and S.W.

724 performed peptidoglycan crosslinking analysis. Y.S. wrote software for growth analysis.

725 A W. B. performed the FtsZ inhibition experiments.

726

## 727 **Acknowledgements**

728 We thank T. Norman, N. Lord, and M. Cabeen for help with PDMS molds and  
729 microfluidics; M. Dion and M. Kapoor for strains; E. Kuru, Y. Brun, and M.  
730 VanNieuwenhze for FDAAs; G. Billings, S Van Teeffelen, and T. Ursell for helpful  
731 discussion; T. Bharat for help with electron microscopy, and S. Layer for advice and  
732 inspiration. This work was funded by National Institutes of Health Grant DP2AI117923-  
733 01, a Smith Family Award, a Searle Scholar Fellowship (to E. G.), a Sloan Foundation  
734 Award (to A.A), an NSF GFRP to (F. W), the Medical Research Council (U105184326 to  
735 J.L.) and the Wellcome Trust (095514/Z/11/Z to J. L.). This work was performed in part  
736 at the Center for Nanoscale Systems at Harvard University, supported by NSF ECS-  
737 0335765. S.H. is a HHMI International Student Research Fellow. K.S. was funded by  
738 NIH R01 GM076710.  
739

## 740 **References**

741 Amir, A., and Nelson, D.R. (2012). Dislocation-mediated growth of bacterial cell walls.  
742 *Proc Natl Acad Sci USA* *109*, 9833–9838.

743 Atilano, M.L., Pereira, P.M., Yates, J., Reed, P., Veiga, H., Pinho, M.G., and Filipe, S.R.  
744 (2010). Teichoic acids are temporal and spatial regulators. *Proc Natl Acad Sci USA* *107*,  
745 18991–18996.

746 Balyuzi, H., Reaveley, D.A., and Burge, R.E. (1972). X-ray diffraction studies of cell  
747 walls and peptidoglycans from Gram-positive bacteria. *Nature*.

748 Baskin, T.I. (2005). Anisotropic expansion of the plant cell wall. *Annu. Rev. Cell Dev.*  
749 *Biol.* *21*, 203–222.

750 Billings, G., Ouzounov, N., Ursell, T., Desmarais, S.M., Shaevitz, J., Gitai, Z., and  
751 Huang, K.C. (2014). De novo morphogenesis in L-forms via geometric control of cell  
752 growth. *Mol Microbiol* *93*, 883–896.

753 Bonazzi, D., Julien, J.-D., Romao, M., Seddiki, R., Piel, M., Boudaoud, A., and Minc, N.  
754 (2014). Symmetry breaking in spore germination relies on an interplay between polar  
755 cap stability and spore wall mechanics. *Dev. Cell* *28*, 534–546.

756 Bringmann, M., Landrein, B., Schudoma, C., Hamant, O., Hauser, M.-T., and Persson,

- 757 S. (2012). Cracking the elusive alignment hypothesis: the microtubule-cellulose  
758 synthase nexus unraveled. *Trends Plant Sci.* *17*, 666–674.
- 759 Chang, F., and Huang, K.C. (2014). How and why cells grow as rods. *BMC Biol.* *12*, 54.
- 760 Cho, H., Wivagg, C.N., Kapoor, M., Barry, Z., Rohs, P.D.A., Suh, H., Marto, J.A.,  
761 Garner, E.C., and Bernhardt, T.G. (2016). Bacterial cell wall biogenesis is mediated by  
762 SEDS and PBP polymerase families functioning semi-autonomously. *Nat Microbiol* *1*,  
763 16172.
- 764 D'Elia, M.A., Millar, K.E., Beveridge, T.J., and Brown, E.D. (2006). Wall Teichoic Acid  
765 Polymers Are Dispensable for Cell Viability in *Bacillus subtilis*. *Journal of Bacteriology*  
766 *188*, 8313–8316.
- 767 Defeu Soufo, H.J., and Graumann, P.L. (2006). Dynamic localization and interaction  
768 with other *Bacillus subtilis* actin-like proteins are important for the function of MreB. *Mol*  
769 *Microbiol* *62*, 1340–1356.
- 770 Dempwolff, F., Reimold, C., Reth, M., and Graumann, P.L. (2011). *Bacillus subtilis*  
771 MreB orthologs self-organize into filamentous structures underneath the cell membrane  
772 in a heterologous cell system. *PLoS ONE* *6*, e27035.
- 773 Domínguez-Escobar, J., Chastanet, A., Crevenna, A.H., Fromion, V., Wedlich-Söldner,  
774 R., and Carballido-Lopez, R. (2011). Processive movement of MreB-associated cell wall  
775 biosynthetic complexes in bacteria. *Science* *333*, 225–228.
- 776 Gan, L., Chen, S., and Jensen, G.J. (2008). Molecular organization of Gram-negative  
777 peptidoglycan. *Proc Natl Acad Sci USA* *105*, 18953–18957.
- 778 Garner, E.C., Bernard, R., Wang, W., Zhuang, X., Rudner, D.Z., and Mitchison, T.  
779 (2011). Coupled, circumferential motions of the cell wall synthesis machinery and MreB  
780 filaments in *B. subtilis*. *Science* *333*, 222–225.
- 781 Harris, L.K., Dye, N.A., and Theriot, J.A. (2014). A *Caulobacter* MreB mutant with  
782 irregular cell shape exhibits compensatory widening to maintain a preferred surface  
783 area to volume ratio. *Mol Microbiol* *94*, 988–1005.
- 784 Hayhurst, E.J., Kailas, L., Hobbs, J.K., and Foster, S.J. (2008). Cell wall peptidoglycan  
785 architecture in *Bacillus subtilis*. *Proc Natl Acad Sci USA* *105*, 14603–14608.
- 786 Holtje, J. (1998). Growth of the stress-bearing and shape-maintaining murein sacculus  
787 of *Escherichia coli*. *Microbiol Mol Biol Rev* *62*, 181–203.
- 788 Ishii, T., Matsunaga, T., and Hayashi, N. (2001). Formation of Rhamnogalacturonan II-  
789 Borate Dimer in Pectin Determines Cell Wall Thickness of Pumpkin Tissue. *Plant*  
790 *Physiol.* *126*, 1698–1705.

- 791 Jain, I.H., Vijayan, V., and O'Shea, E.K. (2012). Spatial ordering of chromosomes  
792 enhances the fidelity of chromosome partitioning in cyanobacteria. *Proc Natl Acad Sci*  
793 *USA* *109*, 13638–13643.
- 794 Jones, L.J., Carballido-López, R., and Errington, J. (2001). Control of cell shape in  
795 bacteria: helical, actin-like filaments in *Bacillus subtilis*. *Cell* *104*, 913–922.
- 796 Kasahara, J., Kiriya, Y., Miyashita, M., Kondo, T., Yamada, T., Yazawa, K.,  
797 Yoshikawa, R., and Yamamoto, H. (2016). Teichoic Acid Polymers Affect Expression  
798 and Localization of dl-Endopeptidase LytE Required for Lateral Cell Wall Hydrolysis in  
799 *Bacillus subtilis*. *Journal of Bacteriology* *198*, 1585–1594.
- 800 Kawai, Y., Marles-Wright, J., Cleverley, R.M., Emmins, R., Ishikawa, S., Kuwano, M.,  
801 Heinz, N., Bui, N.K., Hoyland, C.N., Ogasawara, N., et al. (2011). A widespread family  
802 of bacterial cell wall assembly proteins. *Embo J.* *30*, 4931–4941.
- 803 Kawai, Y., Mercier, R., and Errington, J. (2014). Bacterial cell morphogenesis does not  
804 require a preexisting template structure. *Curr. Biol.* *24*, 863–867.
- 805 Loskill, P., Pereira, P.M., Jung, P., Bischoff, M., Herrmann, M., Pinho, M.G., and  
806 Jacobs, K. (2014). Reduction of the peptidoglycan crosslinking causes a decrease in  
807 stiffness of the *Staphylococcus aureus* cell envelope. *Biophys J* *107*, 1082–1089.
- 808 Matias, V.R.F., and Beveridge, T.J. (2005). Cryo-electron microscopy reveals native  
809 polymeric cell wall structure in *Bacillus subtilis* 168 and the existence of a periplasmic  
810 space. *Mol Microbiol* *56*, 240–251.
- 811 Mercier, R., Kawai, Y., and Errington, J. (2013). Excess membrane synthesis drives a  
812 primitive mode of cell proliferation. *Cell* *152*, 997–1007.
- 813 Olshausen, P.V., Defeu Soufo, H.J., Wicker, K., Heintzmann, R., Graumann, P.L., and  
814 Rohrbach, A. (2013). Superresolution imaging of dynamic MreB filaments in *B. subtilis*--  
815 a multiple-motor-driven transport? *Biophys J* *105*, 1171–1181.
- 816 Ouzounov, N., Nguyen, J.P., Bratton, B.P., Jacobowitz, D., Gitai, Z., and Shaevitz, J.W.  
817 (2016). MreB Orientation Correlates with Cell Diameter in *Escherichia coli*. *Biophys J*  
818 *111*, 1035–1043.
- 819 Pandey, R., Beek, Ter, A., Vischer, N.O.E., Smelt, J.P.P.M., Brul, S., and Manders,  
820 E.M.M. (2013). Live cell imaging of germination and outgrowth of individual *Bacillus*  
821 *subtilis* spores; the effect of heat stress quantitatively analyzed with SporeTracker.  
822 *PLoS ONE* *8*, e58972.
- 823 Paredez, A.R., Somerville, C.R., and Ehrhardt, D.W. (2006). Visualization of cellulose  
824 synthase demonstrates functional association with microtubules. *Science* *312*, 1491–  
825 1495.



- 826 Pooley, H.M., Abellan, F.-X., and Karamata, D. (1993). Wall Teichoic Acid,  
827 Peptidoglycan Synthesis and Morphogenesis in *Bacillus Subtilis*. In *Bacterial Growth*  
828 *and Lysis*, (Boston, MA: Springer, Boston, MA), pp. 385–392.
- 829 Redgwell, R.J., MacRae, E., Hallett, I., Fischer, M., and Perry, J. (1997). In vivo and in  
830 vitro swelling of cell walls during fruit ripening. *Planta*.
- 831 Renner, L.D., Eswaramoorthy, P., Ramamurthi, K.S., and Weibel, D.B. (2013). Studying  
832 biomolecule localization by engineering bacterial cell wall curvature. *PLoS ONE* *8*,  
833 e84143.
- 834 Salje, J., van den Ent, F., de Boer, P., and Löwe, J. (2011). Direct membrane binding by  
835 bacterial actin MreB. *Mol Cell* *43*, 478–487.
- 836 Soufo, H.J.D., and Graumann, P.L. (2010). *Bacillus subtilis* MreB paralogues have  
837 different filament architectures and lead to shape remodelling of a heterologous cell  
838 system. *Mol Microbiol* *78*, 1145–1158.
- 839 Thomas, K.J., and Rice, C.V. (2014). Revised model of calcium and magnesium binding  
840 to the bacterial cell wall. *Biometals* *27*, 1361–1370.
- 841 Ursell, T.S., Nguyen, J., Monds, R.D., Colavin, A., Billings, G., Ouzounov, N., Gitai, Z.,  
842 Shaevitz, J.W., and Huang, K.C. (2014). Rod-like bacterial shape is maintained by  
843 feedback between cell curvature and cytoskeletal localization. *Proc Natl Acad Sci USA*  
844 *111*, E1025–E1034.
- 845 van den Ent, F., Amos, L., and Löwe, J. (2001). Bacterial ancestry of actin and tubulin.  
846 *Curr. Opin. Microbiol.* *4*, 634–638.
- 847 van den Ent, F., Izoré, T., Bharat, T.A., Johnson, C.M., and Löwe, J. (2014). Bacterial  
848 actin MreB forms antiparallel double filaments. *Elife* *3*, e02634.
- 849 van Teeffelen, S., Wang, S., Furchtgott, L., Huang, K.C., Wingreen, N.S., Shaevitz,  
850 J.W., and Gitai, Z. (2011). The bacterial actin MreB rotates, and rotation depends on  
851 cell-wall assembly. *Proc Natl Acad Sci USA* *108*, 15822–15827.
- 852 Verwer, R.W., Beachey, E.H., Keck, W., Stoub, A.M., and Poldermans, J.E. (1980).  
853 Oriented fragmentation of *Escherichia coli* sacculi by sonication. *Journal of Bacteriology*  
854 *141*, 327–332.
- 855 Wachi, M., and Matsushashi, M. (1989). Negative control of cell division by *mreB*, a gene  
856 that functions in determining the rod shape of *Escherichia coli* cells. *Journal of*  
857 *Bacteriology* *171*, 3123–3127.
- 858 Wang, S., and Wingreen, N.S. (2013). Cell shape can mediate the spatial organization  
859 of the bacterial cytoskeleton. *Biophysical Journal* *104*, 541–552.

- 860 Wyrick, P.B., and Rogers, H.J. (1973). Isolation and characterization of cell wall-  
861 defective variants of *Bacillus subtilis* and *Bacillus licheniformis*. *Journal of Bacteriology*  
862 *116*, 456–465.
- 863 Yao, X., Jericho, M., Pink, D., and Beveridge, T. (1999). Thickness and elasticity of  
864 gram-negative murein sacculi measured by atomic force microscopy. *Journal of*  
865 *Bacteriology* *181*, 6865–6875.
- 866

## 867 Supplemental Figures

868 **S1– Varying magnesium levels in the growth medium changes cell shape. Related**  
869 **to Figure 1.**

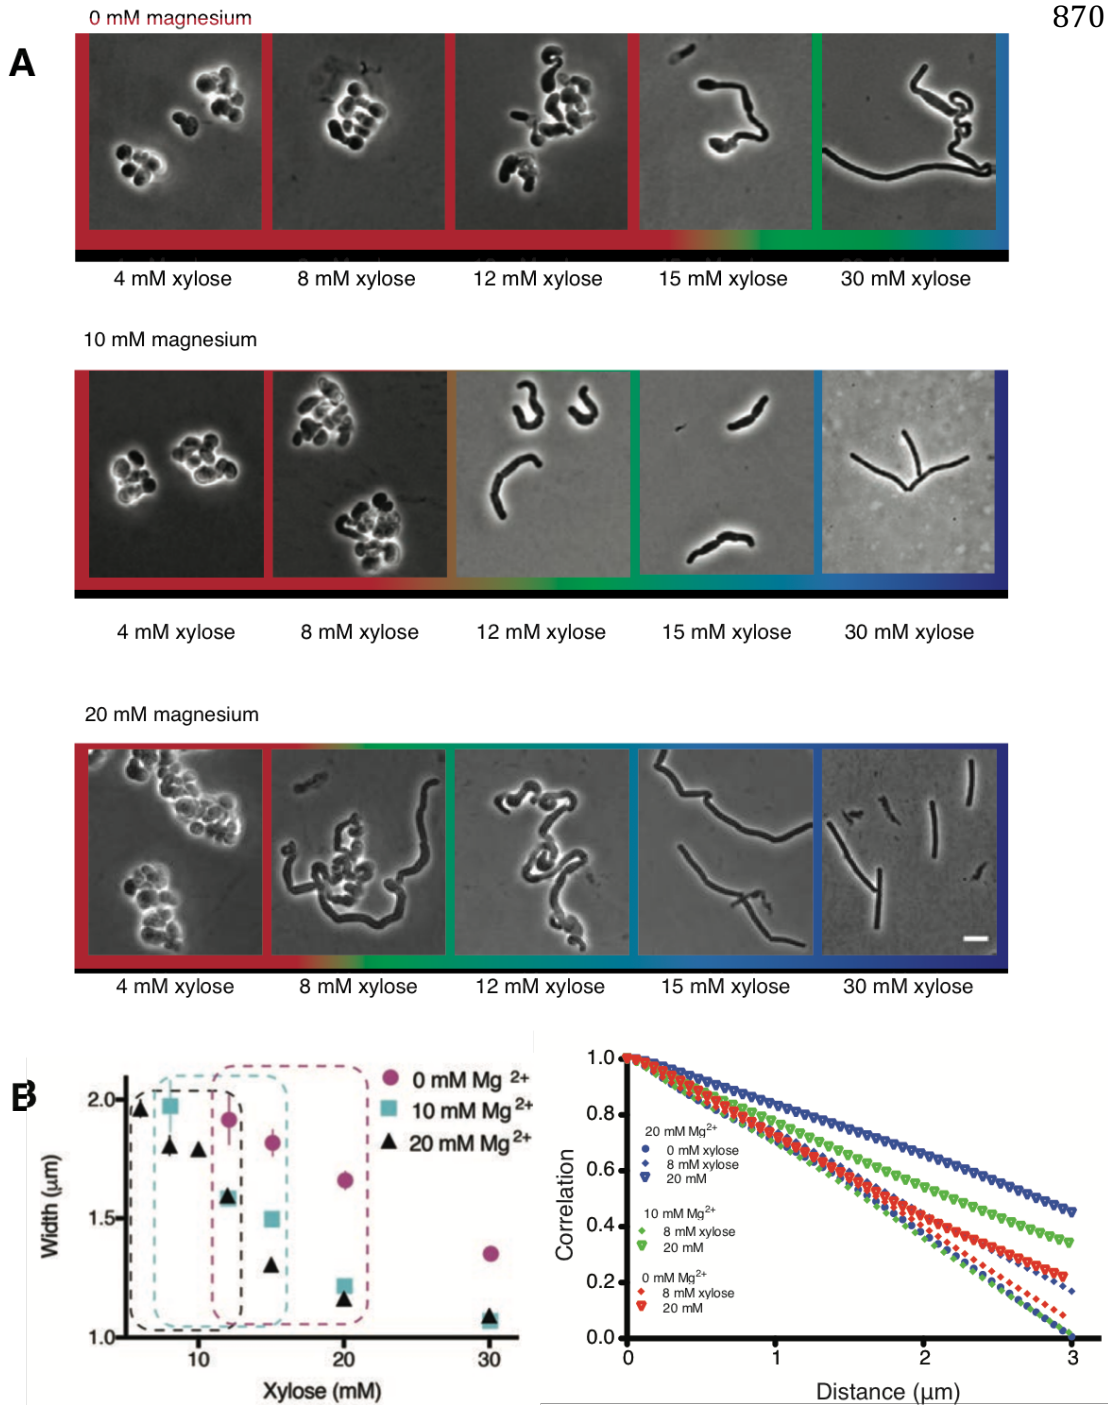

871

872 **(A)** TagO inducible cells grown in LB supplemented with varying  $Mg^{2+}$  levels (0, 10 and 20 mM), show  
 873 similar trends in cell shape across increasing xylose concentrations, with the appearance of more rod-  
 874 shaped cells that become thinner as xylose levels increase. Exogenous  $Mg^{2+}$  reduces the amount of  
 875 TagO induction needed for rod shape, evidenced by shift in the amount of xylose required to form rods as  
 876  $Mg^{2+}$  is increased. (Color Outlines: Blue = rods, Green = Mixed rods and non-rods, Red = non-rods). **(B)**  
 877 **Left** Plot of cell width as a function of TagO induction at different  $Mg^{2+}$  concentrations (error bars are  
 878 SEM). Areas not plotted at lower xylose levels are regions where cells are round, with no width axis.  
 879 Dotted rectangles mark conditions where both round cells and wide rods exist. Error bars are Standard  
 880 Error of the Mean (SEM). **Right** At low xylose and magnesium levels, tangential correlation along the cell  
 881 contours falls off faster, indicating loss of rod shape. Correlation of angles was calculated as described in  
 882 methods. The curves shown are population averages of tangential correlations at selected xylose and  
 883 magnesium concentrations. A cutoff of 3  $\mu$  m is applied as this is the mean cell length of *B. subtilis*.

884

885 **S2 (A-E) – Relationships between cell width, MreB orientation, and cell shape.**  
 886 **Related to Figure 2.**

**S2A – Mean dot product of MreB track pairs.**  
 Related to Figure 2E.

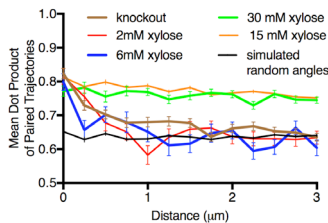

**S2B – Distribution of track angles to long axis**  
 at various TagO levels. Related to Figure 2E.

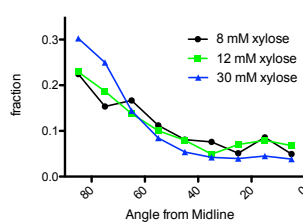

**S2C Median angle from cell long axis as a**  
 function of cell width. Related to Figure 2E.

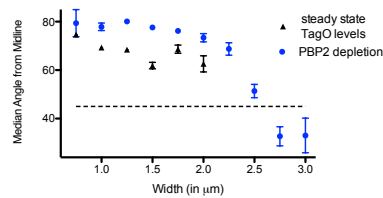

**S2D – Cells become rounder during**  
 Pbp2A/PbpH depletion. Related to Figure 2D.

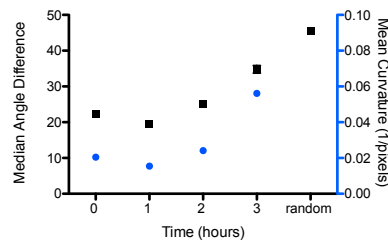

**S2E Cell roundness as a ratio of principal**  
 curvatures. Related to Figure 2E.

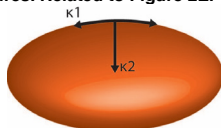

887 **(A)** The mean dot product of MreB track pairs vs. distance between the pairs was calculated and binned  
 888 at 0.25  $\mu$  m intervals. This shows a high alignment between pairs across the cell length for rods at high  
 889 xylose (15 and 30mM). Round cells (2 and 6mM xylose) show a high alignment at very short distances (<  
 890 500 nm), beyond which alignment falls off rapidly, approaching the value expected for randomly oriented  
 891 angles (black line represents a simulation of a uniform angular distribution). **(B)** MreB filament motion is  
 892 predominantly circumferentially oriented over a range of xylose levels (8-30mM) even though cells show  
 893 varying widths. At 8 and 12 mM xylose, cells are a mix of rods and spheres, and therefore angles were  
 894 only calculated for cells with identifiable long axes. **(C)** Median angle from the long axis of cells as a  
 895 function of cell width at steady state TagO levels and PBP2a depletions (shown separately). **(D)** Mean  
 896 sidewall curvature of cells increases during a Pbp2a/PbpH depletion (blue circles), along with a decrease  
 897 in aligned MreB motion (black squares). **(E)** The principal curvatures along the cell length ( $\kappa_1$ ) and cell  
 898 width ( $\kappa_2$ ) are calculated and the ratio  $\kappa_1/\kappa_2$  is taken as a measure of cell roundness. Cells become  
 899 round as this ratio approaches 1. All error bars are SEM.

900

901 **S3 - TagO Levels and Confinement. Related to Figure 3.**

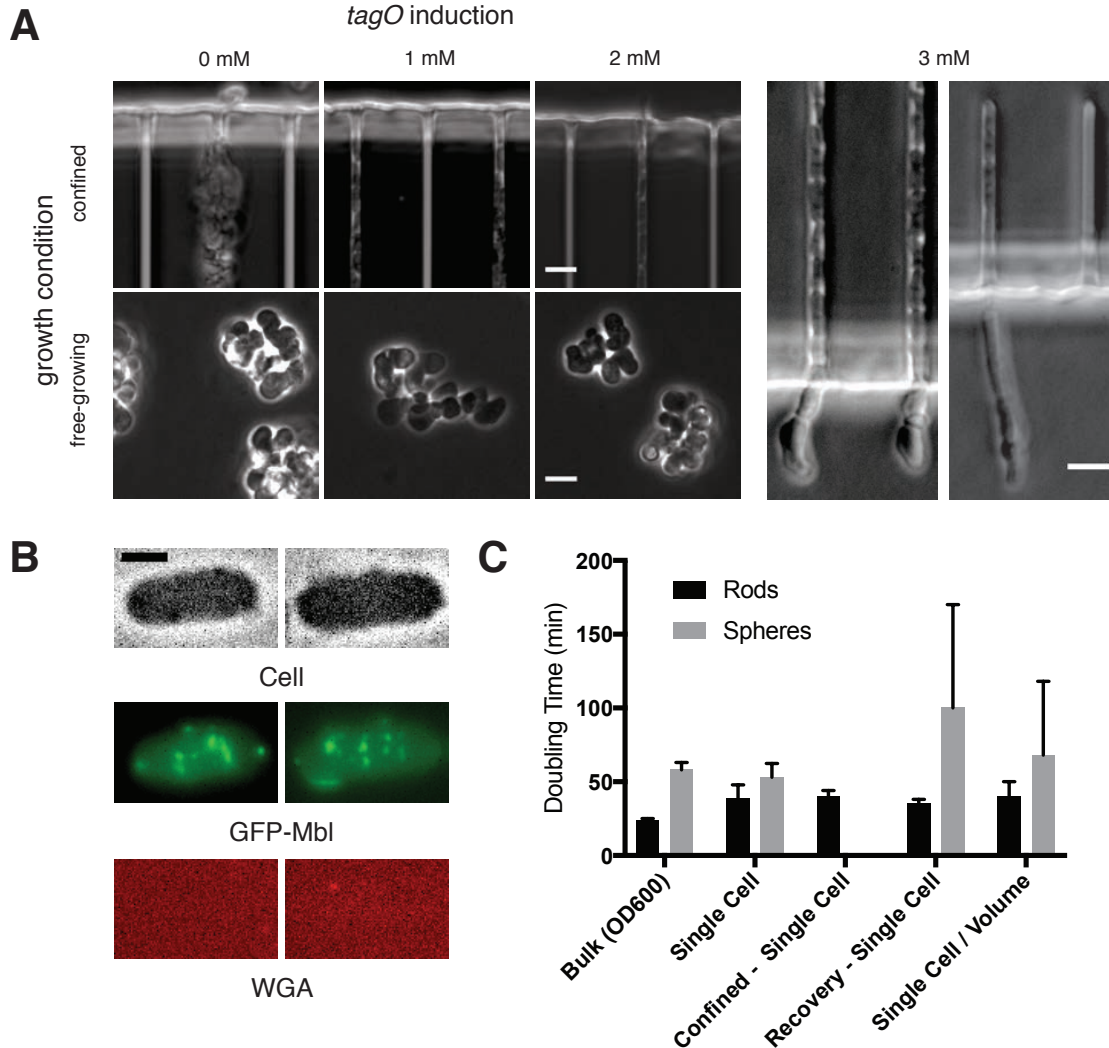

902  
 903 **(A)** Microfluidic confinement controls cell shape in cells with low TagO levels. (*Left*) Phase contrast  
 904 images of BEG300 grown under differing teichoic acid induction levels in bulk culture or confined in  
 905 chambers. (*Right*) Cells swell upon escaping from confinement. Swelling is visible both at initial stages of  
 906 depletion, corresponding to when MreB movies were collected (left panel, cf. Figure 3C and  
 907 Supplementary Movie 3), or at longer stages when cells were chained (right panel). Scale bars = 5  $\mu$  m.  
 908 **(B)** Panels showing images of phase contrast, GFP-Mbl, and Alexa455-conjugated WGA of a  
 909 representative protoplast confined into rod shape. MreB filaments are aligned along the cell  
 910 circumference, (middle panel), but do not regrow cell wall as indicated by the lack of signal in the  
 911 Alexa455 channel. Scale bars are 2  $\mu$  m. **(C)** Doubling time of BEG300 in different conditions. “Bulk”  
 912 indicates cultures grown in liquid suspension and measured by OD<sub>600</sub>. “Single Cell” indicates cells were  
 913 grown under agarose pads, with doubling time measured by assaying the change in cell area over time  
 914 using phase contrast microscopy. “Confined - Single Cell” indicates the doubling time of cell area of  
 915 TagO-depleted cells confined into rod shape in microchambers as in Figure 3A and S3A; “Recovery -  
 916 Single Cell” is the single-cell doubling time (in volume) of TagO-depleted cells during rod shape recovery  
 917 in a cellASIC microfluidic device as in Figure 5B. Note that spherical cells in these recoveries show a  
 918 slower doubling time with a larger standard deviation due to a subpopulation of cells dying during the  
 919 experiment; “Single cell / Volume” indicates the doubling time of the volume of single cells grown in a  
 920 cellASIC microfluidic device. As this chamber has a fixed Z height, cell volume can be approximated from  
 921 measures of the 2D area. Error bars are standard deviation.

922 **S4 – *T. maritima* MreB filaments assembled in liposomes support alignment to**  
923 **rod axis. Related to Figure 4.**

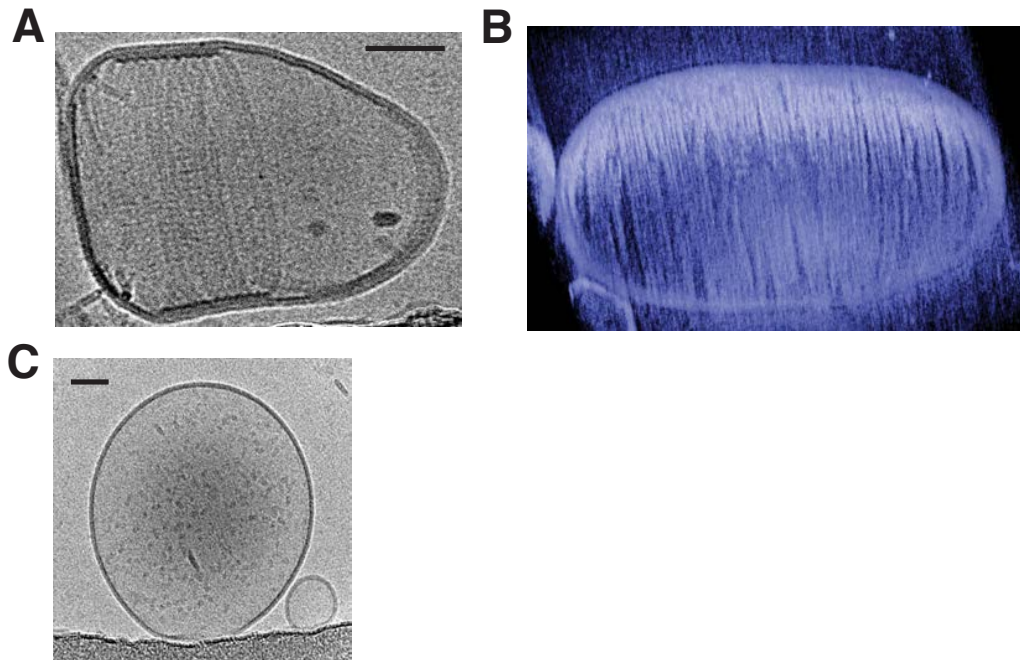

924 **(A)** The arrangement of MreB filaments inside the liposome is helical. Scale bar is 50 nm. **(B)** Many long  
925 *T. maritima* MreB filaments inside an artificial liposome, assembled *in vitro* and imaged by electron  
926 tomography. Almost the entire inner surface of the liposome is covered with filaments, leading to  
927 deformation of the normally spherical liposome. Corresponding movie: SM5, first part. Scale bar is 50 nm.  
928 **(C)** Control showing that liposomes are spherical in the absence of MreB. Scale bar is 50 nm.  
929  
930

931 **S5 – Growth of rod-shaped and spherical cells measured by doubling times, and**  
932 **rod shape recovery. Related to Figure 6.**

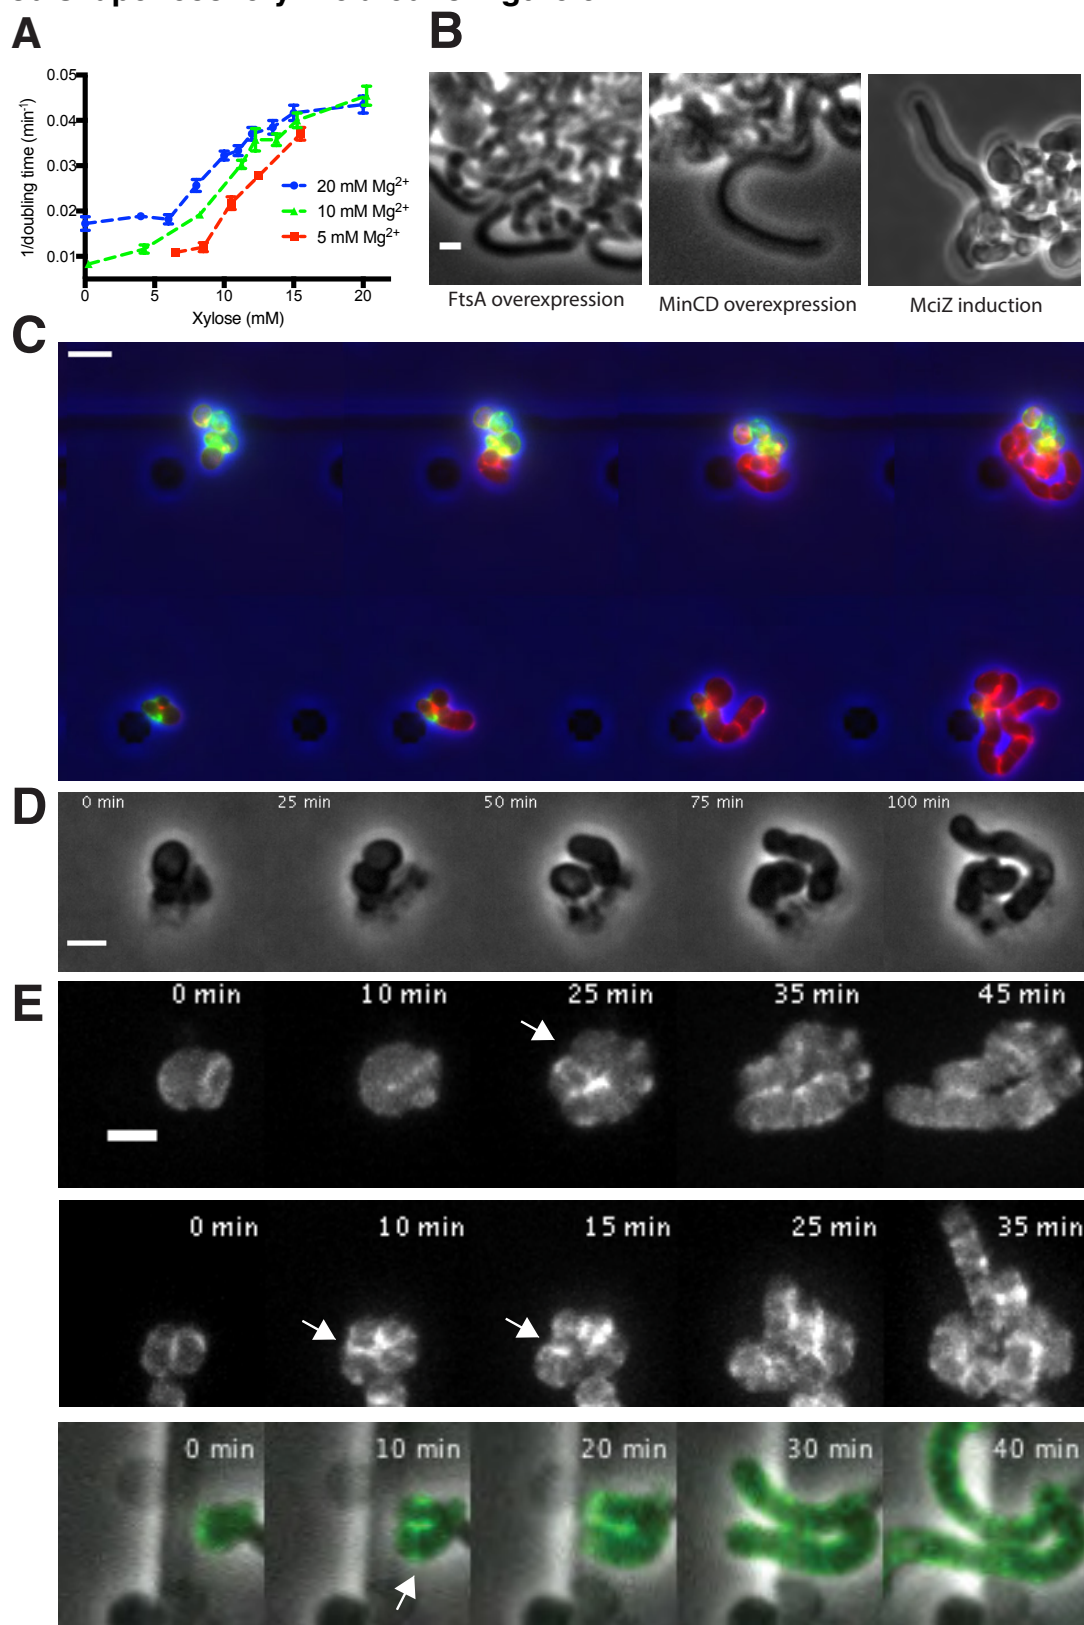

933

934 **A)** Rate of doubling ( $1/\text{doubling time}$ ), calculated from  $\text{OD}_{600}$ , increases with increasing levels of TagO as  
935 round cells become more rod-like. Increasing  $\text{Mg}^{2+}$  causes these curves to shift leftward, as  $\text{Mg}^{2+}$   
936 stabilizes rod shape in combination with WTAs (see Fig S1A). Error bars are SEM. **(B)** Rod shape  
937 recovery occurs in the absence of cell division and FtsZ filaments. Inhibition of FtsZ filaments was  
938 conducted by three means: FtsA overexpression (bAB388, grown with 1 mM IPTG and 60 mM xylose),  
939 MinCD overexpression (bAB327 grown with 1 mM IPTG and 60 mM xylose), and MciZ induction (bAB343  
940 grown in 1 mM IPTG and 30 mM xylose). In all cases, cells recovered rod shape. **(C)** Pulse chase  
941 labeling with FDAAs during TagO recoveries indicates that while emerging rods are composed of new cell  
942 wall, both spheres and rods incorporate new cell wall material. BCW82 was grown in a microfluidic  
943 chamber with 0 mM xylose, 20 mM  $\text{Mg}^{2+}$ , and 3  $\mu\text{M}$  HADA (green). Prior to imaging the medium was  
944 switched to 30 mM xylose (to induce TagO expression), 20 mM  $\text{Mg}^{2+}$  and 3  $\mu\text{M}$  cy3B-ADA (red, to  
945 visualize new cell wall incorporation). Cell outline (from phase) is shown in blue. Scale bar is 5  $\mu\text{m}$ ;  
946 frames 30 min apart. **(D)** A montage of a rod shape recovery occurring after a division that produced an  
947 ovoid, near rod-shaped cell that subsequently elongated as a rod. This example taken from an  
948 experiment with BRB785, where Pbp2a was first depleted (in a *pbpH* null) to make round cells, then  
949 Pbp2a was reinduced with 1 mM IPTG. See also bottom panel of S5E. **(E)** MreB localizes in a ring-like  
950 structure (white arrows) at the neck of emerging bulges, immediately prior to rod shape formation.  
951 BEG300, containing GFP-MreB was depleted of TagO by growing in bulk culture in media lacking xylose.  
952 Cells were then loaded into a cellASIC device, and grown for 2 hours in the same media with 1 mM IPTG  
953 added to induce GFP-MreB expression. At the start of imaging, the media was switched to 30 mM xylose  
954 to induce TagO expression, and Z-stacks of GFP MreB were taken using a spinning disk confocal every 5  
955 minutes. Shown is the maximal intensity projection of entire cell.  
956



957 **S6 - ConA staining of PY79  $\Delta$  tagE and muropeptide analysis of BEG300. Related**  
958 **to Figure 6B.**  
959

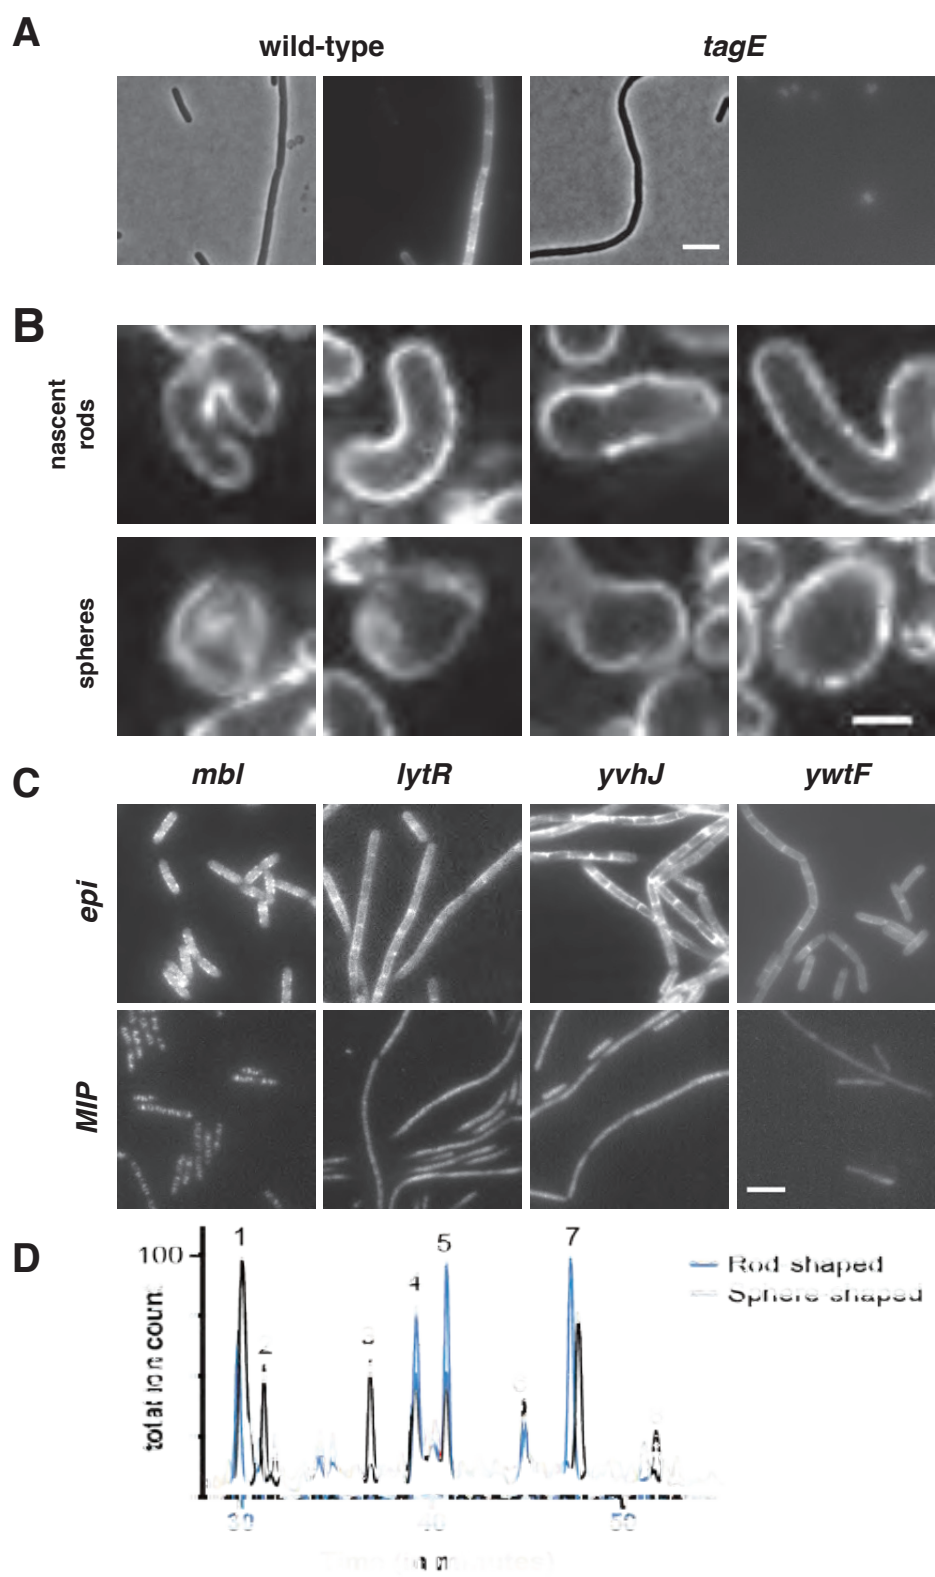

960 **(A)** Concanavalin A conjugated to Alexa Fluor 647 specifically stains wall teichoic acids and localizes  
961 uniformly around the entire cell during sphere to rod transitions. A comparison of PY79 and  $\Delta tagE$  cells  
962 stained with ConA-A647 reveals specificity of ConA for WTAs. The *tagE* gene is responsible for the  
963 glycosylation of wall-teichoic acids, rendering them susceptible to ConA binding. Scale bar is 5  $\mu$  m. **(B)**  
964 Fluorescence intensity of Alexa647-ConA, is comparable in rod shaped and round cells during sphere to  
965 rod recoveries. Furthermore, the WTA incorporation is diffuse, and not banded or localized. BEG300  
966 was grown in bulk culture and rod shape was induced by increasing TagO levels (0 to 30 mM xylose).  
967 Scale bar is 2.5  $\mu$  m. **(C)** Wall teichoic acid ligases diffuse homogenously across the cell surface. Ligases  
968 were tagged at the native locus and promoter with msfGFP and imaged continuously with 100 ms  
969 exposures. Epifluorescent images were collected under oblique laser illumination and maximal intensity  
970 projections (MIPs) were created over 100 frames of TIRF illumination (see Movie S8). For comparison,  
971 msfGFP-tagged Mbl, which localizes in discrete patches, is shown. Scale bar is 5  $\mu$  m. **(D)** Overlaid  
972 LC/MS traces corresponding to reduced muropeptides isolated from the sacculi of rod-shaped and  
973 sphere-shaped *B. subtilis*. The total ion count was scaled to the highest peak for each trace, and  
974 muropeptides were identified under the total ion count. Peaks 1-3 correspond to uncrosslinked  
975 muropeptides; peaks 4-8 correspond to crosslinked muropeptides. Muropeptides identified included the  
976 following: a tripeptide (GlcNAc-MurNAc-L-Ala-D-Glu-m-DAP by its [M+1]=871.3 (Exact mass=870.3) were  
977 identified under peak 1; a dipeptide (GlcNAc-MurNAc-L-Ala-D-Glu) was identified under peak 2  
978 [M+1]=699.7 (Exact mass=698.7); a tetrapeptide (GlcNAc-MurNAc-L-Ala-D-Glu-m-DAP-D-ala by its  
979 [M+1]=941.2 (Exact mass=940.2) was identified under peak 3; crosslinked, dimeric muropeptides were  
980 identified in peaks 4-7 containing the tetrasaccharide (GlcNAc-MurNAc-L-Ala-D-Glu-m-DAP-D-ala-m-  
981 DAP-D-Glu-L-Ala\_MurNAc-GlcNAc) by [M+1]=1795.8 and [M+2]/2=898.4; (Exact masses=1794.8); and  
982 peak 8 corresponded to a crosslinked, trimeric muropeptide containing two tetrapeptides (GlcNAc-MurNAc-  
983 L-Ala-D-Glu-m-DAP-D-ala) and a tripeptide (GlcNAc-MurNAc-L-Ala-D-Glu-m-DAP); [M+3]/3= 906.9  
984 (Exact mass=2717.7). To calculate the amount of each species, peaks were integrated by their extracted  
985 ion chromatograms. Crosslinked species were calculated using previous literature quantification methods  
986 (Glauner et al., 1988). In the rod-shaped *B. subtilis*, 41% crosslinking was observed; in sphere-shaped  
987 *Bacillus subtilis*, only 11% crosslinking was observed.

988

## 989 **Materials and Methods**

990

991 **Overnight culture growth.** All *B. subtilis* strains were prepared for experimentation as  
992 follows: strains were streaked from -80°C freezer stocks onto lysogeny broth (LB) agar  
993 plates. Following >12 hours of growth at 37°C, single colonies were transferred to  
994 serially diluted overnight bulk liquid cultures in LB supplemented with 20 mM  
995 magnesium chloride, placed on a roller drum agitating at 60 rpm, and grown at 25°C.  
996 After >12 hours growth to  $OD_{600} < 0.6$ , these starter cultures were transferred to or  
997 inoculated into subsequent growth conditions. All strains with *tagO* under inducible  
998 control were grown overnight in the presence of 30 mM xylose unless otherwise noted.

999

1000 **Single cell and bulk doubling time measurements.** For the experiments in Fig. 6B  
1001 and Fig. S3C, BEG300 cells were inoculated in the indicated medium (LB with 20 mM  
1002  $MgCl_2$  unless otherwise stated) from logarithmic phase overnights; “rods” were grown  
1003 from a low dilution with 30 mM xylose, and “spheres” were grown with 0 mM xylose.

1004 For bulk culture doubling time measurements, doubling times were calculated  
1005 from the slope of a graph of time vs. dilution for a succession of serial dilutions of a  
1006 given strain. Time, the dependent variable, was taken as the time for a given dilution to  
1007 pass the OD cutoff of  $OD_{600} = 0.20$ .

1008 Single cell measurements were made in three ways.

1009 i) Spherical and rod-shaped cells were allowed to grow on agarose pads made  
1010 with LB supplemented with 20 mM  $MgCl_2$ . 30 mM xylose was added to

1011 agarose pads for rod-shaped cells. Cells were imaged every 2 minutes for 4  
1012 hours with phase contrast microscopy as described in the section below.

1013 ii) Spherical and rod-shaped cells were grown in the CellASIC B04A plate in LB  
1014 supplemented with 20 mM MgCl<sub>2</sub> for spherical cells and LB supplemented  
1015 with 20 mM MgCl<sub>2</sub> and 30 mM xylose for rod-shaped cells. The CellASIC unit  
1016 confined the cells in the Z dimension due to the fixed height of the ceiling.  
1017 Cells were imaged every 10 minutes for 2 hours using phase contrast  
1018 microscopy as described in the section below.

1019 iii) For cells growing in the mother machine microfluidic device (see below), the  
1020 expansion of the cell length along the channel was quantified using FIJI  
1021 (Schindelin et al., 2012; Schneider et al., 2012); only the cells closest to the  
1022 mouth of the channel were counted. Since cells were always oriented along  
1023 the length of the channel (see Fig. 3A, S3A), changes in expansion in this  
1024 dimension accounted for all growth.

1025  
1026 **Imaging – phase contrast microscopy.** Phase contrast images were collected on a  
1027 Nikon (Tokyo, Japan) Ti microscope equipped with a 6.5 μm-pixel Hamamatsu  
1028 (Hamamatsu City, Japan) CMOS camera and a Nikon 100X NA 1.45 objective. Cells  
1029 were collected by centrifugation at 6,000 x *g* for 2 min and re-suspended in the original  
1030 growth medium. Unless otherwise specified, cells were then placed on No. 1.5 cover  
1031 glass, 24 x 60 mm, under a 1 mm thick agar pad (2-3% agar) containing LB

1032 supplemented with 20 mM magnesium chloride. Unless otherwise noted, all cells were  
1033 imaged at 37°C on a heated stage.

1034

1035 **Imaging – MreB particle tracking.** Images were collected on a Nikon TI microscope  
1036 with a 6.5  $\mu$ m-pixel CMOS camera and a Nikon 100X NA 1.45 objective. Cells of strain  
1037 BEG300 were grown overnight in LB supplemented with 30 mM xylose, 20 mM  
1038 magnesium chloride, 1  $\mu$ g/mL erythromycin, and 25  $\mu$ g/mL lincomycin at 25°C at the  
1039 specified xylose concentrations. 11  $\mu$ M isopropyl  $\beta$ -D-1-thiogalactopyranoside (IPTG)  
1040 was added to induce GFP-MreB and the cells were shifted to 37°C and allowed to grow  
1041 for 2 hours before imaging. Cells of strain BEG202 ( $\Delta$  *tagO*) with GFP-Mbl under a  
1042 xylose-inducible promoter were grown overnight at 25°C in LB supplemented with 20  
1043 mM magnesium chloride and 0.125 mM xylose, and shifted to 37°C for 2 hours before  
1044 imaging. Cells were placed on cleaned glass coverslips thickness No. 1.5, as described  
1045 in the next section. 3-6% agar pads were prepared in LB supplemented with 20 mM  
1046 magnesium chloride, 11  $\mu$ M IPTG and the desired concentration of xylose. Images  
1047 were collected for 3 min at 1 or 2 s intervals, as specified.

1048

1049 **Imaging – slide preparation.** Coverslips were sonicated in 1 M KOH for 15 min,  
1050 followed by 5 washes with water. Coverslips were washed twice with 100% ethanol, and  
1051 then sonicated in 100% ethanol, followed by one more wash in 100% ethanol. They  
1052 were stored in ethanol and dried for 10 min before use.

1053

1054 **Imaging – spinning disk confocal.** Images were collected on a Nikon TI microscope  
1055 with a Hamamatsu ImagEM (EM-CCD) camera (effective pixel size 160 nm) and Nikon  
1056 100X NA 1.45 TIRF objective. Z stacks were obtained at 0.2  $\mu$  m slices. Total image  
1057 depth was 3  $\mu$  m. Only the top 3 slices of the cell were used in maximum intensity  
1058 projections in Figure 3D.

1059

1060 **Image processing.** All image processing unless otherwise specified was performed in  
1061 FIJI (Schindelin et al., 2012; Schneider et al., 2012). Images used for particle tracking  
1062 were unaltered, except for trimming five pixels from the edges of some videos to  
1063 remove edge artifacts detected by the tracking software. Phase contrast images and  
1064 fluorescent images of protoplasts were adjusted for contrast. Phase contrast images  
1065 presented in the manuscript collected from cells in the custom microfluidic device, which  
1066 did not undergo quantitative processing, were gamma-adjusted ( $\gamma=1.5$ ) to compensate  
1067 for changes in brightness occurring at the device's feature borders; such processing  
1068 was not used for growth quantification. The images for Supplementary Movie 2 were  
1069 background-subtracted for viewing purposes; unaltered images were used for  
1070 quantitative processing in all cases.

1071

1072 **Microfluidics.** The custom microfluidic setup used to confine cells in Figure 3A-C,  
1073 Supplementary Figure 3A, and Supplementary Movie 3 was previously described in  
1074 (Norman et al., 2013). Briefly, a polydimethylsiloxane slab with surface features was  
1075 bonded to a 22 x 60 mm glass coverslip by oxygen plasma treatment followed by

1076 heating to 65°C for >1 hr. The features in our setup differed from those described in  
1077 (Norman et al., 2013), particularly in the omission of a second, wider layer in the cell  
1078 chambers, which enhanced growth at timescales beyond that of our experiments.  
1079 Syringes containing growth medium were connected to the microfluidic features using  
1080 Tygon tubing stainless steel dispensing needles (McMaster Carr Supply Company,  
1081 Elmhurst, Illinois). Medium was supplied to cells at a constant rate of 2-5  $\mu$  L/min using  
1082 automatic syringe pumps. Imaging was carried out using phase contrast microscopy as  
1083 described above. For the microfluidics experiments in Figures 5 and 6 and  
1084 Supplementary Movie 6 (top), 7, and 8, the CellASIC platform from Merck Millipore  
1085 (Billerica, Massachusetts) was used with B04A plates.

1086

1087 **Cell confinement experiments.** The cell confinement experiment in Figure 3A-C was  
1088 conducted by first loading cells into the chamber: BEG300 cells were grown to  
1089 stationary phase ( $OD_{600}$  3.0 – 5.0) in LB supplemented with 20 mM magnesium  
1090 chloride, passed through a 5  $\mu$  m filter, and concentrated 100-fold before loading in the  
1091 custom-made microfluidic device. Both phase contrast and fluorescent imaging were  
1092 performed as described in the “Imaging” section above. For observing MreB movement,  
1093 MreB-GFP expression was induced with 50  $\mu$  M IPTG upon loading into the microfluidic  
1094 chamber, and cells were imaged every 2 s with a camera exposure time of 300 ms.

1095

1096 **MreB alignment within protoplasts.** Cells of strains bJS18 (GFP-Mbl) and bEG300  
1097 (GFP-MreB) were grown overnight at 25°C in the osmoprotective SMM media (LB

1098 supplemented with 20 mM magnesium chloride, 17 mM maleic acid, 500 mM sucrose,  
1099 brought to a pH of 7.0) with maximum xylose induction (30 mM); cells were shifted to  
1100 37°C in the morning. For strain bEG300, the SMM media was supplemented with 8mM  
1101 xylose (for intermediate TagO induction). Following 2 hours of growth, 10 mg/mL of  
1102 freshly suspended lysozyme was added to the cultures with OD<sub>600</sub> > 0.2. After growing  
1103 for 1-2 hours in lysozyme, the cells were spun and concentrated. 6% agar pads made in  
1104 LB-SMM were made using a polydimethylsiloxane (PDMS) mold with crosses (2, 4 and  
1105 5  $\mu$  m arms and 5  $\mu$  m center). The cells were placed on the agar pad for 2 min,  
1106 allowing the cells to settle in the crosses. The pad was then placed in a MatTek  
1107 (Ashland, Massachusetts) dish for imaging. To check for the presence of cell walls in  
1108 protoplasts, wheat germ agglutinin conjugated to Alexa-555 was used. 20  $\mu$  L of 1  
1109 mg/mL stock was added to 1 mL of cells 20 min before the start of imaging. Some  
1110 cultures, after inoculation in the MatTek dish, were incubated at 37°C for 30 min to allow  
1111 cell growth.

1112

1113 **Depletions in liquid culture.** TagO depletions in Figure 2A were conducted using  
1114 strain BEG300 in liquid culture. Cells were prepared as overnights, as described above,  
1115 then grown at the specified xylose concentration at 37°C in LB with 20 mM magnesium  
1116 chloride for 4 hrs. The cells were then imaged as described above in the “Imaging –  
1117 MreB particle tracking” section.

1118

1119 Pbp2A depletions shown in Figure 2C were conducted in liquid culture using strain



1120 BRB785 with an IPTG - inducible Pbp2A fusion at the native locus with the redundant  
1121 transpeptidase PbpH deleted. This strain was grown overnight in the presence of 2 mM  
1122 IPTG, and then inoculated into CH media containing 2 mM IPTG, 0.015% xylose, and  
1123 20 mM magnesium chloride to stabilize the cells against lysis. At an OD<sub>600</sub> of 0.6, cells  
1124 were spun down in a tabletop centrifuge and washed 3 times in CH media lacking IPTG.  
1125 Cells were placed under agar pads containing 20 mM magnesium chloride, and  
1126 spinning disk confocal images were taken every 5 s on a Nikon Ti microscope with a  
1127 100X 1.49 TIRF objective and a Hamamatsu ImagEM C9100-13 EM-CCD camera  
1128 (effective pixel size of 160 nm).

1129

1130 **Depletions under solid state medium.** Depletions shown in Figure 5A were conducted  
1131 using strain BEG300. Cells were prepared as overnights in LB with 1 mM magnesium  
1132 chloride and 12 mM xylose. In the morning, they were washed in LB with 12 mM xylose  
1133 and no magnesium and placed under a 3% agar pad with the same medium. Phase  
1134 contrast images were collected every 5 min using a Photometrics (Tucson, Arizona)  
1135 CoolSNAP HQ2 CCD camera.

1136

1137 **Repletions.** Repletions of TagO or Pbp2a on pads, as shown in Figure 5B and  
1138 Supplementary Movie 6 (bottom), were performed with strains BEG300 and BRB785  
1139 respectively. Cells were grown as overnights, as described above, then depleted at  
1140 37°C for >4 hours in LB with 20 mM magnesium chloride and collected by centrifugation  
1141 at 6,000 x g for 2 min. The cells were re-suspended in LB supplemented with 20 mM  
1142 magnesium chloride and 1 mM IPTG (BRB785) and 30 mM xylose (BEG300), placed

1143 under 5% agarose pads on coverslips with thickness No. 1.5 for imaging. Phase  
1144 contrast images were collected every 5 min using a Photometrics CoolSNAP HQ2 CCD  
1145 camera.

1146 For the repletions shown in Figures 5B-C, 6A, Supplementary Figure 5C, and  
1147 Supplementary Movie 6 (top) and 7, performed in the CellASIC microfluidic device in a  
1148 B04A plate, BCW82 and BEG300 cells were grown to  $OD_{600}$  1.2 – 1.5 in LB  
1149 supplemented with 20 mM magnesium chloride, centrifuged to pellet large clumps for 3  
1150 min at  $< 500 \times g$ , and the supernatant loaded into the plate. Growth medium was  
1151 supplied at 5-6 PSI. Cells were grown for at least an additional 30 min before the  
1152 addition of inducer to the growth medium. Phase contrast images were collected every  
1153 10 min. Fluorescent images were collected on the imaging setup described in the  
1154 “Imaging – MreB Particle Tracking” section above: GFP-MreB was induced upon  
1155 loading into the microfluidic chamber with 1 mM IPTG, and MreB dynamics were  
1156 observed for 3 min after every 10 min, using 300 ms camera exposures taken every 2 s.

1157 For the repletions shown in Figure 6C and S5E, the same procedure was used,  
1158 but with imaging performed on the spinning disk confocal microscope described in  
1159 “Imaging – Spinning Disk Confocal”. Z-stacks were collected with a range of 3  $\mu\text{m}$   
1160 around the focal plane and 0.2  $\mu\text{m}$  steps. The MreB localization experiments were done  
1161 using strain bEG300 with full induction of GFP-MreB (1mM IPTG) and recovering cells  
1162 were imaged using the spinning disk microscope, collecting Z-stacks as described  
1163 before.

1164           Where indicated, instead of visualizing MreB dynamics, fluorescent D-amino  
1165 acids (Kuru et al., 2012) (7  $\mu$ M) were added to the growth medium in the CellASIC  
1166 device: HADA during depletions of TagO (0 mM xylose) and Cy3B-ADA during repletion  
1167 of TagO (30 mM xylose). Cells were washed with LB supplemented with 20 mM  
1168 magnesium chloride containing no D-amino acids for 1-2 min before imaging.

1169   To test if rod shape recovery occurs in the absence of cell division, 3 strains were tested  
1170 (BAB327, BAB343 and BAB388). Cells of BAB327 and BAB388 were grown in CH  
1171 media with 25 mM magnesium chloride in the absence of xylose at 37°C until OD<sub>600</sub>  
1172 ~0.5 and diluted 10-fold in fresh media. After 2 hours of growth, IPTG was added to a  
1173 final concentration of 1 mM (MinCD and FtsA, respectively) and cells were incubated for  
1174 an extra 1 hour. Cells were imaged on a spinning disk confocal under pads with 1 mM  
1175 IPTG and 60 mM xylose (for TagO repletion). Phase-contrast and fluorescent images  
1176 were acquired at 10 minute intervals for a total of 8 hours. Cells of BAB343 were grown  
1177 in LB supplemented with 20 mM, magnesium chloride in the absence of xylose at 25°C  
1178 overnight. The next day, after 2 hours of growth in the same media at 37°C, IPTG was  
1179 added to a final concentration of 1 mM (MciZ) and cells were incubated for an extra 1  
1180 hour. Cells were imaged on a spinning disk confocal under pads with 1 mM IPTG and  
1181 30 mM xylose (for TagO repletion). Phase-contrast and fluorescent images were  
1182 acquired at 10 minute intervals for a total of 4 hours.

1183

1184   **Depletion and repletion of Magnesium in the CellASIC.** For Supplementary Movie 8,  
1185 cells of BCW51 were grown overnight at 25° C in LB supplemented with 8mM xylose,

1186 20 mM magnesium chloride, 1  $\mu$  g/ml erythromycin and 25  $\mu$  g/ml lincomycin (MLS).  
1187 Cells were shifted to 37°C for 2 hours and loaded into the CellASIC B04A plate at OD<sub>600</sub>  
1188 ~0.6. At the start of imaging, magnesium was depleted by flowing in LB supplemented  
1189 only with 8 mM xylose and MLS at 3 psi. Images were collected every 20 min over a 4  
1190 hr period. Magnesium was resupplied to the cells by changing to LB supplemented with  
1191 8 mM xylose, 20 mM magnesium chloride, and MLS. Imaging was continued every 20  
1192 min for an additional 4 hrs.

1193

1194 **Measurements of cell shape at steady state growth.** Cells were grown overnight at  
1195 25°C in LB supplemented with 30 mM xylose, 20 mM magnesium chloride, 1  $\mu$  g/mL  
1196 erythromycin and 25  $\mu$  g/mL lincomycin. In the morning they were collected at OD<sub>600</sub>  
1197 ~0.2, spun in a tabletop centrifuge at 9000 rpm for 3 min and washed in LB  
1198 supplemented with various xylose (0-30 mM) and magnesium chloride (0-20 mM)  
1199 levels. 25-fold serial dilutions into LB supplemented with the same xylose and  
1200 magnesium chloride concentrations were made and allowed to grow at 37°C for 4 hrs.  
1201 Cells at OD<sub>600</sub> ~0.2 were concentrated by spinning in a tabletop centrifuge at 9000 rpm  
1202 for 3 min. They were placed on a coverslip thickness No. 1.5 under 3% agarose pads  
1203 made in LB supplemented with the same concentrations of xylose and magnesium  
1204 chloride. Images were collected using the imaging setup described in the “Imaging –  
1205 phase contrast microscopy” section above, as well as with a Photometrics CoolSNAP  
1206 HQ2 CCD camera. The magnification and pixel size were the same in both setups.

1207

## 1208 **Muropeptide analysis**

1209 To prepare muropeptides from strain BEG300, a similar protocol was performed as  
1210 reported previously (Atrih et al., 1999; Kühner et al., 2014). An overnight culture of  
1211 BEG300 (2 mL) was centrifuged at 10,000 rpm for 5 min. The cell pellet was  
1212 subsequently resuspended in 1 ml 0.25% SDS in 0.1 M Tris/HCl (pH 6.8). The mixture  
1213 was boiled at 100 °C for 20 minutes. After cooling, the suspension was centrifuged at  
1214 16,000 rpm for 10 minutes, and the pellet was washed with 1.5 ml H<sub>2</sub>O and centrifuged  
1215 again at 16,000 rpm for 10 minutes. The pellet was then washed two more times with  
1216 water. The pellet was then resuspended in 1 ml H<sub>2</sub>O and sonicated for 30 minutes. 500  
1217 μl of a solution containing DNase (15 μg/ml) and RNase (60 μg/ml) in 0.1 M Tris/HCl  
1218 (pH 6.8) was added. After shaking at 37 °C for 2 hours, the enzymes were inactivated  
1219 at 100 °C for 5 minutes. The mixture was pelleted at 16,000 rpm and washed with 1 ml  
1220 H<sub>2</sub>O twice. Wall teichoic acid was removed from the pellet by resuspending the pellet in  
1221 500 μl of 1 M HCl and incubating the mixture at 37 °C for 4 hours. The pellet was then  
1222 centrifuged and washed with water at least four times to neutralize the pH to  
1223 approximately pH 6. Subsequently, the pellet was resuspended in 100 μl of digestion  
1224 buffer (12.5 mM NaH<sub>2</sub>PO<sub>4</sub>) with 10 μl of mutanolysin (5 U/mL in H<sub>2</sub>O, from  
1225 *Streptomyces globisporus*, purchased from Sigma Aldrich, St. Louis, Missouri).  
1226 Peptidoglycan was digested overnight, shaking at 37 °C. Subsequently, the sample was  
1227 centrifuged at 16,000 rpm for 10 minutes and muropeptides were reduced by adding 50  
1228 μl of sodium borohydride (10 mg/ml, H<sub>2</sub>O) was added. The mixture was incubated for  
1229 30 minutes. To quench the muropeptide reduction, 1.4 μl of 20% phosphoric acid was

1230 added to adjust the pH to 4. The mixture was then used for LC/MS analysis. High-  
1231 performance liquid chromatography (HPLC) was carried out on an Agilent Technologies  
1232 (Santa Clara, California) 1260 Quaternary LC system using a SymmetryShield RP18 5  
1233  $\mu\text{M}$ , 4.6 x 250 mm column (Waters, Part No. 186000112). Solvent A was 0.1% formic  
1234 acid in water; Solvent B was 0.1% formic acid in acetonitrile. At a flow rate of 0.5  
1235 mL/min, Solvent B was increased from 0-20% in 100 minutes, held at 20% for 20  
1236 minutes, increased to 80% by 130 minutes, held at 80% for 10 minutes, and  
1237 subsequently reduced to 0% and held at 0% for 10 minutes. To analyze the  
1238 muropeptide composition, muropeptides were identified by the masses observed under  
1239 specific peaks in the total ion chromatograms. Similar muropeptides were observed as  
1240 previously reported for other *Bacillus subtilis* strains (Kühner et al., 2014). To quantify  
1241 the amount of muropeptides observed, exact masses were integrated using extracted  
1242 ion chromatograms (EICs). Subsequently, we calculated the percentage crosslinking as  
1243 previously reported (Glauner et al., 1988). Technical and biological replicates were  
1244 performed for each strain background.

1245

1246 **Particle tracking.** The MATLAB based software uTrack was used for particle tracking  
1247 (Jaqaman et al., 2008). We used the comet detection algorithm to detect filaments  
1248 (difference of Gaussian: 1 pixel low-pass to 4-6 pixels high pass, watershed  
1249 segmentation parameters: minimum threshold 3-5 standard deviations with a step size  
1250 of 1 pixel) which, at our MreB induction levels gave better localization of the resultant  
1251 asymmetric particles over algorithms that search for symmetric Gaussians. Visual

1252 inspection of detected particles confirmed that most of the particles and none of the  
1253 noise were being detected. A minimum Brownian search radius of 0.1-0.2 pixels and a  
1254 maximum of 1-2 pixels was applied to link particles with at least 5 successive frames.  
1255 Directed motion propagation was applied, with no joins between gaps allowed. Tracks  
1256 were visualized using the FIJI plug-in TrackMate (Tinevez et al., 2017). For sphere to  
1257 rod transitions and cells confined in microfluidic channels, movies were processed by  
1258 subtracting every 8<sup>th</sup> frame from each frame to remove stationary spots using the FIJI  
1259 plugin StackDifference before tracking. The tracking was done as described earlier in  
1260 this section.

1261

1262 **Fluorescent analysis of TagTUV.** Strains containing fluorescent fusions to TagT,  
1263 TagU, and TagV were grown as described in the “Overnight culture growth” section but  
1264 in CH medium instead of LB. Cells were grown for 3 hours at 37°C before imaging, then  
1265 collected by centrifugation at 6,000 x *g* for 2 min and re-suspended in CH. Cells were  
1266 then placed on a glass coverslip thickness No. 1.5 under an agar pad thickness 1 mm  
1267 made from CH and 1.5% agarose. Timelapse images were collected with TIRF  
1268 illumination, using continuous 100 ms 488 nm exposures. Epifluorescent illuminated  
1269 images were collected from a single exposure, while maximal intensity projections were  
1270 formed from a series of continuous 100 ms TIRF exposures.

1271

1272 **Teichoic acid labeling with Concanavalin A.** BEG300 cells were grown from  
1273 overnights as described in the “Fluorescent analysis of TagTUV” section at 37°C for 4

1274 hours without xylose to deplete WTAs, then induced with 30 mM xylose for 1.5 hours to  
1275 re-induce WTA expression. Cells were then moved to 25°C for at least 30 min and  
1276 incubated with 25 µg/mL Concanavalin A conjugated to Alexa Fluor 647. Cells were  
1277 collected by centrifugation at 6,000 x *g* for 2 min, washed with CH medium, then re-  
1278 suspended in fresh CH medium. Cells were then placed on a glass coverslip thickness  
1279 No. 1.5 under an agar pad thickness 1 mm made from CH medium and 1.5% agarose.  
1280 For PY79 and BCW61 controls, lectin-Alexa Fluor conjugate concentration was 200  
1281 µg/mL. For non-quantitative analysis, imaging was performed with the microscope  
1282 described in “Imaging – MreB Particle Tracking”; for quantitative analysis, imaging was  
1283 performed with the microscope described in “Imaging – Spinning Disk Confocal”.  
1284 Quantification was performed in FIJI; pixel values were corrected for mean fluorescent  
1285 background.

1286

1287 **Data analysis – selecting directional tracks.** The output of uTrack is the position  
1288 coordinates of tracks over frames. We fit a line through these coordinates using  
1289 orthogonal least squares regression to minimize the perpendicular distance of the points  
1290 from the line of best fit. We used principal component analysis for orthogonal regression  
1291 using custom written MATLAB code. The  $R^2$  values we obtain range from 0.5 to 1. We  
1292 calculated mean track positions, angles and displacement using the line of best fit for all  
1293 tracks. We also calculated the mean square displacement versus time of individual  
1294 tracks and fit these curves to the quadratic equation  $MSD(t) = 4Dt + (Vt)^2$ , using  
1295 nonlinear least squares fitting. As later times have fewer points and are noisier, we fit



1296 the first 80% of the data for each track. We determined  $\alpha$  by fitting a straight line to the  
1297  $\log(MSD(t))$  vs.  $\log(t)$  curve. The goodness of fit was evaluated by determining the  $R^2$   
1298 value. We selected tracks for linearity and directional motion, based on the following  
1299 cutoffs:  $R^2 > 0.9$ , displacement  $> 0.2 \mu\text{m}$ , velocity  $> 1e^{-9} \mu\text{m/s}$ , and  $R^2$  of the linear fit  
1300 of  $\log(MSD(t))$  vs.  $\log(t) > 0.6$ .

1301

1302 **Data analysis – cell segmentation.** The MATLAB-based software Morphometrics  
1303 (Ursell et al., 2017) was used to segment phase contrast images of cells. We used the  
1304 phase contrast setting for rod-shaped and intermediate states and the peripheral  
1305 fluorescence setting for spherical states, because in this latter condition, peripheral  
1306 fluorescence empirically did a better job of fitting cell outlines. The cell contours  
1307 obtained were visually inspected and any erroneous contours were removed by custom  
1308 written MATLAB code.

1309

1310 **Data analysis – track angles with respect to the long axis of the cell.** Track angles  
1311 were calculated with respect to the cell midline as defined by the Morphometrics  
1312 “Calculate Pill Mesh” feature, which identifies the midline based on a unique  
1313 discretization of the cell shape determined from its Voronoi diagram. The difference  
1314 between the track angle and midline angle was then calculated. Since the track angles  
1315  $\theta_t$  and midline angles  $\theta_m$  both ranged from  $-90^\circ$  to  $90^\circ$ , the range of angle differences  
1316  $\Delta\theta = \theta_t - \theta_m$  was  $-180^\circ$  to  $180^\circ$ . We changed the range to 0 to  $180^\circ$  by the  
1317 transformation:  $\Delta\theta = 180 + \Delta\theta$  if  $\Delta\theta < 0$ , and 0 to  $90^\circ$  by the transformation:  $\Delta\theta =$

1318  $180 - \Delta\theta$  if  $\Delta\theta > 90$ . The standard deviations (SD) reported are measured from the  
1319 distributions with a range of 0-180° as this SD most accurately depicts deviations from  
1320 90°.

1321 **Data analysis – mean dot product of tracks.** Custom written MATLAB code was used  
1322 to calculate the normalized dot product ( $DP$ ) of track pairs along with the distance ( $d$ )  
1323 between their mean positions  $\bar{x}$  and  $\bar{y}$  as follows:

$$1324 \quad DP_{ij} = \cos(\theta_i - \theta_j), \quad d_{ij} = \sqrt{(\bar{x}_i - \bar{x}_j)^2 + (\bar{y}_i - \bar{y}_j)^2}$$

1325 To eliminate out-of-cell tracks we only considered those that had 3 other tracks within a  
1326  $5 \mu\text{m}$  radius of their mean position. The dot product of track pairs ( $DP$ ) and distance ( $d$ )  
1327 between them was stored in data files, along with all the previous information for each  
1328 individual track ( $R^2$ , velocities, angles, mean positions, displacement etc). The files were  
1329 then parsed using the cutoffs described in the “Data analysis – selecting directional  
1330 tracks” section. The tracks were binned based on the distance and the mean dot  
1331 product calculated for each distance range as follows:

$$1332 \quad \overline{DP} = \frac{1}{N} \sum_{i>j}^N \cos(\theta_i - \theta_j)$$

1333 A cutoff of  $3 \mu\text{m}$  was chosen as the maximum binning distance, which is the average  
1334 length of a cell.

1335

1336 **Data analysis – simulation of random angles.** A data file containing simulated tracks  
1337 was created by a custom written MATLAB script, which generates random angles  
1338 distributed randomly on a  $100 \times 100 \mu\text{m}$  area. Each track has  $R^2 = 0.95$ , velocity = 25  
1339 nm/s and displacement =  $1 \mu\text{m}$ . The same analysis code was run on these simulated

1340 tracks to generate track pairs with dot product and distance stored in a new data file.  
1341 The data file was parsed using the same cutoffs as the real data and the mean dot  
1342 product for each distance range calculated. The total numbers of trajectories within the  
1343 simulation were much higher than the actual data (2-10 times higher).

1344

1345 **Data analysis – cell width.** Pill meshes were created using Morphometrics (Ursell et  
1346 al., 2017), which calculates the coordinates of line segments perpendicular to the cell  
1347 long axis. For cell widths at various steady state TagO and Mg<sup>2+</sup> levels, the distance of  
1348 these line segments were calculated using a custom written MATLAB script and the  
1349 maximum width along the length of the cell was taken as the cell width. When  
1350 measuring cell width nearest to a track (for calculating track angle as a function of cell  
1351 width), the mean width of the 10 nearest contour points from the track was calculated  
1352 using a custom written MATLAB script. Cell widths of emerging bulges and rods from  
1353 round cells were measured manually in FIJI. Our ability to segment individual spherical  
1354 cells was limited by their nonuniform contrast, perhaps arising from the nonuniform  
1355 thickness of these cells in the Z dimension; consequently, Morphometrics-based width  
1356 measurements in these cells was limited, especially in cells exceeding 2  $\mu$  m in  
1357 diameter.

1358

1359 **Data analysis – cell curvature.**

1360 Sidewall curvature of cells was extracted from the pill mesh obtained from  
1361 Morphometrics. The curvature values are calculated from 3 successive contour points

1362 and smoothed over 2 pixels. The mean curvature of 3 nearest points to each track were  
1363 calculated from both sides of the cell contour and called the mean curvature. Principal  
1364 curvature ratio was calculated by dividing the sidewall curvature with the curvature in  
1365 the radial direction (calculated from cell width assuming the cell is radially symmetric).  
1366 For radial curvature we used the following expression, where  $r_{cell}$  is half the cell width:

1367 
$$\kappa_2 = \frac{1}{r_{cell}}$$

1368 A value close to 1 indicates the two principal curvatures are similar and the cells are  
1369 round.

1370

#### 1371 **Data analysis – time and curvature plots of rod shape recovery.**

1372 Phase contrast images were used to show rod shape emergence from local bulges.  
1373 Edges were enhanced in FIJI and contrast adjusted to give bright cell outlines in the  
1374 images. The stack was then colored in time using temporal color code function in FIJI.  
1375 To create the curvature plot, the phase contrast images were run through  
1376 Morphometrics which calculates the curvature at each contour point along the cell  
1377 outline. The contour points of interest were selected and plotted using a custom written  
1378 MATLAB script, which colored each point according to its local curvature as calculated  
1379 by Morphometrics. To provide a good resolution for positive curvatures, we rescaled the  
1380 color map such that negative curvatures were colored blue and positive curvatures were  
1381 scaled by their curvature value.

1382

#### 1383 **Data analysis – single cell doubling times**

1384 Data from agar pads experiments was analyzed using custom written MATLAB code.  
1385 Data from cellASIC experiments was analyzed in Morphometrics to get areas for each  
1386 cell. For doubling times during sphere to rod transitions, the data was collected by  
1387 manually measuring the areas of the sphere and rod regions of the same cell in FIJI. In  
1388 all cases, the area of each cell per frame was calculated and the log plot of area vs time  
1389 was fit to a line. The doubling time was calculated using the slope of this line.

1390

1391 **Data analysis – Tangential correlation of cell contours.**

1392

1393 Cell contours were used to calculate tangent angles using the equation:  $\theta_i =$   
1394  $\tan^{-1} \frac{y_{i+1}-y_i}{x_{i+1}-x_i}$ . The correlation between angles was calculated using the cosine of the  
1395 angle difference binned as a function of number of points (n) between the  
1396 angles:  $G(n) = \frac{1}{N} \sum_{i=1}^N \cos(\theta_{i+n} - \theta_i)$ . The number of points was converted to contour  
1397 length using the pixel size of the camera to get the final correlation function:  $G(l) =$   
1398  $\frac{1}{N} \sum_{i=1}^N \cos(\theta_{i+l} - \theta_i)$ .

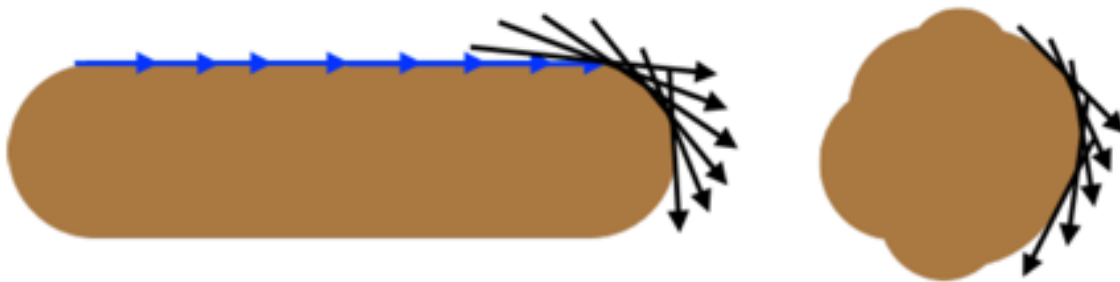

1399

1400 As shown above, for straight rods, the contour angles on average remain highly  
1401 correlated over larger distances, becoming uncorrelated at the cell pole. In spherical  
1402 cells, the angles become uncorrelated at shorter distances.

1403

#### 1404 ***T. maritima* MreB protein purification**

1405 Full length, un-tagged *Thermotoga maritima* MreB was purified as described previously  
1406 (Salje et al., 2011).

1407

#### 1408 ***In vitro* reconstitution of *T. maritima* MreB filaments inside liposomes**

1409 The protein was encapsulated inside unilamellar liposomes following a previously  
1410 published protocol (Szwedziak et al., 2014). For this, 50  $\mu$ L of *E. coli* total lipid extract,  
1411 dissolved in chloroform at 10 mg/mL, was dried in a glass vial under a stream of  
1412 nitrogen gas and left overnight under vacuum to remove traces of the solvent. The  
1413 resulting thin lipid film was hydrated with 50  $\mu$  L of TEN100 8.0 (50 mM Tris/HCl, 100  
1414 mM NaCl, 1 mM EDTA, 1 mM NaN<sub>3</sub>, pH 8.0), supplemented with 20 mM CHAPS  
1415 (Anatrace, Maumee, Ohio), and shaken vigorously at 800 rpm using a benchtop micro  
1416 centrifuge tube shaker for 2 hrs. The lipid-detergent solution was then sonicated for 1  
1417 min in a water bath sonicator. Subsequently, 50  $\mu$  L of MreB protein solution at 30  $\mu$  M,  
1418 supplemented with 0.5 mM magnesium ATP (Jena Bioscience, Germany) was added  
1419 and left for 30 min at room temperature. Next, the mixture was gradually diluted within  
1420 10-20 min to 600  $\mu$  L with TEN100 8.0 plus 0.5 mM magnesium ATP (without detergent)  
1421 to trigger spontaneous liposome formation. 2.5  $\mu$  L of the solution was mixed with 0.2  $\mu$

1422 L 10 nm IgG immunogold conjugate (TAAB, UK) and plunge-frozen onto Quantifoil R2/2  
1423 carbon grid, using a Vitrobot automated freeze plunger (FEI Company, Hillsboro,  
1424 Oregon  
1425 ) into liquid ethane.

1426

### 1427 **Electron cryomicroscopy and cryotomography**

1428 2D electron cryomicroscopy images were taken on an FEI Polara TEM (FEI Company)  
1429 operating at 300 kV with a 4k x 4k Falcon II direct electron detector (FEI Company) at a  
1430 pixel size of 1.8 Å. For electron cryotomography, samples were imaged using an FEI  
1431 Titan Krios TEM (FEI Company) operating at 300 kV, equipped with a Gatan imaging  
1432 filter set at zero-loss peak with a slit-width of 20 eV. A 4k x 4k post-GIF K2 Summit  
1433 direct electron detector (Gatan, a subsidiary of Roper Technologies, Lakewood Ranch,  
1434 Florida) was used for data acquisition with SerialEM software (Mastronarde, 2005) at a  
1435 pixel size of 3.8 Å at the specimen level. Specimens were tilted from -60° to +60° with  
1436 uniform 1° increments. The defocus was set to between 8 and 10  $\mu$ m, and the total  
1437 dose for each tilt series was around 120-150 e/Å<sup>2</sup>.

1438

### 1439 **Image processing**

1440 Tomographic reconstructions from tilt series were calculated using RAPTOR (Amat et  
1441 al., 2008) and the IMOD tomography reconstruction package followed by SIRT  
1442 reconstruction with the TOMO3D package (Agulleiro and Fernandez, 2011; Kremer et

1443 al., 1996). Movies showing liposomes were prepared with Chimera and PyMOL

1444 (DeLano, 2002; Pettersen et al., 2004).

1445

1446

1447



## 1448 Strain construction

1449

1450 **BCW51** [*ycgO::Pxyl-tagO*, *tagO::erm*, *amyE::sfGFP-mreB*, *sinR::phleo*] was generated  
1451 by transforming BEG300 with a Gibson assembly consisting of three fragments: 1) PCR  
1452 with primers Sinr\_up\_F and Sinr\_up\_R and template PY79 genomic DNA; 2) PCR with  
1453 primers oJM028 and oJM029 and template plasmid pWX478a (containing *phleo*); 3)  
1454 PCR with primers Sinr\_DOWN\_R and Sinr\_DOWN\_F and template genomic DNA.

1455

1456 **BCW61** [*tagE::erm*] was generated by transforming PY79 with a Gibson assembly  
1457 consisting of three fragments: 1) PCR with primers oCW054 and oCW055 and template  
1458 PY79 genomic DNA; 2) PCR with primers oJM028 and oCW057 and template plasmid  
1459 pWX467a containing *cat*; 3) PCR with primers oCW058 and oCW059 and template  
1460 PY79 genomic DNA.

1461

1462 **BCW72** [*yvhJΩPxylA-mazF (cat)*] was generated by transforming PY79 with a Gibson  
1463 assembly consisting of three fragments: 1) PCR with primers oCW139 and oCW141  
1464 and template PY79 genomic DNA; 2) PCR with primers oJM029 and oMK047 and  
1465 template DNA consisting of a fusion of *cat* and the *mazF* counterselectable marker from  
1466 pGDREF (Yu et al., 2010); 3) PCR with primers oCW142 and oCW143 and template  
1467 PY79 genomic DNA.

1468

1469 **BCW77** [*ywtFΩPxylA-mazF (cat)*] was generated by transforming PY79 with a Gibson  
1470 assembly consisting of three fragments: 1) PCR with primers oCW159 and oCW161  
1471 and template PY79 genomic DNA; 2) PCR with primers oJM029 and oMK047 and  
1472 template DNA consisting of a fusion of *cat* and the *mazF* counterselectable marker from  
1473 pGDREF (Yu et al., 2010); 3) PCR with primers oCW164 and oCW165 and template  
1474 PY79 genomic DNA.

1475

1476 **BCW78** [*ywtFΩmsfGFP-ywtF*] was generated by transforming BCW77 with a Gibson  
1477 assembly consisting of three fragments: 1) PCR with primers oCW160 and oCW161  
1478 and template PY79 genomic DNA; 2) PCR with primers oCW072 and oCW073 and  
1479 BMD61 genomic DNA; 3) PCR with primers oCW163 and oCW165 and template PY79  
1480 genomic DNA.

1481

1482 **BCW79** [*yvhJΩmsfGFP-yvhJ*] was generated by transforming BCW72 with a Gibson  
1483 assembly consisting of three fragments: 1) PCR with primers oCW139 and oCW146  
1484 and template PY79 genomic DNA; 2) PCR with primers oCW072 and oCW073 and  
1485 BMD61 genomic DNA; 3) PCR with primers oCW143 and oCW145 and template PY79  
1486 genomic DNA.

1487

1488 **BCW80** [*lytRΩPxylA-mazF (cat)*] was generated by transforming PY79 with a Gibson  
1489 assembly consisting of three fragments: 1) PCR with primers oCW101 and oCW109  
1490 and template PY79 genomic DNA; 2) PCR with primers oJM029 and oMK047 and  
1491 template DNA consisting of a fusion of *cat* and the *mazF* counterselectable marker from

1492 pGDREF (Yu et al., 2010); 3) PCR with primers oCW100 and oCW125 and template  
1493 PY79 genomic DNA.

1494

1495 **BCW81** [*lytR*Ω*msfGFP-lytR*] was generated by transforming BCW72 with a Gibson  
1496 assembly consisting of three fragments: 1) PCR with primers oCW101 and oCW137  
1497 and template PY79 genomic DNA; 2) PCR with primers oCW072 and oCW073 and  
1498 BMD61 genomic DNA; 3) PCR with primers oCW100 and oCW138 and template PY79  
1499 genomic DNA.

1500

1501 **BCW82** [*tagO::erm*, *ycgO::PxylA-tagO*, *amyE::Pspac-gfp-mreB (spec)*, *dacA::kan*] was  
1502 generated by transforming BEG300 with genomic DNA from BGL19.

1503

1504 **BEG202** [*tagO::erm amyE::PxylA-gfp-mbl (spec)*] was generated by transforming  
1505 BEB1451 with genomic DNA from BJS18.

1506

1507 **BEG281** [*ycgO::PxylA-tagO*] was generated by transforming with a plasmid created via  
1508 ligating a Gibson assembly into pKM077. pKM77 was digested with EcoRI and XhoI.  
1509 The assembly was created with two fragments: 1) PCR with primers oEG85 and oEG86  
1510 and template py79 genomic DNA; 2) PCR with primers oEG87 and oEG88.

1511

1512 **BEG291** [*tagO::erm*, *ycgO::PxylA-tagO*] was generated by transforming BEG281 with  
1513 genomic DNA from BRB4282.

1514

1515 **BEG300** [*tagO::erm*, *ycgO::PxylA-tagO*, *amyE::Pspac-gfp-mreB (spec)*] was generated  
1516 by transforming BEG291 with genomic DNA from BEG275.

1517

1518 **BMD61** [*mbl*Ω*mbl-msfGFP (spec)*] was generated by transforming py79 with a Gibson  
1519 assembly consisting of four fragments: 1) PCR with primers oMD44 and oMD90 and  
1520 template PY79 genomic DNA; 2) PCR with primers oMD47 and oMD56 and template  
1521 synthetic, codon-optimized *msfGFP*; 3) PCR with primers oJM028 and oJM029 and  
1522 template plasmid pWX466a (containing *spec*); 4) PCR with primers oMD48 and oMD50  
1523 and template genomic DNA.

1524

1525 **bSW99** [*amyE::spc-Pspac-mciZ*] was generated by transforming PY79 with a Gibson  
1526 assembly consisting of five fragments: 1) PCR with primers oMD191 and oMD108 and  
1527 template PY79 genomic DNA (containing upstream region of *amyE*); 2) PCR with  
1528 primers oJM29 and oJM28 and template plasmid pWX466a (containing *spec*); 3) PCR  
1529 with primers oMD234 and oSW76 and template plasmid pBOSE1400 (a gift from Dr.  
1530 Briana Burton, containing *spec*); 4) PCR with primers oAB307 and oAB291 and  
1531 template PY79 genomic DNA (containing *mciZ*); 5) PCR with primers oMD196 and  
1532 oMD197 and template PY79 genomic DNA (containing downstream region of *amyE*).

1533

1534 **bAB343** [*tagO::erm*, *ycgO::cat-PxylA-tagO*, *amyE::spc-Pspac-mciZ*, *ftsAZ::ftsA-*  
1535 *mNeonGreen-ftsZ*] was generated by transforming bAB185 (Bisson-Filho et. al, 2017)

1536 with genomic DNA from bSW99. *The resultant strain was then transformed with the*  
1537 *genomic DNA from BEG291 and selected for Cm resistance. Subsequently, the*  
1538 *resultant strain was transformed again with genomic DNA from BEG291, but colonies*  
1539 *were selected for MLS resistance in the presence of 30 mM of xylose and 25 mM*  
1540 *MgCl<sub>2</sub>.*

1541  
1542 **bAB327** [*tagO::erm, ycgO::cat-PxylA-tagO, amyE::spc-Physpank-minCD, ftsAZ::ftsA-*  
1543 *mNeonGreen-ftsZ*] was generated by transforming bAB185 (Bisson-Filho et al., 2017)  
1544 with genomic DNA from JB60 (a gift from Dr. Frederico Gueiros-Filho). *The resultant*  
1545 *strain was then transformed with the genomic DNA from BEG291 and selected for Cm*  
1546 *resistance. Subsequently, the resultant strain was transformed again with genomic DNA*  
1547 *from BEG291, but colonies were selected for MLS resistance in the presence of 60 mM*  
1548 *xylose and 25 mM MgCl<sub>2</sub>.*

1549  
1550 **bAB388** [*tagO::erm, ycgO::cat-PxylA-tagO, amyE::spc-Physpank-ftsA, ftsAZ::ftsA-*  
1551 *mNeonGreen-ftsZ*] was generated by transforming bAB199 (Bisson-Filho et al., 2017)  
1552 with genomic DNA from BEG291 and selected for Cm resistance. *Subsequently, the*  
1553 *resultant strain was transformed again with genomic DNA from BEG291, but colonies*  
1554 *were selected for MLS resistance in the presence of 60 mM xylose and 25 mM MgCl<sub>2</sub>.*

1555  
1556  
1557

## 1558 **Supplemental Text 1 - MreB Modeling**

1559

### 1560 **Modeling predicts preferred MreB orientation and a typical cell width for losing** 1561 **binding orientation**

1562

1563 Here we show that energetic modeling of an MreB filament directly binding to the inner  
1564 membrane predicts the existence of both a preferred orientation of binding and a typical  
1565 cell width for losing binding orientation. MreB monomers assemble into higher-order  
1566 oligomers and bind directly to the inner membrane. When an MreB filament binds to the  
1567 inner membrane, the combined MreB-membrane system requires an energy of  
1568 deformation  $E_{def}(l_b)$  for the membrane to deviate from an equilibrium position and gains  
1569 an energy of interaction  $E_{int}(l_b)$  from the hydrophobic binding. Both the deformation and  
1570 interaction energies are expressed as functions of the bound MreB length,  $l_b$ . Note that  
1571 the rigid cell wall imposes a boundary constraint on the cell membrane and that the  
1572 equilibrium membrane configuration arises from a balance of membrane bending, turgor  
1573 pressure, and cell wall confinement. If the MreB filament were to bind, the change in the  
1574 total energy  $E$  of the membrane-MreB system is:

1575

$$1576 \quad \Delta E = E_{def} - E_{int}. \quad (1)$$

1577

1578 The binding configuration that minimizes  $\Delta E$  corresponds to the one that is observed  
1579 physically. We therefore wish to minimize  $\Delta E$ .

1580

## 1581 **Estimate of the hydrophobic interaction energy $E_{int}$**

1582

1583 We assume that the biochemistry of MreB is conserved in prokaryotes so that, like *C.*  
1584 *crescentus* and *E. coli* MreB (van den Ent et al., 2014), *B. subtilis* MreB is assembled  
1585 into antiparallel double protofilaments consisting of many monomeric units. Consider an  
1586 MreB filament containing  $N_{int}$  interaction sites with a membrane, each with some  
1587 independent and additive interaction energy  $E_{int}^0$ . Due to the antiparallel arrangement of  
1588 the protofilaments (Salje et al., 2011; van den Ent et al., 2014), there are two binding  
1589 sites per monomeric unit of MreB. We therefore estimate the number of binding sites  
1590 per MreB binding length  $l_b$  as:

1591

$$1592 \quad N_{int} = \frac{2l_b}{l_{\text{MreB}}}, \quad (2)$$

1593

1594 where  $l_{\text{MreB}} \approx 5.1$  nm is the length of a monomeric unit. The energy of burying the  
1595 amino acids relevant to the binding is approximately:

1596

$$1597 \quad E_{int}^0 \approx 6.04 \frac{\text{kcal}}{\text{mol}} = 10 kT, \quad (3)$$

1598

1599 where  $k$  denotes Boltzmann's constant and  $T$  denotes the ambient temperature; the  
1600 energies of burying individual amino acids were derived from water/octanol partitioning.  
1601 At a room temperature of  $T = 25^\circ$  C, the interaction energy per MreB binding length  $l_b$   
1602 is therefore:

1603

$$1604 \quad \varepsilon_{int} = 2 \times 10kT / l_{\text{MreB}} = 1.8 \times 10^{-11} \text{ J/m}, \quad (4)$$

1605

1606 and the hydrophobic interaction energy is:  $E_{int}(l_b) = \varepsilon_{int}l_b$ .

1607

## 1608 **Estimate of the membrane deformation energy**

1609

1610 The membrane deformation energy  $E_{def}(l_b)$  can be decomposed as:

1611

$$1612 \quad E_{def}(l_b) = E_{bend}^{\text{MreB}}(l_b) + E_{int}^{\text{membrane}}(l_b), \quad (5)$$

1613

1614 where  $E_{bend}^{\text{MreB}}$  denotes the bending energy of the MreB filament and  $E_{int}^{\text{membrane}}$  denotes  
1615 the indentation energy of the membrane. We wish to find the MreB-membrane  
1616 configuration that minimizes the sum of these terms. We prescribe the forms of these  
1617 terms as follows.

1618

## 1619 **The bending energy of an MreB filament**

1620

1621 We model an MreB filament as a cylindrical rod, with circular cross-sections of radius  
 $r_{\text{MreB}}$  and an intrinsic curvature  $1/R_{\text{MreB}}$ . The elastic energy density per unit length of

1622 bending a cylindrical rod of cross-sectional radius  $r_{MreB}$  from a curvature of  $1/R_{MreB}$  to a  
1623 curvature of  $1/R$  is given by:

1624

$$1625 \quad \varepsilon_{bend} = \frac{\pi Y_{MreB} r_{MreB}^4}{8} \left( \frac{1}{R} - \frac{1}{R_{MreB}} \right)^2 = \frac{B}{2} \left( \frac{1}{R} - \frac{1}{R_{MreB}} \right)^2, \quad (6)$$

1626

1627 where  $Y_{MreB}$  is the Young's modulus of an MreB filament and  $B$  is its flexural rigidity  
1628 (Landau and Lifshitz, 1970). Assuming the Young's modulus of actin, we note that  $B =$   
1629  $1.65 \times 10^{-25} \text{ J} \cdot \text{m}$ , which is two orders of magnitude smaller than that previously  
1630 assumed by Wang and Wingreen for an MreB bundle of cross-sectional radius 10 nm  
1631 (Wang and Wingreen, 2013). In particular, we assume that MreB binds to the inner  
1632 membrane as pairs of protofilaments and does not bundle. For a uniform flattening of  
1633 the MreB filament corresponding to  $R = \infty$ ,  $\varepsilon_{bend} \leq 8.2 \times 10^{-13} \text{ J/m}$ , which is less than  
1634 the MreB-membrane interaction energy  $\varepsilon_{int}$  computed above. This suggests that an  
1635 MreB filament may be susceptible to bending at our energy scale of interest. How much  
1636 the MreB bends is determined by a trade-off between the polymer bending energy and  
1637 the indentation energy of the membrane, which we discuss next.

1638

### 1639 **The membrane Hamiltonian**

1640 We model the inner membrane as an isotropic, fluid membrane composed of a  
1641 phospholipid bilayer, where there is no in-plane shear modulus and the only in-plane  
1642 deformations are compressions and expansions. The membrane indentation energy can  
1643 be expressed as the minimum of an energy functional over the indented states of the  
1644 membrane. This functional is given by the Helfrich Hamiltonian:

1645

$$1646 \quad F[S] = \int_S \left[ \frac{k_b}{2} (2H - H_s)^2 + \frac{k_t}{2} K + \gamma \right] dA + p \int_S dV, \quad (7)$$

1647

1648 where  $k_b$  is the bending rigidity of the membrane,  $k_t$  is the saddle-splay modulus of the  
1649 membrane,  $H_s$  is the spontaneous curvature of the bilayer,  $\gamma$  is the membrane surface  
1650 tension,  $p$  is the pressure differential at the membrane interface, and  $H$  and  $K$  are the  
1651 mean and Gaussian curvatures of the surface  $S$ , respectively (Safran, 2003; Zhong-Can  
1652 and Helfrich, 1989). The bending rigidity  $k_b$ , which depends on membrane composition,  
1653 is typically 10 to 20 kT for lipid bilayers (Phillips et al., 2012). Assuming that  
1654 phospholipids are in excess in the bulk and rearrange themselves on the membrane  
1655 surface to accommodate areal changes (Safran, 2003), we take the membrane surface  
1656 tension  $\gamma = 0$ . For large deformations of the inner membrane such as those induced by  
1657 cell wall lysis (Deng et al., 2011), the assumption that the phospholipids are in excess in  
1658 the bulk may fail to hold and result in a nonzero surface tension. A nonzero surface  
1659 tension would only enhance the energetic preference of the correct binding orientation;  
1660 hence, taking a finite surface tension would not change our conclusions. The  
1661 mechanical energy needed to deform the membrane is the difference between the free  
1662 energies in the deformed  $S$  and undeformed  $S_0$  states:

1663

$$1664 \quad E_{ind}^{membrane} = F[S] - F[S_0]. \quad (8)$$

1665  
1666  
1667  
1668

The surface integrals of the Gaussian curvature are topological invariants by the Gauss-Bonnet theorem and therefore cancel in the difference, hence:

$$E_{ind}^{membrane} = \left[ \frac{k_b}{2} \int_S (2H - H_s)^2 dA + p(\text{vol}[S]) \right] - \left[ \frac{k_b}{2} \int_{S_0} (2H_0 - H_s)^2 dA + p(\text{vol}[S_0]) \right]. \quad (9)$$

1670  
1671  
1672  
1673  
1674

Here  $H$  denotes the mean curvature of the state  $S$ , and  $H_0$  denotes the mean curvature of the state  $S_0$ . For simplicity, we set the spontaneous curvature  $H_s = 0$ ; the case of nonvanishing spontaneous curvature can be considered in a similar manner. We therefore write:

$$E_{ind}^{membrane} = \min_S \left[ 2k_b \int_S (H^2 - H_0^2) dA + p \int dV \right], \quad (10)$$

1677  
1678  
1679  
1680  
1681  
1682

where the volume integral is understood to be the difference of the volumes in the deformed and undeformed states and the areal change accompanying the membrane deformation is small, i.e.  $dA_0 \approx dA$ . We define the membrane bending energy  $E_{bend}^{membrane}[S; S_0]$  for a conformation  $S$  to be the former term and the membrane  $pV$  energy  $E_{pV}^{membrane}[S; S_0]$  to be the latter term in the right hand side of Equation 10.

1683  
1684  
1685  
1686  
1687  
1688

As  $k_b$  is typically 10 to 20 kT, we take  $k_b = 10$  kT and  $p$  as a parameter of the model. Note that  $p$  denotes the pressure difference acting on the membrane. The value of  $p$  is important for determining the tradeoff between the membrane indentation energy  $E_{ind}^{membrane}$  and the MreB bending energy  $E_{bend}^{MreB}$  accurately, but we will show that the preferred orientation of MreB binding is robust over a broad range of  $p$ .

1689

### Mechanical equilibrium of the undeformed membrane

1690  
1691  
1692  
1693  
1694  
1695

Consider the balance of forces on the inner membrane in the undeformed state. Assuming that the undeformed membrane is a cylinder with radius  $r$  and length  $L$  and that sufficient phospholipids exist in the bulk so that  $\gamma = 0$ , the membrane free energy is

$$E(r) = 2k_b \int_S H_0^2 dA + p \int dV = \frac{\pi k_b L}{r} - \pi p L r^2, \quad (11)$$

1697  
1698  
1699  
1700  
1701  
1702  
1703  
1704  
1705  
1706  
1707

which is monotonically decreasing in  $r$ . This implies that the membrane radius should be maximal at equilibrium. If  $p = 0$ , then the membrane should press against the cell wall and squeeze out the periplasmic space due to minimization of the bending energy. A model in which the periplasm and cytoplasm are isosmotic (Sochacki et al., 2011) with no mechanical force exerted by the periplasm is therefore inconsistent with the existence of a periplasm. For the periplasm to exist at equilibrium, it must contribute an additional energy term  $E_{peri}$  to the total energy, so that the total energy  $F = E + E_{peri}$  as a function of  $r$  has a stable fixed point at  $r_0 = r^* + \delta r^*$ . Here we define  $r^* = R_{cell} - h_{peri}$ , where  $R_{cell}$  is the radius of the cell and  $h_{peri}$  is the thickness of the periplasm, and  $\delta r^*$  as the initial deformed height where  $F'(r) = 0|_{r=r_0}$ . We consider expansions of  $E_{peri}$

1708 and  $F(r)$  around  $r_0$ . As a function of the deviation in membrane height  $\delta r = r - r_0$ , we  
 1709 take  $E_{peri} \approx \kappa L(\delta r)^2$  and

$$1711 \quad F(\delta r) \approx \kappa^* L(\delta r)^2, \quad (12)$$

1712  
 1713 where  $\kappa^* = \kappa - p\pi$  is the effective membrane pinning modulus, which has been  
 1714 examined before in Wang and Wingreen's work (Wang and Wingreen, 2013). For the  
 1715 stability of the fixed point at  $r_0$ , the condition that the second derivative  $F''(\delta r)$  is  
 1716 positive at  $\delta r = 0$  implies that  $\kappa^* \geq 0$ , or  $\kappa \geq p\pi$ . However, the validity of the expansion  
 1717  $E_{peri}(\delta r) = \kappa L(\delta r)^2$  may be questionable when the deformed height due to polymer  
 1718 binding is larger than or comparable to  $\delta r^* \sim pr/\kappa$ . Hence, the pinning model may be  
 1719 invalid when  $p$  is vanishingly small. For various combinations of  $\kappa$  and the polymer  
 1720 bending rigidity where this double-bind is avoided, such as that assumed by Wang and  
 1721 Wingreen's model, the periplasm is effectively a rigid body. In this case, although a  
 1722 pinning potential can self-consistently penalize deviations in membrane height, it is  
 1723 more intuitive to take the formal limit  $\kappa \rightarrow \infty$  and treat the periplasm as undeformable.  
 1724 We therefore model the periplasm as a rigid, undeformable body that mechanically  
 1725 supports the cell membrane and imposes a boundary condition on the membrane  
 1726 shape. Any deviation from the equilibrium membrane shape induced by MreB binding is  
 1727 then resisted by the full effect of turgor. For this reason, in the following analysis we  
 1728 take  $p = p_{cell}$ , stipulate that the MreB cannot indent the inner membrane outwards, and  
 1729 do not consider the energetic contribution of  $E_{peri}$ .

1730  
 1731 **Configuration with a uniformly bent MreB filament: first-order approximation**

1732 With the membrane Hamiltonian as defined in the section above, we now see that the  
 1733 total membrane deformation energy is given by the sum of the MreB bending energy  
 1734 and the membrane indentation energy:

$$1735 \quad E_{def}(l_b) = E_{bend}^{MreB}(l_b) + E_{ind}^{membrane}(l_b) = \min_{R,S} \left[ \frac{B}{2} \int \left( \frac{1}{R} - \frac{1}{R_{MreB}} \right)^2 ds + 2k_b \int_S (H^2 - \right.$$

$$1736 \quad \left. H_0^2) dA + p \int dV \right]. \quad (13)$$

1737  
 1738 The minimization of equation (13) over all surfaces  $S$  and MreB curvatures  $R = R(s)$  is  
 1739 generally difficult since minimization of the MreB bending energy determines the  
 1740 preferred conformation of MreB, which in turn restricts the set of surfaces  $S$  that  
 1741 equation (13) must be minimized over. In their work, Wang and Wingreen undertook an  
 1742 elegant approach to minimizing a similar combination of energies by writing the  
 1743 membrane indentation energy in Fourier space. Unlike a membrane pinning term, the  
 1744 pressure-volume energy in equation (13) does not admit a simple Fourier space  
 1745 representation. Nevertheless, considerable insight can be obtained by assuming that  
 1746 MreB bends uniformly. In this case, MreB deforms from a bent cylinder with a native  
 1747 curvature  $\frac{1}{R_{MreB}}$ , to a bent cylinder with a constant, membrane-bound curvature  $\frac{1}{R}$ . In the  
 1748 following, we will take the radius  $R$  of the bend to be a parameter in estimating the

1749 corresponding membrane indentation energy  $E_{ind}^{\text{membrane}}(l_b)$ ;  $R$  will be determined later.  
 1750 We will also assume that MreB binds perpendicular to the cell's long axis, so that the  
 1751 curvature of the membrane in its undeformed state is simply  $\frac{1}{R_{cell}}$ , and determine the  
 1752 corrections due to a deviatoric binding angle later.

1753  
 1754 To estimate  $E_{ind}^{\text{membrane}}$ , we first examine the energetic contribution of the region  $C$  of  $S$   
 1755 directly involved in the MreB-membrane interaction. Note that the biochemical  
 1756 conformation of MreB, particularly, the antiparallel orientation of its protofilaments,  
 1757 constrains the geometry of the MreB-membrane binding interface. Since we describe  
 1758 the interface  $C$  as the surface of a bent cylinder with principal radii of curvature  $\frac{1}{r_{MreB}}$  and  
 1759  $\frac{1}{R}$ , we have:

$$1760 \quad H \approx \frac{1}{2} \left( \frac{1}{r_{MreB}} + \frac{1}{R} \right), \quad A = 2\pi b r_{MreB} l_b \quad (14)$$

1761 where  $r_{MreB}$  is the cross-sectional radius of MreB and  $b$  is the fraction of interaction  
 1762 along a cross-section of the MreB filament. Thus:

$$1763 \quad E_{bend}^{\text{membrane}}[C] \approx \pi b k_b r_{MreB} l_b \left( \frac{1}{r_{MreB}} + \frac{1}{R} \right)^2 - \pi b k_b r_{MreB} l_b \left( \frac{1}{R_{cell}} \right)^2, \quad (15)$$

1764 where  $H_0 = 1/2R_{cell}$  and  $R_{cell}$  denoting the cell radius, is the mean curvature of the  
 1765 undeformed surface. The contribution of the  $pV$  energy over  $C$  can be similarly  
 1766 approximated by finding the area between two circles, one being the MreB filament and  
 1767 the other being the cross-section of a cell with radius  $R_{cell}$ , with  $R_{cell} \geq R$  as follows:

$$1768 \quad E_{pV}^{\text{membrane}}[C] \approx 2p r_{MreB} \int_{-R \sin(\frac{l_b}{2R})}^{R \sin(\frac{l_b}{2R})} \left( \sqrt{R_{cell}^2 - x^2} - \sqrt{R^2 - x^2} + R - R_{cell} \right) dx \approx$$

$$1769 \quad \frac{p r_{MreB} l_b^3}{12} \left( \frac{1}{R} - \frac{1}{R_{cell}} \right), \quad (16)$$

1770 where we have assumed that  $l_b \ll R$  and  $\frac{1}{R} \geq \frac{1}{R_{cell}}$ . This means that the approximation  
 1771 above is only valid for cases where the MreB filament can only bend up to a curvature  
 1772  $\frac{1}{R_{cell}}$ . Now, since  $\frac{1}{R} \ll \frac{1}{r_{MreB}}$ , we deduce that the principal bending energy contribution  
 1773 over  $C$  arises from having the inner membrane tightly wrapped around an MreB  
 1774 filament. For  $k_b = 10kT$  and  $b = 1/6$ ,  $E_{bend}^{\text{membrane}}[C]$  takes on a value of:

$$1775 \quad E_{bend}^{\text{membrane}}[C] \approx \pi b k_b l_b \left( \frac{1}{r_{MreB}} \right) \equiv \varepsilon l_b, \quad \varepsilon = 1.0 \times 10^{-11} \text{J/m}, \quad (17)$$

1776 which is smaller than, but comparable in scale to, the interaction energy  $E^{\text{int}}$  computed  
 1777 above. Writing out only the energetics of the binding region  $C$  under the uniform bending  
 1778 assumption, we therefore see that:



$$E_{def}(l_b) \approx \min_R \left[ \frac{B}{2} \left( \frac{1}{R} - \frac{1}{R_{MreB}} \right)^2 l_b + \frac{\pi b k_b l_b}{r_{MreB}} + \frac{p r_{MreB} l_b^3}{12} \left( \frac{1}{R} - \frac{1}{R_{cell}} \right) + \min_S F[\mathbf{H}] \right], \quad (18)$$

where the last term is the energetic contribution of the falloff region  $\mathbf{H} = S - C$ . In the case that  $\frac{1}{R} \rightarrow 0$ , estimates of the values of the first three terms in equation (18), for the parameter values summarized in Table S1, are  $10^{-19}$ J,  $10^{-18}$ J and  $10^{-17}$ J, respectively. This means that, as MreB binds to the inner membrane, the resulting deformation will tend to minimize volumetric changes at the cost of inducing membrane curvature and filament bending. The energetic contribution of the falloff region  $\mathbf{H}$  can only be quantitatively accounted for by explicitly finding the membrane shape, which encompasses a tradeoff between the membrane bending energy and the  $pV$  energy: the former term favors a gradual decay of the indentation, while the latter term prefers a steep decay as to minimize volume. Below, we find that it suffices to consider the case where MreB bends to match the cell curvature:  $R = R_{cell}$ . In this case, the energetic contribution of the falloff region  $\mathbf{H}$  is vanishingly small compared to that of the binding region, since the membrane can heal in a manner in which its mean curvature is small compared to the mean curvature of the binding region. The energetic contribution of  $\mathbf{H}$  can therefore be neglected, and we quantify it in future work.

#### $\Delta E$ for the pure bending of an MreB filament

By examining the form of the energetics just over the region  $C$ , we note that the inclusion of a large pressure  $p$  increases the energetic preference of an MreB filament binding perpendicular to the cellular long axis.

Consider a case where  $p \geq p^*$  for some  $p^*$  to be determined, so that it is energetically unfavorable to displace the membrane volume as opposed to bending the MreB filament. In this case, as discussed above, the energetic contribution of the falloff region  $\mathbf{H}$  can be neglected, and an estimate for the minimal value of such a pressure can be obtained by requiring that:

$$E_{def}(l_b) \approx \min_R \left[ \frac{B}{2} \left( \frac{1}{R} - \frac{1}{R_{MreB}} \right)^2 l_b + \frac{\pi b k_b l_b}{r_{MreB}} + \frac{p r_{MreB} l_b^3}{12} \left( \frac{1}{R} - \frac{1}{R_{cell}} \right) \right] \quad (19)$$

as a function of  $R$ , be minimal at  $R_{cell}$ . For the numerical values relevant to MreB above and summarized in Table S1, this indicates that:

$$p^* \approx \frac{12 B}{r_{MreB} l_b^2} \left( \frac{1}{R_{MreB}} - \frac{1}{R_{cell}} \right) \approx 20 \text{ kPa}, \quad (20)$$

which is 1/100<sup>th</sup> of the turgor pressure of *B. subtilis*. In this case, assuming  $R = R_{cell}$ ,

$$\Delta E(l_b) \approx \left[ \frac{B}{2} \left( \frac{1}{R} - \frac{1}{R_{MreB}} \right)^2 + \frac{\pi b k_b}{r_{MreB}} - \varepsilon_{int} \right] l_b, \quad (21)$$

1818 The energetic dependence on  $R_{cell}$  is then manifested through the pure bending of  
1819 MreB when binding to the inner membrane: in particular, we may assume that the MreB  
1820 filament will always bend to attain a curvature matching that of the cell's (although small  
1821 deviations in the membrane height may lead to an even lower energy conformation),  
1822 and the energetic contribution of the falloff region  $H$  can be neglected.

1823  
1824 If  $p < p^*$ , note that both the membrane and the MreB filament can deform each other in  
1825 a manner that minimizes the total energy, with the membrane shape determined by the  
1826 geometry of the falloff region  $H$ . For vesicles with a pressure gradient  $p \approx 0$ , the fact  
1827 that an MreB filament grossly deforms the membrane and generates membrane  
1828 curvature (Salje et al., 2011) is predicted by the shape of  $H$ . For  $p \approx 0$ , it can also be  
1829 shown that the energetic difference between MreB binding at  $R_{cell} = 500$  nm and  $R_{cell} =$   
1830 3000 nm is on the order of several  $kT$ , and so a perpendicular alignment of MreB  
1831 filaments may also be energetically favorable. For simplicity, in the following discussion  
1832 we shall consider the wild-type cell scenario, where  $p = p_{cell} > p^*$ , so that only the pure  
1833 bending of MreB and the associated membrane bending energy need to be considered  
1834 in  $\Delta E$ . We will therefore assume the form of equation (21) for  $\Delta E$  in the discussion that  
1835 follows.

### 1836 1837 **Preferred orientation of MreB binding**

1838 Equations (19) and (21) describe the change in free energy due to MreB binding at a  
1839 perpendicular angle and bending completely to match the curvature  $\frac{1}{R_{cell}}$  of the cell  
1840 membrane at this angle. Our modeling then predicts that MreB filaments tend to bind at  
1841 an angle of  $\theta = 90^\circ$  relative to the long axis of *B. subtilis*: at any deviatory angle  $|\theta -$   
1842  $90^\circ| > 0^\circ$ , the leading-order correction to the cell radius  $R_{cell}$  in the MreB bending  
1843 energy is a multiplicative factor of  $1/\cos \theta$ , which monotonically increases the MreB  
1844 bending energy. Since the MreB bending energy is minimal when the principal axis of  
1845 curvature of the MreB filament matches that of the cell and the curvature of the cell is  
1846 maximal at a perpendicular binding angle, the angle distribution is symmetric about a  
1847 minimum centered at  $\theta = 90^\circ$ . This reasoning suggests the existence of a potential  
1848 well centered at  $\theta = 90^\circ$ , as shown in Figure 4F under the simplifying assumption that  
1849  $b = 0$ . The depth of this potential well is on the order of tens of  $kT$ , which appears to be  
1850 a large enough energetic preference as to be robust to sources of stochasticity such as  
1851 thermal fluctuations. Furthermore, our discussion shows that membrane binding  
1852 energetics, and in particular the pure bending of an MreB filament, may complement the  
1853 conjecture in Salje *et al.*'s work that the membrane insertion loop and amphipathic helix  
1854 help ensure orthogonal membrane binding (Salje et al., 2011).

1855  
1856 A sensitivity analysis shows that the energetic difference of an MreB filament  
1857 perpendicularly binding to a region of ambient curvature  $R_{cell} = 0.5 \mu\text{m}$  and  $R_{cell} =$   
1858  $1.5 \mu\text{m}$  is still on the order of tens of  $kT$  over a wide range of binding energy and flexural  
1859 rigidity values, as shown in Figure 4G. Thus, we anticipate the alignment to be robust to  
1860 changes in these two parameters.

1861

## 1862 **A typical cell radius for losing orientation**

1863 Our modeling shows that the depth of the potential well in  $\theta$  is inversely related to  $R_{cell}$ ,  
1864 so that at larger cell diameters the angle distribution becomes more uniform. Varying  
1865 the cell radius  $R_{cell}$  from 0.5 microns to 3.0 microns results in a reduction of the depth of  
1866 the potential well, as illustrated in Figure 4F. We therefore anticipate MreB filaments to  
1867 bind with more variance in angle for higher values of  $R_{cell}$ , consistent with the existence  
1868 of a typical radius at which the binding angle becomes less robust and affected by  
1869 factors such as thermal fluctuations or other sources of stochasticity.

1870

## 1871 **Binding orientation at regions of different Gaussian curvatures**

1872 Our modeling predicts that, in live cells, MreB filaments will bend to conform to the  
1873 shape of the inner membrane. Since the binding sites are located at the outer edge of a  
1874 curved MreB filament, our modeling also predicts that the binding angle distribution  
1875 becomes more narrow at regions of negative Gaussian curvature: to bind in a  
1876 conformation that deviates significantly from the preferred binding orientation, in which  
1877 the filament's deformed curvature remains of the same sign as its intrinsic curvature, an  
1878 MreB filament must bend to the extent that its curvature flips sign. Similarly, at regions  
1879 of positive Gaussian curvature, the binding angle distribution will be less narrow.  
1880 Representative binding angle distributions are shown in three cases of positive,  
1881 vanishing, and negative Gaussian curvatures in Fig. 7B of the main text.

1882

1883

## 1884 **Supplemental Text 2 – Localization of WTA ligases and WTAs**

1885

1886 In order to understand how wall teichoic acid (WTA) depletion and recovery affects cell  
1887 shape, we observed the spatial localization of WTAs and the extracellular ligases (the  
1888 genes *lytR*, *yvhJ*, and *ywtF* (Kawai et al., 2011)) that determine their attachment to the  
1889 cell wall. Previous work has suggested that YwtF and LytR localize in MreB-like patterns  
1890 (Kawai et al., 2011) and associate with MreB (assayed by *in vivo* crosslinking and  
1891 tandem affinity purification). We reasoned that if the synthesis or insertion of WTAs is  
1892 MreB associated, then the emergence of discrete rod-shaped cells upon *tagO* depletion  
1893 might correlate with preferential WTA insertion at the emerging rod, where MreB shows  
1894 oriented motion. To test this, we examined 1) the localization and dynamics of  
1895 fluorescently tagged WTA ligases, and 2) the spatial localization of WTAs in cells  
1896 recovering from spheres into rods. We constructed sfGFP fusions to each of the WTA  
1897 ligases under their native promoters, and examined their localization using TIRF and  
1898 epifluorescent illumination. Although we did observe variation in ligase intensity around  
1899 the cell periphery under epifluorescent illumination, we did not see any characteristic  
1900 banding across the cell surface as is seen with MreB using TIRF microscopy (Fig. S6C).  
1901 Furthermore, TIRF imaging of these fusions at different frame rates did not show any  
1902 directional motions, indicating they are not moving along with MreB filaments; rather  
1903 these motions suggested the WTA ligases were diffusing on the cell membrane (Movie  
1904 S9). We cannot rule out the possibility that the WTA ligases interact with MreB through  
1905 transient associations.

1906  
1907 We next explored the localization of WTAs, using fluorescently labeled Concanavalin A  
1908 (ConA). ConA is a sugar-binding protein with specific affinity for  $\alpha$ -D-glucose, which  
1909 decorates WTA polymers. ConA has previously been used to localize WTAs (Birdsell et  
1910 al., 1975; Doyle et al., 1975). The gene *tagE* encodes the glycosylase that adds  $\alpha$ -D-  
1911 glucose to WTA molecules (Allison et al., 2011), which is recognized by ConA. ConA  
1912 staining of cells deleted for *tagE* shows no staining (Fig. S6A), verifying the specificity of  
1913 ConA for WTAs over other surface sugars. We then used this probe to examine WTA  
1914 localizations during recoveries. Addition of ConA to WTA-depleted cells in bulk culture  
1915 shows very little staining at the cell periphery, consistent with a basal level of WTA  
1916 expression; induction of *tagO* results in a dramatically increased intensity of staining.  
1917 Even at early time points, when rod-shaped cells are just starting to appear in the  
1918 population, WTA staining is relatively uniform, with no patterns reminiscent of the patchy  
1919 distribution of MreB (Fig. S6B). Together, this data indicates that WTA ligases and WTA  
1920 incorporation occur uniformly around the cell in both wild type cells as well as in TagO  
1921 depleted spheres recovering into rods. These findings suggest that the changes in  
1922 activity of TagO that cause the loss of rod shape (or the reformation thereof) occur  
1923 uniformly around the cell wall. Furthermore, these findings also suggest that the WTA  
1924 ligases do not consistently localize to MreB within *B. subtilis*.

1925  
1926

## 1927 **Supplemental Movie Legends**

1928  
1929 All supplemental movies are available at <http://garnerlab.fas.harvard.edu/mreb2017/>

1930

1931 **S1. Related to Figure 1C** - Movie showing the trajectories taken by Mbl filaments  
1932 frequently cross each other close in time. BDR2061, containing GFP-Mbl expressed at  
1933 the native locus under a xylose-inducible promoter, was induced with 10 mM xylose and  
1934 imaged with TIRFM. Frames are 1 s apart. Scale bar is 5  $\mu$ m.

1935

1936 **S2A. Related to Figure 2A – (first sequence)** Timelapse showing circumferential  
1937 motions of GFP-MreB in rod shaped cells with high TagO expression (BEG300 with 30  
1938 mM xylose, and GFP-MreB induced with 50  $\mu$ M IPTG) **(second sequence)** Timelapse  
1939 of GFP-MreB trajectories in equivalent conditions. **(third sequence)** Timelapse

1940 showing isotropic motions of GFP-Mbl in a *tagO* knock out strain (BEG202, GFP-Mbl  
1941 was induced with 0.125 mM xylose). (**fourth sequence**) Timelapse of GFP-Mbl  
1942 trajectories in equivalent conditions as above. Frames are 1 s apart in the first and  
1943 second sequences, 2 s apart in the third and fourth. All Scale bars are 1  $\mu$ m.

1944

1945 **S2B. Related to Figure 2C – (top)** Timelapse of GFP-Mbl trajectories occurring 2  
1946 hours after the initiation of Pbp2a depletion (**middle and bottom**). Timelapse of GFP-  
1947 Mbl trajectories occurring 3 hours after initiation of Pbp2a depletion, where cells  
1948 become a mixture of rod shaped and round cells. GFP-Mbl shows a mixture of  
1949 circumferential (bottom) and isotropic (middle) motion. BRB785 was grown in 1 mM  
1950 IPTG, washed, then grown in media lacking IPTG. Cells were placed under a pad at the  
1951 indicated times, and imaged with spinning disk confocal. Frames are 5 s apart. Scale  
1952 bar is 2.5  $\mu$ m.

1953

1954 **S3. Related to Figure 3A-C** - Timelapse showing circumferential motion of GFP-MreB  
1955 in BEG300 induced at low TagO levels (2 mM xylose) when confined into long 1.5 x 1.5  
1956  $\mu$  m channels. GFP-MreB was induced with 50  $\mu$ M IPTG. Frames are 2 s apart. Scale  
1957 bar is 5  $\mu$ m.

1958

1959 **S4. Related to Figure 3D-F** – Timelapse of GFP-Mbl in protoplasted cells showing Mbl  
1960 does not move directionally. BJS18 (containing GFP-Mbl expressed at an ectopic site  
1961 under xylose control) was induced with 30 mM xylose. Cells were then protoplasted in

1962 SMM and grown in molds as detailed in methods. Frames are 1 s apart. Scale bar is 5  
1963  $\mu\text{m}$ . Movie was gamma-adjusted,  $\gamma = 0.8$ .

1964

1965 **S5. Related to Figure 4 – (first sequence)** PyMOL volume rendering of an electron  
1966 cryotomography 3D map of *T. maritima* MreB included in a liposome (corresponds to  
1967 liposome depicted in Fig. 4E. **(second sequence)** Typical field view of an MreB  
1968 liposome reconstitution experiment. The movie scans through consecutive Z-layers of  
1969 the tomographic 3D reconstruction. Note that the smaller, round liposomes trapped  
1970 inside the rod-shaped liposomes are not decorated with MreB filaments.

1971

1972 **S6. Related to Figure 5 – (top and middle)** Timelapses showing the local recovery of  
1973 rod shape upon TagO reinduction from depleted cells. Note the relatively fast growth of  
1974 rods compared to parent spheres. BEG300 was grown in media lacking xylose, then  
1975 either loaded into a cellASIC device (top row) or placed under an agar pad (middle row).  
1976 Both rows were shifted to 30 mM xylose to induce rod-shape recovery, prior to image  
1977 acquisition. Frames are 10 min apart. Scale bar is 5  $\mu\text{m}$ .

1978 **(bottom)** Timelapse showing the local recovery of rod shape upon Pbp2a reinduction  
1979 from cells depleted of Pbp2a/PbpH. BRB785 was grown media lacking IPTG for 4.5  
1980 hours, then placed on a pad with 1 mM IPTG before the start of imaging. Frames are 5  
1981 min apart. Scale bar is 5  $\mu\text{m}$ .

1982

1983 **S7. Related to Figure 5 and 6** – Timelapse of rod shape recoveries showing that  
1984 circumferential MreB-GFP motion A) occurs immediately upon the formation of rod  
1985 shape, and B) that circumferential motion only occurs in rod-shaped cells, even while  
1986 attached non-rod cells show unaligned motion. BEG300 was grown overnight in 0mM  
1987 xylose to deplete TagO. Cells were then loaded into a cellASIC chamber and grown in  
1988 the same media with 1 mM IPTG to induce GFP-MreB. Prior to imaging, *tagO*  
1989 expression was reinduced by switching media to contain 30mM xylose. GFP-MreB was  
1990 imaged with TIRFM. Frames are 2 s apart in the fluorescent channel (green) and 10 min  
1991 apart in the phase contrast channel (grayscale). Scale bar is 5  $\mu$ m.

1992

1993 **S8. Related to Figure 5** – Timelapse showing the loss and recovery of rod shape in  
1994 cells with intermediate TagO levels when magnesium is removed and added back to the  
1995 medium. BCW51 was grown in LB supplemented with 8 mM xylose and 20 mM  
1996 magnesium, then loaded into a cellASIC chamber, and grown in the same media for 30  
1997 minutes. At the start of the video the media is switched to contain 0 mM magnesium,  
1998 causing the cells to lose rod shape. At 4:00:00 the media is switched to contain 20 mM  
1999 magnesium where the cells revert back into rod-shaped cells. Frames are 20 min apart.  
2000 Scale bar is 1  $\mu$ m.

2001

2002 **S9. Related to Figure 6B** – Timelapse showing that the teichoic acid ligases TagTUV  
2003 do not move circumferentially. Strains shown are BMD61, BCW81, BCW79 and  
2004 BCW78, where Mbl, TagU (LytR), TagV (YvhJ), and TagT (YwtF) respectively are fused

2005 to msfGFP, and expressed from their native promoters. Cells were grown in CH medium  
2006 and imaged using TIRF illumination every 100 ms. Scale bar is 5  $\mu$ m.

2007

2008

2009



2010 **Supplemental Tables**

2011

2012 **Table S1: Model Parameters. Related to Figure 4 and Supplemental**

2013 **Text 1.**

2014

| Quantity                                                                        | Estimate                | Source                       |
|---------------------------------------------------------------------------------|-------------------------|------------------------------|
| <b>MreB values</b>                                                              |                         |                              |
| MreB bound length $l_b$                                                         | 220 nm                  | This work                    |
| MreB monomer length $l_{MreB}$                                                  | 51 angstroms            | (van den Ent et al., 2014)   |
| MreB cross-sectional radius $r_{MreB}$                                          | 3.2 nm                  | (van den Ent et al., 2014)   |
| MreB wild-type principal radius of curvature $R_{MreB}$                         | 300 nm                  | This work                    |
| MreB Young's modulus $Y_{MreB}$                                                 | Similar to actin; 2 GPa | (Kojima et al., 1994)        |
| MreB cross-sectional binding fraction $b$                                       | 0                       | This work                    |
| <b>Cell values</b>                                                              |                         |                              |
| <i>B. subtilis</i> periplasm thickness $h_{peri}$                               | 22 nm                   | (Matias and Beveridge, 2005) |
| <i>B. subtilis</i> cross-sectional radius $R_{cell}$                            | 500 nm                  | This work                    |
| <i>B. subtilis</i> internal turgor pressure $p_{cell}$                          | 20 atm                  | (Whatmore and Reed, 1990)    |
| <b>Binding energy values</b>                                                    |                         |                              |
| Unit MreB-cell membrane interaction energy $E_{int}^0$                          | 10 kT                   | This work                    |
| Absolute temperature $T$                                                        | 300 K                   | This work                    |
| <i>B. subtilis</i> typical cross-sectional radius $R_{cell}^*$ for losing shape | about 1-1.5 microns     | This work                    |

2015

2016 **Table S2 – Strains used in this study**

| Strain  | Genotype (all strains are Py79 unless otherwise noted)                           | Source                                 |
|---------|----------------------------------------------------------------------------------|----------------------------------------|
| BCW51   | <i>ycgO::Pxyl-tagO, tagO::erm, amyE::sfGFP-mreB, sinR::phleo</i>                 | This work                              |
| BCW61   | <i>tagE::erm</i>                                                                 | This work                              |
| BCW72   | <i>yvhJQPxylA-mazF (cat)</i>                                                     | This work                              |
| BCW77   | <i>ywtFQPxylA-mazF (cat)</i>                                                     | This work                              |
| BCW78   | <i>ywtFQmsfGFP-ywtF</i>                                                          | This work                              |
| BCW79   | <i>yvhJQmsfGFP-yvhJ</i>                                                          | This work                              |
| BCW80   | <i>lytRQPxylA-mazF (cat)</i>                                                     | This work                              |
| BCW81   | <i>lytRQmsfGFP-lytR</i>                                                          | This work                              |
| BCW82   | <i>tagO::erm, ycgO::PxylA-tagO, amyE::Pspac-gfp-mreB (spec), dacA::kan</i>       | This work                              |
| BDR2061 | <i>amyE::PxylA-gfp-mbl (spec), mblQpMUTIN4 (erm)</i>                             | (Carballido-Lopez and Errington, 2003) |
| BEB1451 | <i>hisA1 argC4 metC3 tagO::erm</i>                                               | (D'Elia et al., 2006)                  |
| BJS18   | <i>amyE::PxylA-gfp-mbl (spec)</i>                                                | (Defeu Soufo and Graumann, 2004)       |
| BMD61   | <i>mblQmbl-msfGFP (spec)</i>                                                     | This work                              |
| BRB785  | <i>yhdG::Pspank-pbpA (phleo), pbpH::spec, pbpA::erm, mblQPxylA-gfp-mbl (cat)</i> | (Garner et al., 2011)                  |
| BEG202  | <i>ΔtagO::erm amyE::Pxyl-gfp-mbl (spec)</i>                                      | (Kawai et al., 2011)                   |
| BEG281  | <i>ycgO::PxylA-tagO</i>                                                          | This work                              |
| BEG291  | <i>tagO::erm, ycgO::PxylA-tagO,</i>                                              | This work                              |

|         |                                                                                         |                         |
|---------|-----------------------------------------------------------------------------------------|-------------------------|
| BEG275  | <i>amyE::Pspac-gfp-mreB (spec)</i>                                                      | (Billings et al., 2014) |
| BEG300  | <i>tagO::erm, ycgO::PxylA-tagO, amyE::Pspac-gfp-mreB (spec),</i>                        | This work               |
| BRB4282 | <i>168 trpC2 ΔtagO::erm</i>                                                             | (D'Elia et al., 2006)   |
| bAB343  | <i>ftsZΩmNeonGreen-15aa-ftsZ, amyE::spc-Pspank-mciZ, ycgO::cat-Pxyl-tagO, tagO::erm</i> | This work               |
| bAB327  | <i>ftsZΩmNeonGreen-15aa-ftsZ, amyE::Phyperspank-minCD, ycgO::Pxyl-tagO, tagO::erm</i>   | This work               |
| bAB388  | <i>ftsZΩmNeonGreen-15aa-ftsZ, amyE::Physpank-ftsA ycgO::cat-Pxyl-tagO, tagO::erm</i>    | This work               |

2017  
2018  
2019  
2020

**Table S3 – Oligonucleotides used in this study**

| Primer | Sequence                                                                 |
|--------|--------------------------------------------------------------------------|
| oCW054 | TGCAATTCAGGGTTGACTG                                                      |
| oCW055 | ATACGAACGGTACTGAGCGAGGGAGCAGAACGGCATCTAGAATATATGATCATTG                  |
| oCW056 | ACTTATTAATAATTTATAGCTATTGAAAAGAGAT                                       |
| oCW057 | TTTTCAATAGCTATAAATTATTTAATAAGTCTTGGAGGGTCACGGAAATAAA                     |
| oCW058 | TTTCATCCTTGTTTTGAGGCTA                                                   |
| oCW072 | ATGCGAAAAGGGGAAGAATTGTTTA                                                |
| oCW073 | GCCGCTTCCTTGGCCTGA                                                       |
| oCW100 | TCCGTATGGAGATGGAGAGG                                                     |
| oCW101 | CCGCTTATCCTTTTCACAGC                                                     |
| oCW109 | ATACGAACGGTAGTTGACCAGTGCTCCCTGCCTTTGCACCTCGTCTGTTAAAT                    |
| oCW125 | AAAATTAACGTAAGTACTGATTGGGTAGTCTAGAATGAGAAACGAACGCAGAAAAAAG               |
| oCW137 | GCCTGTAAACAATTCTTCCCCTTTTCGCATCCTTTGCACCTCGTCTGTTAAAT                    |
| oCW138 | CAGGGACCGGGCTCAGGCCAAGGAAGCGGCATGAGAAACGAACGCAGAAAAA<br>G                |
| oCW139 | ATAAACGGTTTCTCGCATGG                                                     |
| oCW141 | ATACGAACGGTAGTTGACCAGTGCTCCCTGTTATTCAGTCTCCTTTATGTGATTGA                 |
| oCW142 | AAAATTAACGTAAGTACTGATTGGGTAGTCTAGAATGGCTGAACGCGTTAGAGTG                  |
| oCW143 | GAGCTGTCAGTCCCGTCTTC                                                     |
| oCW145 | CAGGGACCGGGCTCAGGCCAAGGAAGCGGCATGGCTGAACGCGTTAGAGTG                      |
| oCW146 | GCCTGTAAACAATTCTTCCCCTTTTCGCATTATTCAGTCTCCTTTATGTGATTGAC                 |
| oCW159 | ATACGAACGGTAGTTGACCAGTGCTCCCTGATATCAATACCTCACGTTTCTTTAAT<br>ATTT         |
| oCW160 | GCCTGTAAACAATTCTTCCCCTTTTCGCATATCAATACCTCACGTTTCTTTAATA<br>TTT           |
| oCW161 | CTTTGCTTTCTTCGCCATTG                                                     |
| oCW163 | CAGGGACCGGGCTCAGGCCAAGGAAGCGGCATGGAAGAACGATCACAGCGC                      |
| oCW164 | AAAATTAACGTAAGTACTGATTGGGTAGTCTAGAATGGAAGAACGATCACAGCGC                  |
| oCW165 | CGCCATCCCGTTCATTATAC                                                     |
| oMD44  | AATTCTCGAAGGAGAGCCTGTTG                                                  |
| oMD47  | TGATTTCAACAACCTCATTCTGAAAAAGAATGAGGTTTTTTTATGAAAAATTCTGCT<br>CCCTCGCTCAG |
| oMD48  | CGTCATTTAACATCTTTTCGTGAAGGCCAGGGAGCACTGGTCAAC                            |

|             |                                                                  |
|-------------|------------------------------------------------------------------|
| oMD50       | CGTGAACATCATCGCTCC                                               |
| oMD56       | TTCTTTTTCAGAATGAGGTTTGTGAAATCATTTGTAAAGTTCATCCATTCCATGCG         |
| oMD90       | TGGCCAGGGACCGGGCTCAGGCCAAGGAAGCGGCATGCGAAAAGGGGAAGAAT<br>TGTTTAC |
| oMD108      | ACGAACGGTAGTTGACCAGTGCTCCCTGTCTTGACACTCCTTATTTGATTTTTGA<br>AGAC  |
| oMD191      | TTTGGATGGATTGAGCCCGATTG                                          |
| oMD196      | GGGCAAGGCTAGACGGG                                                |
| oMD197      | TCACATACTCGTTTCCAAACGGATC                                        |
| oMD234      | ATACGAACGGTACTGAGCGAGGGAGCAGAATAATGGATTTCTTACGCGAAATAC<br>G      |
| oEG85       | GAGAGCTTGATGTCACAAGCAGCTGGGAAGGAATTCGTGCCATGTCACACTATTGCT        |
| oEG86       | ATAAAGAAGTCTCCTTTGGACTCGAGGCATTCAAATACAGATGCATTTTATTTTATA        |
| oEG87       | TGAAATAAAATGCATCTGTATTTGAATGCCTCGAGTCCAAAGGAGACTTCTTTATG<br>CTTG |
| oEG88       | AATAAGGGTAACTATTGCCGTATGGGATCCATGCTAGCTTAATTCCTTTTCACCAG<br>CCG  |
| oJM028      | TTCTGCTCCCTCGCTCAG                                               |
| oJM029      | CAGGGAGCACTGGTCAAC                                               |
| oMK047      | TCTAGACTACCCAATCAGTACGTT                                         |
| Sinr_up_F   | CAGTTGAAATGGACAAACAAATC                                          |
| Sinr_up_R   | ACTGAGCGAGGGAGCAGAAGTGTGTCATCACCTTCCTTG                          |
| Sinr_DOWN_F | GTTGACCAGTGCTCCCTGTGCCTGAGCAGAGGC                                |
| Sinr_DOWN_R | GGACAGCACCATGTCTACTTAAAC                                         |
| oSW76       | TAGATCACCTCCTTAAGCTT                                             |
| oAB291      | CGGTAAGTCCCGTCTAGCCTTGCCCTTATGGCTTTGAGATCCAATCTTT                |
| oAB307      | CAATTAAGCTTAAGGAGGTGATCTAGTGAAAGTGCACCGCATGCC                    |

2021

2022

## Supplemental References

2023

2024 Agulleiro, J.I., and Fernandez, J.J. (2011). Fast tomographic reconstruction on multicore  
2025 computers. *Bioinformatics* 27, 582–583.

2026

2027 Allison, S.E., D'Elia, M.A., Arar, S., Monteiro, M.A., and Brown, E.D. (2011). Studies of  
2028 the genetics, function, and kinetic mechanism of TagE, the wall teichoic acid  
glycosyltransferase in *Bacillus subtilis* 168. *J Biol Chem* 286, 23708–23716.

2029

2030 Amat, F., Moussavi, F., Comolli, L.R., Elidan, G., Downing, K.H., and Horowitz, M.  
2031 (2008). Markov random field based automatic image alignment for electron tomography.  
*J. Struct. Biol.* 161, 260–275.

2032

2033 Atrih, A., Bacher, G., Allmaier, G., Williamson, M.P., and Foster, S.J. (1999). Analysis of  
2034 peptidoglycan structure from vegetative cells of *Bacillus subtilis* 168 and role of PBP 5  
in peptidoglycan maturation. *Journal of Bacteriology* 181, 3956–3966.

2035

2036 Billings, G., Ouzounov, N., Ursell, T., Desmarais, S.M., Shaevitz, J., Gitai, Z., and  
2037 Huang, K.C. (2014). De novo morphogenesis in L-forms via geometric control of cell  
growth. *Mol Microbiol* 93, 883–896.

- 2038 Birdsell, D.C., Doyle, R.J., and Morgenstern, M. (1975). Organization of teichoic acid in  
2039 the cell wall of *Bacillus subtilis*. *Journal of Bacteriology* *121*, 726–734.
- 2040 Bisson-Filho, A.W., Hsu, Y.-P., Squyres, G.R., Kuru, E., Wu, F., Jukes, C., Sun, Y.,  
2041 Dekker, C., Holden, S., VanNieuwenhze, M.S., et al. (2017). Treadmilling by FtsZ  
2042 filaments drives peptidoglycan synthesis and bacterial cell division. *Science* *355*, 739–  
2043 743.
- 2044 Carballido-Lopez, R., and Errington, J. (2003). The bacterial cytoskeleton: in vivo  
2045 dynamics of the actin-like protein Mbl of *Bacillus subtilis*. *Dev. Cell* *4*, 19–28.
- 2046 D'Elia, M.A., Millar, K.E., Beveridge, T.J., and Brown, E.D. (2006). Wall Teichoic Acid  
2047 Polymers Are Dispensable for Cell Viability in *Bacillus subtilis*. *Journal of Bacteriology*  
2048 *188*, 8313–8316.
- 2049 Defeu Soufo, H.J., and Graumann, P.L. (2004). Dynamic movement of actin-like  
2050 proteins within bacterial cells. *EMBO Rep.* *5*, 789–794.
- 2051 DeLano, W.L. (2002). The PyMOL molecular graphics system.
- 2052 Deng, Y., Sun, M., and Shaevitz, J.W. (2011). Direct measurement of cell wall stress  
2053 stiffening and turgor pressure in live bacterial cells. *Phys. Rev. Lett.* *107*, 158101.
- 2054 Doyle, R.J., McDannel, M.L., Helman, J.R., and Streips, U.N. (1975). Distribution of  
2055 teichoic acid in the cell wall of *Bacillus subtilis*. *Journal of Bacteriology* *122*, 152–158.
- 2056 Garner, E.C., Bernard, R., Wang, W., Zhuang, X., Rudner, D.Z., and Mitchison, T.  
2057 (2011). Coupled, circumferential motions of the cell wall synthesis machinery and MreB  
2058 filaments in *B. subtilis*. *Science* *333*, 222–225.
- 2059 Glauner, B., Holtje, J.V., and Schwarz, H. (1988). The composition of the murein of  
2060 *Escherichia coli*. *J Biol Chem* *263*, 10088–10095.
- 2061 Jaqaman, K., Loerke, D., Mettlen, M., Kuwata, H., Grinstein, S., Schmid, S.L., and  
2062 Danuser, G. (2008). Robust single-particle tracking in live-cell time-lapse sequences.  
2063 *Nat. Methods* *5*, 695–702.
- 2064 Kawai, Y., Marles-Wright, J., Cleverley, R.M., Emmins, R., Ishikawa, S., Kuwano, M.,  
2065 Heinz, N., Bui, N.K., Hoyland, C.N., Ogasawara, N., et al. (2011). A widespread family  
2066 of bacterial cell wall assembly proteins. *Embo J.* *30*, 4931–4941.
- 2067 Kojima, H., Ishijima, A., and Yanagida, T. (1994). Direct measurement of stiffness of  
2068 single actin filaments with and without tropomyosin by in vitro nanomanipulation. *Proc.*  
2069 *Natl. Acad. Sci. U.S.a.* *91*, 12962–12966.
- 2070 Kremer, J.R., Mastrorarde, D.N., and McIntosh, J.R. (1996). Computer visualization of  
2071 three-dimensional image data using IMOD. *J. Struct. Biol.* *116*, 71–76.

- 2072 Kuru, E., Hughes, H.V., Brown, P.J., Hall, E., Tekkam, S., Cava, F., de Pedro, M.A.,  
2073 Brun, Y.V., and VanNieuwenhze, M.S. (2012). In Situ probing of newly synthesized  
2074 peptidoglycan in live bacteria with fluorescent D-amino acids. *Angew. Chem. Int. Ed.*  
2075 *Engl.* *51*, 12519–12523.
- 2076 Kühner, D., Stahl, M., Demircioglu, D.D., and Bertsche, U. (2014). From cells to  
2077 muropeptide structures in 24 h: peptidoglycan mapping by UPLC-MS. *Sci Rep* *4*, 7494.
- 2078 Landau, L.D., and Lifshitz, E. (1970). *Theory of Elasticity* (Pergamon Press).
- 2079 Mastronarde, D.N. (2005). Automated electron microscope tomography using robust  
2080 prediction of specimen movements. *J. Struct. Biol.* *152*, 36–51.
- 2081 Matias, V.R.F., and Beveridge, T.J. (2005). Cryo-electron microscopy reveals native  
2082 polymeric cell wall structure in *Bacillus subtilis* 168 and the existence of a periplasmic  
2083 space. *Mol Microbiol* *56*, 240–251.
- 2084 Norman, T.M., Lord, N.D., Paulsson, J., and Losick, R. (2013). Memory and modularity  
2085 in cell-fate decision making. *Nature* *503*, 481–486.
- 2086 Pettersen, E.F., Goddard, T.D., Huang, C.C., Couch, G.S., Greenblatt, D.M., Meng,  
2087 E.C., and Ferrin, T.E. (2004). UCSF Chimera—A visualization system for exploratory  
2088 research and analysis. *Journal of Computational Chemistry* *25*, 1605–1612.
- 2089 Phillips, R., Kondev, J., Theriot, J., and Garcia, H. (2012). *Physical Biology of the Cell*  
2090 (Garland Science).
- 2091 Safran, S.A. (2003). *Statistical thermodynamics of surfaces, interfaces, and membranes*  
2092 (Westview Press).
- 2093 Salje, J., van den Ent, F., de Boer, P., and Löwe, J. (2011). Direct membrane binding by  
2094 bacterial actin MreB. *Mol Cell* *43*, 478–487.
- 2095 Schindelin, J., Arganda-Carreras, I., Frise, E., Kaynig, V., Longair, M., Pietzsch, T.,  
2096 Preibisch, S., Rueden, C., Saalfeld, S., Schmid, B., et al. (2012). Fiji: an open-source  
2097 platform for biological-image analysis. *Nat. Methods* *9*, 676–682.
- 2098 Schneider, C.A., Rasband, W.S., and Eliceiri, K.W. (2012). NIH Image to ImageJ: 25  
2099 years of image analysis. *Nat. Methods* *9*, 671–675.
- 2100 Sochacki, K.A., Shkel, I.A., Record, M.T., and Weisshaar, J.C. (2011). Protein diffusion  
2101 in the periplasm of *E. coli* under osmotic stress. *Biophys J* *100*, 22–31.
- 2102 Szwedziak, P., Wang, Q., Bharat, T.A.M., Tsim, M., and Löwe, J. (2014). Architecture of  
2103 the ring formed by the tubulin homologue FtsZ in bacterial cell division. *Elife* *3*, e04601.
- 2104 Tinevez, J.-Y., Perry, N., Schindelin, J., Hoopes, G.M., Reynolds, G.D., Laplantine, E.,

- 2105 Bednarek, S.Y., Shorte, S.L., and Eliceiri, K.W. (2017). TrackMate: An open and  
2106 extensible platform for single-particle tracking. *Methods* *115*, 80–90.
- 2107 Ursell, T., Lee, T.K., Shiomi, D., Shi, H., Tropini, C., Monds, R.D., Colavin, A., Billings,  
2108 G., Bhaya-Grossman, I., Broxton, M., et al. (2017). Rapid, precise quantification of  
2109 bacterial cellular dimensions across a genomic-scale knockout library. *BMC Biol.* *15*, 17.
- 2110 van den Ent, F., Izoré, T., Bharat, T.A., Johnson, C.M., and Löwe, J. (2014). Bacterial  
2111 actin MreB forms antiparallel double filaments. *Elife* *3*, e02634.
- 2112 Wang, S., and Wingreen, N.S. (2013). Cell shape can mediate the spatial organization  
2113 of the bacterial cytoskeleton. *Biophysical Journal* *104*, 541–552.
- 2114 Whatmore, A.M., and Reed, R.H. (1990). Determination of turgor pressure in *Bacillus*  
2115 *subtilis*: a possible role for K<sup>+</sup> in turgor regulation. *J. Gen. Microbiol.* *136*, 2521–2526.
- 2116 Yu, H., Yan, X., Shen, W., Shen, Y., and Zhang, J. (2010). Efficient and precise  
2117 construction of markerless manipulations in the *Bacillus subtilis* genome. *Journal of*  
2118 *Microbiology* ....
- 2119 Zhong-Can, O.Y., and Helfrich, W. (1989). Bending energy of vesicle membranes:  
2120 General expressions for the first, second, and third variation of the shape energy and  
2121 applications to spheres and cylinders. *Phys. Rev. A* *39*, 5280–5288.
- 2122
- 2123
